# Supplementary material for: Kinetics of the C–C bond beta scission reactions in alkyl radicals
Source: Royal Society of Chemistry journal article supplement (doi:10.1039/c1cp21229j), 2011-01-01
Supplement: c1cp21229j.pdf [file c1cp21229j.pdf]

**Supplementary Information for:**

# Kinetics of the C-C Bond Beta Scission Reactions in Alkyl Radicals

*Artur Ratkiewicz\**

Chemistry Institute, University of Bialystok, Hurtowa 1 15-399 Bialystok, Poland

\*AUTHOR EMAIL ADDRESS: artrat@uwb.edu.pl

## Contents:

|                                                                                                                                     |       |
|-------------------------------------------------------------------------------------------------------------------------------------|-------|
| Energies, zero point energies, moments of inertia values for reactants, products and transition states of the reactions R1-R12..... | 3-6   |
| Optimized geometries and frequencies for reactants, products and transition states of the reactions R1-R12.....                     | 7-38  |
| Potential energy data along the MEP for the reactions R1-R4.....                                                                    | 39-76 |
| Calculated high pressure limits of rate constants for the reactions R1-R4 .....                                                     | 77    |
| Calculated high pressure limits of rate constants for the reactions R <sup>-1</sup> -R <sup>-4</sup> .....                          | 78    |
| Calculation of the RC-TST rate constants for the reactions R5-R12.....                                                              | 79-86 |

**SI Table 1:** Energies, zero point energies, moments of inertia values for reactants, products and transition states of the reactions R1-R12. All data calculated with GAUSSIAN 03 program at the BH&HLYP/cc-pVDZ level of theory.

| Specie | Energy (Hartree) |                                  | Moments of inertia (AMU)           | ZPE (Hartree) |
|--------|------------------|----------------------------------|------------------------------------|---------------|
|        | BH&HLYP/cc-pVDZ  | CCSD(T)/cc-pVDZ//BH&HLYP/cc-pVDZ |                                    |               |
| CCC.   | -118.393126      | -118.111295                      | 57.32811<br>202.93896<br>225.51944 | 0.090663      |
| C=C    | -78.535203       | -78.352596                       | 12.30874<br>59.33805<br>71.64680   | 0.052487      |
| C.     | -39.811568       | -39.715156                       | 6.32926<br>6.32928<br>12.65854     | 0.030235      |
| TS R1  | -118.3359319     | -118.0585036                     | 64.84996<br>284.95692<br>313.03142 | 0.086357      |
| CCCC.  | -1.576823        | -157.311775                      | 72.96050<br>474.18892<br>501.34894 | 0.120044      |
| CC.    | -79.105029       | -78.9158971                      | 17.44815<br>79.05434<br>85.30820   | 0.060750      |
| TS R2  | -157.628309      | -157.259228                      | 91.96298<br>578.31617<br>622.50737 | 0.116293      |
| CCC.C  | -157.6880079     | -157.313452                      | 67.60139<br>492.78849<br>524.19216 | 0.119855      |

**SI Table 1 cont.:** Energies, zero point energies, moments of inertia values for reactants, products and transition states of the reactions R1-R12. All data calculated with GAUSSIAN 03 program at the BH&HLYP/cc-pVDZ level of theory.

| Specie  | Energy (Hartree) |                                  | Moments of inertia (AMU)<br>BH&HLYP/cc-pVDZ | ZPE (Hartree)<br>BH&HLYP/cc-pVDZ |
|---------|------------------|----------------------------------|---------------------------------------------|----------------------------------|
|         | BH&HLYP/cc-pVDZ  | CCSD(T)/cc-pVDZ//BH&HLYP/cc-pVDZ |                                             |                                  |
| C=CC    | -117.8260564     | -117.5509873                     | 38.60719<br>193.76571<br>221.17905          | 0.081406                         |
| TS R3   | -157.629911      | -157.2608033                     | 137.93027<br>491.11307<br>555.33596         | 0.115401                         |
| CC(C.)C | -157.683173      | -157.3111560                     | 212.90727<br>226.17460<br>387.71724         | 0.119552                         |
| TS R4   | -157.626381      | -157.25862916                    | 227.25657<br>305.45438<br>465.33096         | 0.115565                         |
| C.CCCCC | -236.260089      |                                  | 119.09412<br>1533.08096<br>1584.2665        | 0.1787319                        |
| TS R5   | -236.2057292     |                                  | 142.0351<br>1740.0218<br>1812.1858          | 0.1752405                        |
| CC.CCCC | -236.2658779     |                                  | 112.6570<br>1570.3021<br>1623.6570          | 0.1784701                        |
| TS R6   | -236.2104516     |                                  | 185.0610<br>1646.2317<br>1714.3834          | 0.1748826                        |
| CCC.CCC | -236.2655834     |                                  | 120.5044<br>1563.3609<br>1620.4529          | 0.1786369                        |

**SI Table 1 cont.:** Energies, zero point energies, moments of inertia values for reactants, products and transition states of the reactions R1-R12. All data calculated with GAUSSIAN 03 program at the BH&HLYP/cc-pVDZ level of theory.

| Specie    | Energy (Hartree) |                                  | Moments of inertia (AMU)<br>BH&HLYP/cc-pVDZ | ZPE (Hartree)<br>BH&HLYP/cc-pVDZ |
|-----------|------------------|----------------------------------|---------------------------------------------|----------------------------------|
|           | BH&HLYP/cc-pVDZ  | CCSD(T)/cc-pVDZ//BH&HLYP/cc-pVDZ |                                             |                                  |
| TS R7     | -236.2105258     |                                  | 171.1500<br>1623.1412<br>1669.0686          | 0.1748226                        |
| C=CCC     | -157.1145840     |                                  | 61.2909<br>450.0574<br>489.1062             | 0.1110103                        |
| C.CCCCCC  | -314.8378788     |                                  | 163.1718<br>3579.3801<br>3652.5462          | 0.2373327                        |
| TS R8     | -314.7819211     |                                  | 190.4557<br>3881.6939<br>3980.1776          | 0.2338345                        |
| CC.CCCCCC | -314.8436626     |                                  | 156.5424<br>3634.4237<br>3708.7747          | 0.2370665                        |
| TS R9     | -314.789179      |                                  | 235.0984<br>3776.2607<br>3844.6045          | 0.2334470                        |
| C.CCCC    | -196.9711964     |                                  | 100.8923<br>894.1817<br>938.2075            | 0.1494508                        |
| CCC.CCCCC | -314.8433621     |                                  | 168.9410<br>3621.4785<br>3702.4130          | 0.2372145                        |
| TS R10    | -314.7851800     |                                  | 249.6236<br>3551.8279<br>3668.0918          | 0.2327849                        |

**SI Table 1 cont.:** Energies, zero point energies, moments of inertia values for reactants, products and transition states of the reactions R1-R12. All data calculated with GAUSSIAN 03 program at the BH&HLYP/cc-pVDZ level of theory.

| Specie    | Energy (Hartree) |                                  | Moments of inertia (AMU)<br>BH&HLYP/cc-pVDZ | ZPE (Hartree)<br>BH&HLYP/cc-pVDZ |
|-----------|------------------|----------------------------------|---------------------------------------------|----------------------------------|
|           | BH&HLYP/cc-pVDZ  | CCSD(T)/cc-pVDZ//BH&HLYP/cc-pVDZ |                                             |                                  |
| C=CCCCC   | -274.9814980     |                                  | 126.2333<br>2359.3765<br>2430.2125          | 0.1989689                        |
| CCCC.CCCC | -314.8434515     |                                  | 168.5369<br>3637.2375<br>3713.0985          | 0.2371799                        |
| TS R11    | -314.7883822     |                                  | 235.0619<br>3776.2781<br>3844.6706          | 0.2334470                        |
| C=CCCC    | -196.4037150     |                                  | 82.7803<br>870.7818<br>920.2680             | 0.1403662                        |
| TS R12    | -314.7884598     |                                  | 250.3183<br>3618.1065<br>3693.5221          | 0.2334003                        |
| C=CCCCC   | -235.6925920     |                                  | 105.2947<br>1491.8224<br>1552.7708          | 0.1696574                        |

**SI Tables 2-33:** Optimized geometries and frequencies for reactants, products and transition states of the reactions R1-R12. All data calculated with GAUSSIAN 03 program at the BH&HLYP/cc-pVDZ level of theory.

| <b>SI Table 2: CCC.</b>              |             |          |          |          |
|--------------------------------------|-------------|----------|----------|----------|
| <b>Optimized geometry (Angstrom)</b> |             |          |          |          |
| Atom number                          | Atom Symbol | <b>X</b> | <b>Y</b> | <b>Z</b> |
| 1                                    | C           | 1.2194   | -0.2417  | -0.0351  |
| 2                                    | H           | 1.2917   | -0.7785  | -0.986   |
| 3                                    | H           | 1.2773   | -0.9829  | 0.769    |
| 4                                    | H           | 2.0923   | 0.4118   | 0.0509   |
| 5                                    | C           | -0.0775  | 0.5514   | 0.0483   |
| 6                                    | H           | -0.0868  | 1.1232   | 0.9924   |
| 7                                    | H           | -0.1022  | 1.3132   | -0.7416  |
| 8                                    | C           | -1.2972  | -0.2941  | -0.0344  |
| 9                                    | H           | -1.2783  | -1.3249  | 0.3069   |
| 10                                   | H           | -2.2623  | 0.1445   | -0.2645  |
| <b>Frequencies (cm<sup>-1</sup>)</b> |             |          |          |          |
| 126                                  | 263         | 378      | 473      | 779      |
| 913                                  | 949         | 1082     | 1128     | 1207     |
| 1307                                 | 1403        | 3034     | 3115     | 3117     |
| 3191                                 | 3197        | 3223     | 3333     | 1451     |
| 1493                                 | 1498        | 1522     | 1531     |          |

**SI Table 3: TS R1**

| <b>Optimized geometry (Angstrom)</b> |             |          |          |          |
|--------------------------------------|-------------|----------|----------|----------|
| Atom number                          | Atom Symbol | <b>X</b> | <b>Y</b> | <b>Z</b> |
| 1                                    | C           | -0.0001  | 0.0001   | 0.0001   |
| 2                                    | C           | -0.0003  | -0.0002  | 2.2954   |
| 3                                    | H           | 1.0838   | -0.0008  | 2.2661   |
| 4                                    | H           | -0.4789  | -0.973   | 2.266    |
| 5                                    | C           | -0.6747  | 1.0839   | 2.7478   |
| 6                                    | H           | -1.7487  | 1.0579   | 2.9025   |
| 7                                    | H           | -0.1767  | 2.0358   | 2.9025   |
| 8                                    | H           | 0.5677   | -0.909   | -0.1761  |
| 9                                    | H           | 0.502    | 0.9378   | -0.2135  |
| 10                                   | H           | -1.0629  | -0.0394  | -0.2141  |
| <b>Frequencies (cm<sup>-1</sup>)</b> |             |          |          |          |
| 105                                  | 230         | 365      | 517      | 538      |
| 817                                  | 840         | 888      | 975      | 1039     |
| 1270                                 | 1327        | 1440     | 1445     | 1490     |
| 1619                                 | 3170        | 3228     | 3240     | 3316     |
| 3341                                 | 3342        | 3350     | -465i    |          |



| <b>SI Table 4: C=C</b>               |             |          |          |          |
|--------------------------------------|-------------|----------|----------|----------|
| <b>Optimized geometry (Angstrom)</b> |             |          |          |          |
| Atom number                          | Atom Symbol | <b>X</b> | <b>Y</b> | <b>Z</b> |
| 1                                    | C           | -0.0036  | 0        | 0.0023   |
| 2                                    | H           | -0.0029  | 0        | 1.0883   |
| 3                                    | C           | 1.1224   | 0        | -0.6926  |
| 4                                    | H           | 1.1216   | 0        | -1.7787  |
| 5                                    | H           | 2.0928   | 0        | -0.2049  |
| 6                                    | H           | -0.974   | 0        | -0.4855  |
| <b>Frequencies (cm<sup>-1</sup>)</b> |             |          |          |          |
| 852                                  | 1014        | 1015     | 1095     | 1272     |
| 1413                                 | 1497        | 1766     | 3223     | 3243     |
| 3309                                 | 3335        |          |          |          |

**SI Table 5: C.**

| <b>Optimized geometry (Angstrom)</b> |             |          |          |          |
|--------------------------------------|-------------|----------|----------|----------|
| Atom number                          | Atom Symbol | <b>X</b> | <b>Y</b> | <b>Z</b> |
| 1                                    | C           | 0        | 0        | 0        |
| 2                                    | H           | 0        | 0        | 1.0828   |
| 3                                    | H           | 0.9377   | 0        | -0.5414  |
| 4                                    | H           | -0.9377  | 0.0007   | -0.5414  |
| <b>Frequencies (cm<sup>-1</sup>)</b> |             |          |          |          |
| 457                                  | 1424        | 1424     | 3190     | 3387     |
| 3387                                 |             |          |          |          |

**SI Table 6: CCCC.**

| <b>Optimized geometry (Angstrom)</b> |             |          |          |          |
|--------------------------------------|-------------|----------|----------|----------|
| Atom number                          | Atom Symbol | <b>X</b> | <b>Y</b> | <b>Z</b> |
| 1                                    | C           | -0.0015  | 0.0008   | -0.0013  |
| 2                                    | H           | 0.0001   | 0.0016   | 1.0951   |
| 3                                    | H           | 1.0512   | 0.0016   | -0.3076  |
| 4                                    | C           | -0.6705  | 1.2889   | -0.5027  |
| 5                                    | H           | -1.7231  | 1.2738   | -0.1927  |
| 6                                    | H           | -0.6694  | 1.273    | -1.6     |
| 7                                    | C           | -0.0172  | 2.5323   | -0.0144  |
| 8                                    | H           | 0.8462   | 2.9438   | -0.5272  |
| 9                                    | H           | -0.2698  | 2.9485   | 0.9555   |
| 10                                   | C           | -0.6877  | -1.2546  | -0.5155  |
| 11                                   | H           | -0.1952  | -2.1588  | -0.1464  |
| 12                                   | H           | -1.7349  | -1.2923  | -0.1968  |
| 13                                   | H           | -0.6757  | -1.2923  | -1.6101  |
| <b>Frequencies (cm<sup>-1</sup>)</b> |             |          |          |          |
| 69                                   | 131         | 252      | 262      | 405      |
| 532                                  | 759         | 821      | 907      | 970      |
| 1076                                 | 1116        | 1129     | 1230     | 1318     |
| 1331                                 | 1365        | 1416     | 1450     | 1493     |
| 1517                                 | 1520        | 1522     | 1535     | 3097     |
| 3112                                 | 3115        | 3132     | 3155     | 3187     |
| 3192                                 | 3225        | 3334     |          |          |

**SI Table 7. CC.**

| <b>Optimized geometry (Angstrom)</b> |             |          |          |          |
|--------------------------------------|-------------|----------|----------|----------|
| Atom number                          | Atom Symbol | <b>X</b> | <b>Y</b> | <b>Z</b> |
| 1                                    | C           | 0.0023   | 0.0009   | 0.0017   |
| 2                                    | H           | 0.0027   | -0.0042  | 1.0964   |
| 3                                    | H           | 1.0426   | -0.0043  | -0.339   |
| 4                                    | H           | -0.4365  | -0.9588  | -0.3161  |
| 5                                    | C           | -0.7505  | 1.1574   | -0.5438  |
| 6                                    | H           | -0.5433  | 1.5346   | -1.5395  |
| 7                                    | H           | -1.6336  | 1.5328   | -0.0378  |
| <b>Frequencies (cm<sup>-1</sup>)</b> |             |          |          |          |
| 132                                  | 466         | 826      | 1004     | 1104     |
| 1223                                 | 1431        | 1492     | 1507     | 1511     |
| 3056                                 | 3143        | 3190     | 3232     | 3341     |

**SI Table 8: TS R2**

| <b>Optimized geometry (Angstrom)</b> |             |          |          |          |
|--------------------------------------|-------------|----------|----------|----------|
| Atom number                          | Atom Symbol | <b>X</b> | <b>Y</b> | <b>Z</b> |
| 1                                    | C           | -0.0013  | -0.0014  | 0.0005   |
| 2                                    | C           | -0.002   | -0.0011  | 2.2763   |
| 3                                    | H           | 1.0825   | -0.0043  | 2.2439   |
| 4                                    | H           | -0.4805  | -0.9743  | 2.2448   |
| 5                                    | C           | -0.6696  | 1.075    | 2.762    |
| 6                                    | H           | -1.7415  | 1.0473   | 2.9296   |
| 7                                    | H           | -0.1688  | 2.0233   | 2.9286   |
| 8                                    | H           | 0.4701   | 0.9631   | -0.1694  |
| 9                                    | H           | -1.0749  | -0.0073  | -0.1698  |
| 10                                   | C           | 0.7664   | -1.2235  | -0.379   |
| 11                                   | H           | 0.835    | -1.3323  | -1.4715  |
| 12                                   | H           | 1.7927   | -1.1932  | 0.0014   |
| 13                                   | H           | 0.2935   | -2.135   | 0.0011   |
| <b>Frequencies (cm<sup>-1</sup>)</b> |             |          |          |          |
| 58                                   | 162         | 166      | 262      | 385      |
| 582                                  | 797         | 837      | 846      | 871      |
| 926                                  | 1037        | 1064     | 1105     | 1247     |
| 1269                                 | 1321        | 1434     | 1488     | 1499     |
| 1512                                 | 1513        | 1615     | 3077     | 3147     |
| 3185                                 | 3209        | 3224     | 3236     | 3305     |
| 3313                                 | 3338        | -469i    |          |          |

| <b>SI Table 9: CCC.C</b>             |             |          |          |          |
|--------------------------------------|-------------|----------|----------|----------|
| <b>Optimized geometry (Angstrom)</b> |             |          |          |          |
| Atom number                          | Atom Symbol | <b>X</b> | <b>Y</b> | <b>Z</b> |
| 1                                    | C           | -0.0028  | -0.0038  | 0.0061   |
| 2                                    | H           | -0.0135  | -0.0119  | 1.1108   |
| 3                                    | H           | 1.0628   | 0.0043   | -0.2634  |
| 4                                    | C           | -0.6475  | 1.2425   | -0.4917  |
| 5                                    | H           | -1.7048  | 1.2058   | -0.7458  |
| 6                                    | C           | -0.6576  | -1.2784  | -0.5062  |
| 7                                    | H           | -0.1625  | -2.1692  | -0.1096  |
| 8                                    | H           | -1.7111  | -1.3238  | -0.2111  |
| 9                                    | H           | -0.618   | -1.3283  | -1.5987  |
| 10                                   | C           | -0.01    | 2.5697   | -0.2895  |
| 11                                   | H           | -0.4774  | 3.3457   | -0.9018  |
| 12                                   | H           | -0.0809  | 2.9025   | 0.7595   |
| 13                                   | H           | 1.0593   | 2.5427   | -0.5317  |
| <b>Frequencies (cm<sup>-1</sup>)</b> |             |          |          |          |
| 66                                   | 119         | 251      | 265      | 413      |
| 442                                  | 791         | 878      | 996      | 1013     |
| 1072                                 | 1103        | 1170     | 1217     | 1307     |
| 1345                                 | 1434        | 1450     | 1469     | 1497     |
| 1502                                 | 1511        | 1522     | 1530     | 3022     |
| 3046                                 | 3097        | 3117     | 3130     | 3189     |
| 3190                                 | 3197        | 3240     |          |          |

**SI Table 10: C=CC**

**Optimized geometry (Angstrom)**

| Atom number | Atom Symbol | X | Y       | Z       |
|-------------|-------------|---|---------|---------|
| 1           | C           | C | 0.1334  | -0.4522 |
| 2           | H           | H | 0.1673  | -1.5411 |
| 3           | C           | C | 1.2754  | 0.2202  |
| 4           | H           | H | 1.2936  | 1.307   |
| 5           | H           | H | 2.2333  | -0.2892 |
| 6           | C           | C | -1.2281 | 0.1617  |
| 7           | H           | H | -1.8014 | -0.1541 |
| 8           | H           | H | -1.8014 | -0.1541 |
| 9           | H           | H | -1.1756 | 1.2535  |

**Frequencies (cm<sup>-1</sup>)**

|      |      |      |      |      |
|------|------|------|------|------|
| 216  | 435  | 611  | 963  | 970  |
| 984  | 1063 | 1105 | 1226 | 1361 |
| 1440 | 1482 | 1504 | 1518 | 1797 |
| 3109 | 3168 | 3200 | 3224 | 3235 |

**SI Table 11: TS R3**

| <b>Optimized geometry (Angstrom)</b> |             |          |          |          |
|--------------------------------------|-------------|----------|----------|----------|
| Atom number                          | Atom Symbol | <b>X</b> | <b>Y</b> | <b>Z</b> |
| 1                                    | C           | -0.0003  | -0.0003  | -0.0001  |
| 2                                    | C           | -0.0001  | 0.0003   | 2.2928   |
| 3                                    | H           | 1.085    | 0.0002   | 2.2651   |
| 4                                    | H           | -0.481   | -0.9708  | 2.2786   |
| 5                                    | C           | -0.6711  | 1.09     | 2.7425   |
| 6                                    | H           | -1.7467  | 1.0158   | 2.8918   |
| 7                                    | H           | 0.5669   | -0.9091  | -0.1799  |
| 8                                    | H           | 0.5028   | 0.9361   | -0.2192  |
| 9                                    | H           | -1.0621  | -0.04    | -0.2205  |
| 10                                   | C           | -0.0573  | 2.4334   | 2.9494   |
| 11                                   | H           | -0.2578  | 2.8121   | 3.9585   |
| 12                                   | H           | 1.0267   | 2.4047   | 2.8077   |
| 13                                   | H           | -0.4692  | 3.174    | 2.2518   |
| <b>Frequencies (cm<sup>-1</sup>)</b> |             |          |          |          |
| 98                                   | 121         | 156      | 268      | 428      |
| 508                                  | 521         | 688      | 813      | 941      |
| 956                                  | 970         | 1020     | 1073     | 1223     |
| 1319                                 | 1434        | 1441     | 1445     | 1471     |
| 1501                                 | 1516        | 1637     | 3097     | 3151     |
| 3168                                 | 3193        | 3230     | 3238     | 3330     |
| 3337                                 | 3345        | -474i    |          |          |



**SI Table 12: CC(C)C**

**Optimized geometry (Angstrom)**

| Atom number | Atom Symbol | X       | Y       | Z       |
|-------------|-------------|---------|---------|---------|
| 1           | C           | 0.0045  | 0.0074  | 0.0029  |
| 2           | H           | 0.0041  | -0.007  | 1.0881  |
| 3           | H           | 0.9645  | -0.005  | -0.5033 |
| 4           | C           | -1.1658 | 0.3597  | -2.1727 |
| 5           | H           | -2.0717 | 0.14    | -2.7456 |
| 6           | H           | -1.0387 | 1.4472  | -2.1453 |
| 7           | H           | -0.3148 | -0.0629 | -2.7155 |
| 8           | C           | -2.4678 | 0.3442  | -0.0117 |
| 9           | H           | -3.3964 | 0.1235  | -0.5468 |
| 10          | H           | -2.5469 | -0.0888 | 0.9901  |
| 11          | H           | -2.3917 | 1.4312  | 0.0986  |
| 12          | C           | -1.2579 | -0.2099 | -0.7594 |
| 13          | H           | -1.4092 | -1.3001 | -0.8586 |

**Frequencies (cm<sup>-1</sup>)**

|      |      |      |      |      |
|------|------|------|------|------|
| 137  | 239  | 269  | 369  | 381  |
| 411  | 534  | 849  | 930  | 966  |
| 1003 | 1020 | 1122 | 1222 | 1243 |
| 1368 | 1380 | 1437 | 1449 | 1492 |
| 1511 | 1516 | 1526 | 1537 | 3009 |
| 3111 | 3115 | 3186 | 3190 | 3191 |
| 3194 | 3221 | 3331 |      |      |

**SI Table 13: TS R4**

| <b>Optimized geometry (Angstrom)</b> |             |         |         |         |
|--------------------------------------|-------------|---------|---------|---------|
| Atom number                          | Atom Symbol | X       | Y       | Z       |
| 1                                    | C           | 0.0003  | -0.0005 | 0.0002  |
| 2                                    | C           | 0       | 0.0003  | 2.2773  |
| 3                                    | H           | 1.0852  | 0.0006  | 2.2148  |
| 4                                    | C           | -0.614  | 1.1654  | 2.617   |
| 5                                    | H           | -1.6798 | 1.1993  | 2.824   |
| 6                                    | H           | 0.6857  | -0.8226 | -0.1867 |
| 7                                    | H           | 0.3613  | 0.9922  | -0.2483 |
| 8                                    | H           | -1.0491 | -0.1923 | -0.2015 |
| 9                                    | C           | -0.6449 | -1.3393 | 2.4963  |
| 10                                   | H           | -1.733  | -1.2721 | 2.4088  |
| 11                                   | H           | -0.2911 | -2.0899 | 1.7864  |
| 12                                   | H           | -0.4147 | -1.7073 | 3.503   |
| 13                                   | H           | -0.0786 | 2.1084  | 2.6089  |
| <b>Frequencies (cm<sup>-1</sup>)</b> |             |         |         |         |
| 122                                  | 177         | 220     | 287     | 424     |
| 531                                  | 547         | 564     | 839     | 874     |
| 948                                  | 965         | 1017    | 1078    | 1218    |
| 1310                                 | 1435        | 1441    | 1446    | 1474    |
| 1510                                 | 1520        | 1618    | 3115    | 3165    |
| 3182                                 | 3209        | 3227    | 3246    | 3327    |
| 3333                                 | 3342        | -510i   |         |         |

**SI Table 14. C.CCCCC**

**Optimized geometry (Angstrom)**

| Atom number | Atom Symbol | X       | Y       | Z       |
|-------------|-------------|---------|---------|---------|
| 1           | C           | -3.1264 | 0.2109  | 0       |
| 2           | H           | -3.2126 | 0.8533  | -0.8829 |
| 3           | H           | -3.9827 | -0.4698 | 0       |
| 4           | H           | -3.2126 | 0.8533  | 0.8829  |
| 5           | C           | -1.8094 | -0.5492 | 0       |
| 6           | H           | -1.7667 | -1.2087 | -0.876  |
| 7           | H           | -1.7667 | -1.2087 | 0.876   |
| 8           | C           | -0.5906 | 0.3623  | 0       |
| 9           | H           | -0.6322 | 1.0227  | -0.8766 |
| 10          | H           | -0.6322 | 1.0227  | 0.8765  |
| 11          | C           | 0.7315  | -0.391  | 0       |
| 12          | H           | 0.7799  | -1.0489 | 0.8766  |
| 13          | H           | 0.7799  | -1.0489 | -0.8766 |
| 14          | C           | 1.9537  | 0.5381  | 0       |
| 15          | H           | 1.8911  | 1.1921  | 0.8789  |
| 16          | H           | 1.8911  | 1.1921  | -0.8789 |
| 17          | C           | 3.2539  | -0.1842 | 0       |
| 18          | H           | 3.6935  | -0.5357 | -0.928  |

**Frequencies (cm<sup>-1</sup>)**

|      |      |      |      |      |
|------|------|------|------|------|
| 67   | 83   | 116  | 137  | 162  |
| 259  | 296  | 381  | 438  | 547  |
| 758  | 768  | 824  | 923  | 933  |
| 1027 | 1032 | 1074 | 1115 | 1117 |
| 1164 | 1233 | 1281 | 1286 | 1344 |
| 1364 | 1365 | 1374 | 1419 | 1451 |
| 1462 | 1494 | 1515 | 1517 | 1520 |
| 1523 | 1531 | 1540 | 3091 | 3098 |
| 3101 | 3109 | 3112 | 3117 | 3130 |
| 3142 | 3160 | 3185 | 3191 | 3224 |
| 3333 |      |      |      |      |

**SI Table 15: TS R5**

| <b>Optimized geometry (Angstrom)</b> |             |         |         |         |
|--------------------------------------|-------------|---------|---------|---------|
| Atom number                          | Atom Symbol | X       | Y       | Z       |
| 1                                    | C           | 0.5126  | 0.7182  | 0       |
| 2                                    | C           | 2.33    | -0.6552 | -0.0001 |
| 3                                    | H           | 1.958   | -1.0941 | -0.9197 |
| 4                                    | H           | 1.9579  | -1.0943 | 0.9195  |
| 5                                    | C           | 3.4798  | 0.0639  | 0       |
| 6                                    | H           | 3.9393  | 0.3961  | -0.9254 |
| 7                                    | H           | 0.7165  | 1.2739  | -0.9124 |
| 8                                    | H           | 0.7165  | 1.2739  | 0.9124  |
| 9                                    | C           | -0.6657 | -0.2017 | 0       |
| 10                                   | H           | -0.6264 | -0.8595 | -0.8781 |
| 11                                   | H           | -0.6264 | -0.8593 | 0.8782  |
| 12                                   | H           | 3.9392  | 0.3959  | 0.9255  |
| 13                                   | C           | -2.0118 | 0.5297  | 0       |
| 14                                   | H           | -2.0632 | 1.187   | 0.8762  |
| 15                                   | H           | -2.0632 | 1.1869  | -0.8763 |
| 16                                   | C           | -3.1991 | -0.4205 | 0       |
| 17                                   | H           | -4.1475 | 0.1245  | 0       |
| 18                                   | H           | -3.1877 | -1.0684 | -0.883  |
| <b>Frequencies (cm<sup>-1</sup>)</b> |             |         |         |         |
| 42                                   | 64          | 93      | 134     | 234     |
| 257                                  | 303         | 381     | 428     | 577     |
| 762                                  | 800         | 832     | 838     | 878     |
| 917                                  | 978         | 985     | 1038    | 1075    |
| 1112                                 | 1146        | 1241    | 1269    | 1321    |
| 1325                                 | 1338        | 1369    | 1423    | 1453    |
| 1488                                 | 1499        | 1516    | 1520    | 1523    |
| 1536                                 | 1615        | 3094    | 3111    | 3114    |
| 3127                                 | 3152        | 3187    | 3192    | 3200    |
| 3225                                 | 3237        | 3296    | 3313    | 3339    |
| -442i                                |             |         |         |         |

**SI Table 16: CC.CCCC**

| <b>Optimized geometry (Angstrom)</b> |             |          |          |          |
|--------------------------------------|-------------|----------|----------|----------|
| Atom number                          | Atom Symbol | <b>X</b> | <b>Y</b> | <b>Z</b> |
| 1                                    | C           | -3.1595  | 0.2338   | -0.0662  |
| 2                                    | H           | -3.2182  | 0.7925   | -1.0064  |
| 3                                    | H           | -4.0214  | -0.4384  | -0.0253  |
| 4                                    | H           | -3.262   | 0.9556   | 0.7511   |
| 5                                    | C           | -1.8497  | -0.5311  | 0.0372   |
| 6                                    | H           | -1.791   | -1.2686  | -0.7733  |
| 7                                    | H           | -1.834   | -1.1077  | 0.9708   |
| 8                                    | C           | -0.6244  | 0.3691   | -0.016   |
| 9                                    | H           | -0.6348  | 0.9462   | -0.9493  |
| 10                                   | H           | -0.6801  | 1.106    | 0.7962   |
| 11                                   | C           | 0.6925   | -0.3888  | 0.0875   |
| 12                                   | H           | 0.6912   | -0.9796  | 1.0219   |
| 13                                   | H           | 0.7526   | -1.1378  | -0.7158  |
| 14                                   | C           | 1.8986   | 0.4825   | 0.0438   |
| 15                                   | H           | 1.8029   | 1.5088   | 0.3908   |
| 16                                   | C           | 3.2598   | -0.0969  | -0.098   |
| 17                                   | H           | 3.2873   | -0.8729  | -0.8724  |
| 18                                   | H           | 4.0036   | 0.6632   | -0.3522  |
| <b>Frequencies (cm<sup>-1</sup>)</b> |             |          |          |          |
| 51                                   | 98          | 123      | 128      | 149      |
| 258                                  | 306         | 377      | 409      | 479      |
| 758                                  | 806         | 930      | 938      | 943      |
| 1010                                 | 1071        | 1095     | 1117     | 1134     |
| 1177                                 | 1209        | 1269     | 1299     | 1343     |
| 1366                                 | 1373        | 1430     | 1449     | 1459     |
| 1476                                 | 1496        | 1502     | 1511     | 1516     |
| 1523                                 | 1525        | 1538     | 3013     | 3046     |
| 3087                                 | 3097        | 3104     | 3113     | 3125     |
| 3130                                 | 3149        | 3185     | 3189     | 3191     |
| 3242                                 |             |          |          |          |

**SI Table 17: TS R6**

| <b>Optimized geometry (Angstrom)</b> |             |         |         |         |
|--------------------------------------|-------------|---------|---------|---------|
| Atom number                          | Atom Symbol | X       | Y       | Z       |
| 1                                    | C           | -0.7566 | -0.3398 | 0.402   |
| 2                                    | C           | 1.0606  | 0.8969  | -0.1897 |
| 3                                    | H           | 0.5873  | 1.7699  | 0.2451  |
| 4                                    | H           | 0.8233  | 0.6918  | -1.2293 |
| 5                                    | C           | 2.1904  | 0.3861  | 0.3641  |
| 6                                    | H           | 2.4847  | 0.7239  | 1.356   |
| 7                                    | H           | -0.4481 | -1.3082 | 0.0132  |
| 8                                    | C           | -1.9144 | 0.3305  | -0.2673 |
| 9                                    | H           | -1.9834 | 1.3729  | 0.0674  |
| 10                                   | H           | -1.7463 | 0.3666  | -1.3507 |
| 11                                   | C           | 3.0112  | -0.7007 | -0.2443 |
| 12                                   | H           | 2.6611  | -0.952  | -1.2495 |
| 13                                   | H           | 4.0666  | -0.4124 | -0.3155 |
| 14                                   | H           | 2.9794  | -1.6157 | 0.3614  |
| 15                                   | H           | -0.6882 | -0.256  | 1.4846  |
| 16                                   | C           | -3.2503 | -0.3643 | 0.0021  |
| 17                                   | H           | -3.4744 | -0.386  | 1.0732  |
| 18                                   | H           | -4.0727 | 0.1529  | -0.5032 |
| <b>Frequencies (cm<sup>-1</sup>)</b> |             |         |         |         |
| 38                                   | 66          | 95      | 147     | 159     |
| 264                                  | 279         | 378     | 434     | 558     |
| 687                                  | 774         | 806     | 927     | 932     |
| 940                                  | 952         | 973     | 1019    | 1072    |
| 1087                                 | 1144        | 1222    | 1244    | 1315    |
| 1354                                 | 1381        | 1433    | 1441    | 1469    |
| 1499                                 | 1502        | 1512    | 1516    | 1520    |
| 1533                                 | 1631        | 3095    | 3103    | 3112    |
| 3140                                 | 3148        | 3186    | 3191    | 3194    |
| 3194                                 | 3223        | 3237    | 3290    | 3323    |
| -457i                                |             |         |         |         |

**SI Table 18: CCC.CCC**

| <b>Optimized geometry (Angstrom)</b> |             |         |         |         |
|--------------------------------------|-------------|---------|---------|---------|
| Atom number                          | Atom Symbol | X       | Y       | Z       |
| 1                                    | C           | 3.184   | -0.1292 | 0.0904  |
| 2                                    | H           | 3.2491  | -0.7926 | 0.9595  |
| 3                                    | H           | 3.361   | -0.7392 | -0.8019 |
| 4                                    | C           | 1.8313  | 0.5605  | 0.0258  |
| 5                                    | H           | 1.6922  | 1.1879  | 0.9141  |
| 6                                    | H           | 1.8064  | 1.2418  | -0.8337 |
| 7                                    | C           | 0.6655  | -0.4148 | -0.0806 |
| 8                                    | H           | 0.8183  | -1.0553 | -0.9686 |
| 9                                    | H           | 0.6867  | -1.1097 | 0.7717  |
| 10                                   | C           | -0.6682 | 0.2412  | -0.1556 |
| 11                                   | H           | -0.7265 | 1.2412  | -0.5828 |
| 12                                   | C           | -1.9272 | -0.5419 | -0.0231 |
| 13                                   | H           | -1.841  | -1.231  | 0.8286  |
| 14                                   | H           | -2.0514 | -1.1974 | -0.9033 |
| 15                                   | C           | -3.1715 | 0.3205  | 0.1326  |
| 16                                   | H           | -3.2982 | 0.9852  | -0.7282 |
| 17                                   | H           | -4.0738 | -0.2917 | 0.2157  |
| 18                                   | H           | -3.1053 | 0.9475  | 1.0271  |
| <b>Frequencies (cm<sup>-1</sup>)</b> |             |         |         |         |
| 43                                   | 55          | 118     | 152     | 252     |
| 256                                  | 302         | 385     | 406     | 481     |
| 758                                  | 794         | 884     | 933     | 941     |
| 1063                                 | 1071        | 1097    | 1114    | 1133    |
| 1175                                 | 1207        | 1282    | 1292    | 1310    |
| 1358                                 | 1375        | 1432    | 1451    | 1457    |
| 1484                                 | 1493        | 1504    | 1519    | 1522    |
| 1523                                 | 1530        | 1535    | 3012    | 3024    |
| 3088                                 | 3099        | 3109    | 3113    | 3117    |
| 3145                                 | 3185        | 3190    | 3192    | 3196    |
| 3227                                 |             |         |         |         |

**SI Table 19: TS R7**

| <b>Optimized geometry (Angstrom)</b> |             |         |         |         |
|--------------------------------------|-------------|---------|---------|---------|
| Atom number                          | Atom Symbol | X       | Y       | Z       |
| 1                                    | C           | -2.047  | -0.564  | 0.4163  |
| 2                                    | C           | -0.3485 | 0.8351  | -0.1491 |
| 3                                    | H           | -0.9226 | 1.6634  | 0.2505  |
| 4                                    | H           | -0.5294 | 0.586   | -1.1905 |
| 5                                    | C           | 0.8096  | 0.4541  | 0.4496  |
| 6                                    | H           | 1.0399  | 0.841   | 1.4415  |
| 7                                    | H           | -1.6208 | -1.5042 | 0.0749  |
| 8                                    | C           | -3.2338 | -0.0379 | -0.3205 |
| 9                                    | H           | -3.47   | 0.9905  | -0.0276 |
| 10                                   | H           | -3.0769 | -0.05   | -1.4042 |
| 11                                   | C           | 1.7638  | -0.5519 | -0.1086 |
| 12                                   | H           | 1.4286  | -0.8587 | -1.1057 |
| 13                                   | H           | 1.7458  | -1.4583 | 0.5139  |
| 14                                   | H           | -2.0292 | -0.4355 | 1.4957  |
| 15                                   | H           | -4.1331 | -0.6399 | -0.1224 |
| 16                                   | C           | 3.1991  | -0.0388 | -0.1784 |
| 17                                   | H           | 3.5591  | 0.2587  | 0.8121  |
| 18                                   | H           | 3.8764  | -0.8081 | -0.561  |
| <b>Frequencies (cm<sup>-1</sup>)</b> |             |         |         |         |
| 41                                   | 58          | 91      | 169     | 178     |
| 224                                  | 245         | 386     | 448     | 566     |
| 725                                  | 797         | 815     | 847     | 879     |
| 919                                  | 975         | 1038    | 1062    | 1068    |
| 1104                                 | 1117        | 1234    | 1247    | 1307    |
| 1328                                 | 1376        | 1434    | 1447    | 1474    |
| 1500                                 | 1508        | 1512    | 1513    | 1521    |
| 1532                                 | 1627        | 3076    | 3081    | 3116    |
| 3142                                 | 3145        | 3183    | 3190    | 3196    |
| 3205                                 | 3220        | 3227    | 3300    | 3321    |
| -483i                                |             |         |         |         |



**SI Table 20: C=CCC**

**Optimized geometry (Angstrom)**

| Atom number | Atom Symbol | X       | Y       | Z       |
|-------------|-------------|---------|---------|---------|
| 1           | C           | 0.718   | -0.3007 | 0.3299  |
| 2           | H           | 0.6673  | -1.2374 | 0.8856  |
| 3           | C           | 1.8521  | 0.0229  | -0.2749 |
| 4           | H           | 1.9485  | 0.9449  | -0.8424 |
| 5           | H           | 2.7262  | -0.6178 | -0.2237 |
| 6           | C           | -0.5377 | 0.5132  | 0.3101  |
| 7           | H           | -0.7902 | 0.8039  | 1.3382  |
| 8           | H           | -0.3619 | 1.442   | -0.2428 |
| 9           | C           | -1.7191 | -0.2399 | -0.2934 |
| 10          | H           | -1.9196 | -1.166  | 0.2556  |
| 11          | H           | -2.6289 | 0.3667  | -0.2653 |
| 12          | H           | -1.5214 | -0.5088 | -1.3353 |

  

| Frequencies (cm <sup>-1</sup> ) |      |      |      |      |
|---------------------------------|------|------|------|------|
| 112                             | 243  | 325  | 446  | 677  |
| 819                             | 892  | 987  | 1014 | 1065 |
| 1077                            | 1132 | 1236 | 1327 | 1353 |
| 1390                            | 1448 | 1487 | 1510 | 1521 |
| 1534                            | 1794 | 3103 | 3117 | 3152 |
| 3192                            | 3199 | 3216 | 3230 | 3320 |

**SI Table 21: C.CCCCCC**

| <b>Optimized geometry (Angstrom)</b> |             |         |         |         |
|--------------------------------------|-------------|---------|---------|---------|
| Atom number                          | Atom Symbol | X       | Y       | Z       |
| 1                                    | C           | -3.2431 | 0.5293  | 0       |
| 2                                    | C           | -4.522  | -0.2299 | 0       |
| 3                                    | H           | -3.1992 | 1.1848  | 0.8788  |
| 4                                    | H           | -3.1992 | 1.1848  | -0.8788 |
| 5                                    | H           | -4.9507 | -0.5944 | -0.928  |
| 6                                    | H           | -4.9507 | -0.5944 | 0.928   |
| 7                                    | C           | -1.9948 | -0.3645 | 0       |
| 8                                    | H           | -2.0242 | -1.0235 | 0.8766  |
| 9                                    | H           | -2.0242 | -1.0235 | -0.8766 |
| 10                                   | C           | -0.6951 | 0.4271  | 0       |
| 11                                   | H           | -0.6735 | 1.0884  | -0.8763 |
| 12                                   | H           | -0.6735 | 1.0884  | 0.8763  |
| 13                                   | C           | 0.5493  | -0.4489 | 0       |
| 14                                   | H           | 0.5268  | -1.1103 | 0.8762  |
| 15                                   | H           | 0.5268  | -1.1103 | -0.8762 |
| 16                                   | C           | 1.8502  | 0.3404  | 0       |
| 17                                   | H           | 1.8736  | 1.002   | -0.8763 |
| 18                                   | H           | 1.8736  | 1.002   | 0.8763  |
| 19                                   | C           | 3.0949  | -0.5355 | 0       |
| 20                                   | H           | 3.071   | -1.1961 | 0.8759  |
| 21                                   | H           | 3.071   | -1.1961 | -0.8759 |
| 22                                   | C           | 4.3894  | 0.2618  | 0       |
| 23                                   | H           | 5.2651  | -0.3937 | 0       |
| 24                                   | H           | 4.4571  | 0.9066  | -0.8828 |
| 25                                   | H           | 4.4571  | 0.9066  | 0.8828  |
| <b>Frequencies (cm<sup>-1</sup>)</b> |             |         |         |         |
| 52                                   | 65          | 81      | 83      | 122     |
| 152                                  | 173         | 200     | 258     | 284     |
| 336                                  | 447         | 486     | 548     | 759     |
| 760                                  | 776         | 824     | 898     | 933     |
| 981                                  | 1018        | 1059    | 1073    | 1075    |
| 1111                                 | 1118        | 1120    | 1175    | 1234    |
| 1264                                 | 1267        | 1313    | 1325    | 1354    |
| 1361                                 | 1374        | 1377    | 1377    | 1418    |
| 1447                                 | 1458        | 1470    | 1494    | 1515    |
| 1515                                 | 1518        | 1520    | 1523    | 1528    |
| 1536                                 | 1542        | 3090    | 3092    | 3096    |
| 3099                                 | 3104        | 3108    | 3112    | 3113    |
| 3119                                 | 3129        | 3137    | 3150    | 3162    |
| 3185                                 | 3191        | 3224    | 3334    |         |

**SI Table 22: TS R8**

| <b>Optimized geometry (Angstrom)</b> |             |         |         |         |
|--------------------------------------|-------------|---------|---------|---------|
| Atom number                          | Atom Symbol | X       | Y       | Z       |
| 1                                    | C           | -1.8388 | 0.7107  | 0.0001  |
| 2                                    | C           | -3.6168 | -0.7134 | -0.0001 |
| 3                                    | H           | -3.2322 | -1.1416 | 0.9195  |
| 4                                    | H           | -3.2322 | -1.1414 | -0.9197 |
| 5                                    | C           | -4.7868 | -0.0277 | 0       |
| 6                                    | H           | -5.2556 | 0.2911  | -0.9255 |
| 7                                    | H           | -5.2557 | 0.2909  | 0.9254  |
| 8                                    | H           | -2.058  | 1.2606  | 0.9124  |
| 9                                    | H           | -2.0579 | 1.2606  | -0.9123 |
| 10                                   | C           | -0.6351 | -0.1761 | 0.0001  |
| 11                                   | H           | -0.6568 | -0.8344 | 0.8781  |
| 12                                   | H           | -0.6569 | -0.8345 | -0.8778 |
| 13                                   | C           | 0.6892  | 0.5934  | 0       |
| 14                                   | H           | 0.7234  | 1.2525  | -0.8766 |
| 15                                   | H           | 0.7234  | 1.2527  | 0.8765  |
| 16                                   | C           | 1.9105  | -0.315  | 0.0001  |
| 17                                   | H           | 1.8717  | -0.9757 | -0.8764 |
| 18                                   | H           | 1.8718  | -0.9755 | 0.8767  |
| 19                                   | C           | 3.2312  | 0.4414  | -0.0001 |
| 20                                   | H           | 3.2689  | 1.1013  | 0.8757  |
| 21                                   | H           | 3.2688  | 1.1011  | -0.8761 |
| 22                                   | C           | 4.4456  | -0.4735 | 0       |
| 23                                   | H           | 4.4526  | -1.1219 | -0.8828 |
| 24                                   | H           | 5.3785  | 0.0975  | -0.0001 |
| 25                                   | H           | 4.4527  | -1.1216 | 0.8829  |
| <b>Frequencies (cm<sup>-1</sup>)</b> |             |         |         |         |
| 37                                   | 46          | 64      | 87      | 124     |
| 162                                  | 163         | 230     | 260     | 304     |
| 381                                  | 399         | 479     | 576     | 759     |
| 771                                  | 802         | 830     | 837     | 878     |
| 932                                  | 933         | 970     | 1037    | 1039    |
| 1050                                 | 1074        | 1111    | 1116    | 1170    |
| 1240                                 | 1269        | 1287    | 1290    | 1322    |
| 1346                                 | 1367        | 1367    | 1375    | 1423    |
| 1454                                 | 1462        | 1488    | 1500    | 1514    |
| 1517                                 | 1520        | 1524    | 1532    | 1540    |
| 1615                                 | 3091        | 3096    | 3100    | 3107    |
| 3113                                 | 3117        | 3126    | 3140    | 3158    |
| 3185                                 | 3191        | 3200    | 3225    | 3237    |
| 3296                                 | 3313        | 3339    | -440i   |         |

**SI Table 23: CC.CCCCCC**

| <b>Optimized geometry (Angstrom)</b> |             |         |         |         |
|--------------------------------------|-------------|---------|---------|---------|
| Atom number                          | Atom Symbol | X       | Y       | Z       |
| 1                                    | C           | -1.876  | 0.3468  | -0.0255 |
| 2                                    | H           | -1.8845 | 0.9444  | -0.9469 |
| 3                                    | H           | -1.9104 | 1.0691  | 0.8012  |
| 4                                    | C           | -0.5777 | -0.4428 | 0.05    |
| 5                                    | H           | -0.545  | -1.1655 | -0.7761 |
| 6                                    | H           | -0.5694 | -1.0396 | 0.9718  |
| 7                                    | C           | 0.6683  | 0.4286  | 0.0041  |
| 8                                    | H           | 0.6656  | 1.0237  | -0.9176 |
| 9                                    | H           | 0.638   | 1.1504  | 0.8306  |
| 10                                   | C           | 1.9673  | -0.3633 | 0.0821  |
| 11                                   | H           | 1.9589  | -0.9712 | 1.0053  |
| 12                                   | H           | 2.0025  | -1.0982 | -0.7354 |
| 13                                   | C           | 3.1937  | 0.4794  | 0.0442  |
| 14                                   | H           | 3.1265  | 1.4995  | 0.4157  |
| 15                                   | C           | -3.123  | -0.5245 | 0.0183  |
| 16                                   | H           | -3.1142 | -1.1209 | 0.9395  |
| 17                                   | H           | -3.088  | -1.246  | -0.8077 |
| 18                                   | C           | -4.4152 | 0.2731  | -0.0584 |
| 19                                   | H           | -4.4678 | 0.8526  | -0.9863 |
| 20                                   | H           | -5.2926 | -0.3792 | -0.0243 |
| 21                                   | H           | -4.494  | 0.9799  | 0.7745  |
| 22                                   | C           | 4.5391  | -0.129  | -0.1239 |
| 23                                   | H           | 4.539   | -0.893  | -0.9106 |
| 24                                   | H           | 5.2973  | 0.6177  | -0.3756 |
| 25                                   | H           | 4.8789  | -0.6331 | 0.7962  |
| <b>Frequencies (cm<sup>-1</sup>)</b> |             |         |         |         |
| 42                                   | 69          | 79      | 87      | 121     |
| 152                                  | 158         | 204     | 259     | 287     |
| 345                                  | 411         | 485     | 487     | 758     |
| 765                                  | 811         | 904     | 926     | 944     |
| 995                                  | 1029        | 1052    | 1071    | 1109    |
| 1116                                 | 1121        | 1148    | 1178    | 1206    |
| 1255                                 | 1279        | 1309    | 1330    | 1352    |
| 1367                                 | 1374        | 1385    | 1428    | 1445    |
| 1456                                 | 1468        | 1477    | 1496    | 1503    |
| 1511                                 | 1515        | 1516    | 1523    | 1523    |
| 1533                                 | 1541        | 3013    | 3046    | 3087    |
| 3091                                 | 3092        | 3101    | 3105    | 3112    |
| 3114                                 | 3124        | 3130    | 3141    | 3155    |
| 3185                                 | 3189        | 3191    | 3242    |         |

**SI Table 24: TS R9**

| <b>Optimized geometry (Angstrom)</b> |             |         |         |         |
|--------------------------------------|-------------|---------|---------|---------|
| Atom number                          | Atom Symbol | X       | Y       | Z       |
| 1                                    | C           | 0.7582  | -0.797  | 0.0728  |
| 2                                    | C           | 2.7036  | 0.2542  | -0.3834 |
| 3                                    | H           | 2.4147  | 0.212   | -1.431  |
| 4                                    | C           | 2.6326  | 1.4631  | 0.2403  |
| 5                                    | H           | 3.0376  | 1.6045  | 1.2384  |
| 6                                    | H           | 0.8772  | -1.6061 | -0.6465 |
| 7                                    | H           | 0.968   | -1.0861 | 1.101   |
| 8                                    | C           | 3.6382  | -0.8272 | 0.0816  |
| 9                                    | H           | 3.7855  | -0.7816 | 1.1644  |
| 10                                   | H           | 3.2754  | -1.8262 | -0.171  |
| 11                                   | H           | 4.6196  | -0.7073 | -0.3916 |
| 12                                   | H           | 2.0963  | 2.2959  | -0.2008 |
| 13                                   | C           | -0.3735 | 0.1519  | -0.1507 |
| 14                                   | H           | -0.2555 | 1.0209  | 0.5074  |
| 15                                   | H           | -0.3367 | 0.5373  | -1.1782 |
| 16                                   | C           | -1.7514 | -0.4692 | 0.0901  |
| 17                                   | H           | -1.8812 | -1.3358 | -0.571  |
| 18                                   | H           | -1.798  | -0.8605 | 1.1146  |
| 19                                   | C           | -2.8966 | 0.5098  | -0.1296 |
| 20                                   | H           | -2.8434 | 0.9031  | -1.1526 |
| 21                                   | H           | -2.7635 | 1.3741  | 0.5331  |
| 22                                   | C           | -4.2658 | -0.1073 | 0.1076  |
| 23                                   | H           | -5.0674 | 0.6187  | -0.057  |
| 24                                   | H           | -4.4405 | -0.9534 | -0.5655 |
| 25                                   | H           | -4.3599 | -0.4792 | 1.1334  |
| <b>Frequencies (cm<sup>-1</sup>)</b> |             |         |         |         |
| 42                                   | 49          | 75      | 126     | 135     |
| 175                                  | 195         | 226     | 260     | 290     |
| 404                                  | 427         | 437     | 565     | 579     |
| 760                                  | 791         | 825     | 857     | 891     |
| 930                                  | 949         | 965     | 1014    | 1018    |
| 1046                                 | 1076        | 1107    | 1118    | 1163    |
| 1216                                 | 1242        | 1302    | 1304    | 1312    |
| 1362                                 | 1366        | 1394    | 1435    | 1445    |
| 1456                                 | 1473        | 1499    | 1510    | 1514    |
| 1515                                 | 1521        | 1523    | 1527    | 1538    |
| 1613                                 | 3096        | 3098    | 3106    | 3113    |
| 3115                                 | 3123        | 3137    | 3156    | 3180    |
| 3184                                 | 3186        | 3190    | 3206    | 3226    |
| 3238                                 | 3281        | 3327    | -488i   |         |

**SI Table 25: C.CCCC**

**Optimized geometry (Angstrom)**

| Atom number                     | Atom Symbol | X       | Y       | Z       |
|---------------------------------|-------------|---------|---------|---------|
| 1                               | C           | -2.4751 | -0.3175 | 0       |
| 2                               | H           | -2.5271 | -0.9633 | -0.8829 |
| 3                               | H           | -2.5271 | -0.9633 | 0.8829  |
| 4                               | C           | -1.2004 | 0.5113  | 0       |
| 5                               | H           | -1.1919 | 1.1719  | -0.8761 |
| 6                               | H           | -1.1919 | 1.1719  | 0.8761  |
| 7                               | C           | 0.0638  | -0.3361 | 0       |
| 8                               | H           | 0.0639  | -0.9959 | 0.8768  |
| 9                               | H           | 0.0639  | -0.9959 | -0.8768 |
| 10                              | C           | 1.349   | 0.5033  | 0       |
| 11                              | H           | 1.3325  | 1.16    | 0.8789  |
| 12                              | H           | 1.3325  | 1.16    | -0.8789 |
| 13                              | C           | 2.5952  | -0.3082 | 0       |
| 14                              | H           | 3.008   | -0.6897 | -0.9283 |
| 15                              | H           | 3.008   | -0.6897 | 0.9283  |
| 16                              | H           | -3.3659 | 0.3173  | 0       |
| Frequencies (cm <sup>-1</sup> ) |             |         |         |         |
| 71                              | 122         | 128     | 184     | 258     |
| 372                             | 412         | 531     | 759     | 784     |
| 879                             | 933         | 1008    | 1027    | 1105    |
| 1116                            | 1153        | 1232    | 1296    | 1303    |
| 1362                            | 1367        | 1389    | 1442    | 1456    |
| 1493                            | 1516        | 1517    | 1523    | 1527    |
| 1539                            | 3097        | 3101    | 3108    | 3113    |
| 3125                            | 3136        | 3158    | 3186    | 3191    |
| 3224                            | 3334        |         |         |         |

**SI Table 26: CCC.CCCCC**

| <b>Optimized geometry (Angstrom)</b> |             |         |         |         |
|--------------------------------------|-------------|---------|---------|---------|
| Atom number                          | Atom Symbol | X       | Y       | Z       |
| 1                                    | C           | -1.0284 | -0.0454 | 0.4419  |
| 2                                    | C           | -0.3644 | -1.0637 | -0.4197 |
| 3                                    | C           | 0.975   | -1.5924 | 0.0985  |
| 4                                    | C           | 2.2903  | 0.6388  | 0.4943  |
| 5                                    | C           | 2.2198  | -0.7434 | -0.164  |
| 6                                    | H           | -0.885  | -0.1221 | 1.5185  |
| 7                                    | H           | -0.2433 | -0.6687 | -1.4383 |
| 8                                    | H           | 0.8864  | -1.7775 | 1.1773  |
| 9                                    | H           | 1.7932  | 0.6056  | 1.4713  |
| 10                                   | H           | -1.0436 | -1.9273 | -0.5338 |
| 11                                   | H           | 1.1525  | -2.5734 | -0.356  |
| 12                                   | H           | 3.3415  | 0.8688  | 0.703   |
| 13                                   | H           | 3.0773  | -1.3333 | 0.1794  |
| 14                                   | H           | 2.3567  | -0.631  | -1.2481 |
| 15                                   | C           | -2.1693 | 0.7786  | -0.0521 |
| 16                                   | H           | -2.2252 | 1.7115  | 0.5215  |
| 17                                   | H           | -1.9905 | 1.0659  | -1.0961 |
| 18                                   | C           | -3.5249 | 0.0679  | 0.0379  |
| 19                                   | H           | -4.3304 | 0.7112  | -0.3302 |
| 20                                   | H           | -3.5317 | -0.8508 | -0.5568 |
| 21                                   | H           | -3.7575 | -0.2042 | 1.0722  |
| 22                                   | C           | 1.7158  | 1.7763  | -0.3392 |
| 23                                   | H           | 0.6536  | 1.6317  | -0.5505 |
| 24                                   | H           | 1.8213  | 2.735   | 0.1781  |
| 25                                   | H           | 2.2407  | 1.8589  | -1.2973 |
| <b>Frequencies (cm<sup>-1</sup>)</b> |             |         |         |         |
| 30                                   | 51          | 74      | 97      | 136     |
| 214                                  | 227         | 274     | 297     | 324     |
| 363                                  | 416         | 489     | 534     | 762     |
| 788                                  | 819         | 851     | 905     | 916     |
| 960                                  | 1010        | 1017    | 1073    | 1089    |
| 1099                                 | 1134        | 1164    | 1187    | 1209    |
| 1238                                 | 1286        | 1310    | 1337    | 1348    |
| 1365                                 | 1392        | 1413    | 1438    | 1441    |
| 1443                                 | 1452        | 1474    | 1492    | 1508    |
| 1509                                 | 1516        | 1518    | 1521    | 1526    |
| 1533                                 | 1535        | 3014    | 3093    | 3096    |
| 3100                                 | 3104        | 3108    | 3114    | 3117    |
| 3139                                 | 3140        | 3144    | 3147    | 3183    |
| 3190                                 | 3195        | 3210    | 3228    |         |

**SI Table 27: TS R10**

| <b>Optimized geometry (Angstrom)</b> |             |         |         |         |
|--------------------------------------|-------------|---------|---------|---------|
| Atom number                          | Atom Symbol | X       | Y       | Z       |
| 1                                    | C           | -4.4885 | 0.9187  | -0.0978 |
| 2                                    | C           | -2.9833 | -0.6933 | 0.5234  |
| 3                                    | H           | -3.7552 | -1.4425 | 0.3917  |
| 4                                    | H           | -2.9291 | -0.2256 | 1.5013  |
| 5                                    | C           | -1.915  | -0.6557 | -0.3117 |
| 6                                    | H           | -1.9423 | -1.2503 | -1.2238 |
| 7                                    | H           | -5.2542 | 0.7492  | 0.6538  |
| 8                                    | H           | -4.7292 | 0.6163  | -1.1118 |
| 9                                    | H           | -3.8971 | 1.8225  | 0.0081  |
| 10                                   | C           | -0.7209 | 0.223   | -0.1272 |
| 11                                   | H           | -0.6934 | 0.9764  | -0.9284 |
| 12                                   | H           | -0.8155 | 0.7786  | 0.8132  |
| 13                                   | C           | 0.6007  | -0.543  | -0.141  |
| 14                                   | H           | 0.5939  | -1.2845 | 0.6672  |
| 15                                   | H           | 0.6764  | -1.1145 | -1.0754 |
| 16                                   | C           | 1.8198  | 0.356   | 0.0001  |
| 17                                   | H           | 1.822   | 1.0953  | -0.8122 |
| 18                                   | H           | 1.7402  | 0.9327  | 0.9314  |
| 19                                   | C           | 3.1392  | -0.4025 | -0.0082 |
| 20                                   | H           | 3.2176  | -0.9796 | -0.9383 |
| 21                                   | H           | 3.1363  | -1.1397 | 0.8045  |
| 22                                   | C           | 4.3523  | 0.5032  | 0.1314  |
| 23                                   | H           | 4.3189  | 1.0679  | 1.0693  |
| 24                                   | H           | 5.2842  | -0.0695 | 0.1221  |
| 25                                   | H           | 4.4004  | 1.2294  | -0.6871 |
| <b>Frequencies (cm<sup>-1</sup>)</b> |             |         |         |         |
| 39                                   | 60          | 62      | 98      | 119     |
| 133                                  | 149         | 215     | 259     | 329     |
| 342                                  | 451         | 471     | 511     | 531     |
| 730                                  | 760         | 784     | 815     | 869     |
| 926                                  | 952         | 967     | 992     | 1016    |
| 1056                                 | 1083        | 1096    | 1117    | 1168    |
| 1232                                 | 1270        | 1288    | 1314    | 1333    |
| 1363                                 | 1366        | 1370    | 1424    | 1441    |
| 1445                                 | 1453        | 1464    | 1479    | 1508    |
| 1516                                 | 1518        | 1523    | 1531    | 1540    |
| 1633                                 | 3075        | 3091    | 3099    | 3106    |
| 3113                                 | 3117        | 3129    | 3141    | 3157    |
| 3168                                 | 3185        | 3191    | 3224    | 3232    |
| 3328                                 | 3337        | 3345    | -476i   |         |



**SI Table 28: C=CCCCC**

| Optimized geometry (Angstrom)   |             |         |         |         |
|---------------------------------|-------------|---------|---------|---------|
| Atom number                     | Atom Symbol | X       | Y       | Z       |
| 1                               | C           | -2.6876 | 0.2126  | 0.3299  |
| 2                               | H           | -2.7804 | 0.9885  | 1.0899  |
| 3                               | C           | -3.7021 | 0.0051  | -0.4976 |
| 4                               | H           | -3.6549 | -0.7557 | -1.2723 |
| 5                               | H           | -4.6174 | 0.5838  | -0.4304 |
| 6                               | C           | -1.3878 | -0.5278 | 0.3094  |
| 7                               | H           | -1.2545 | -1.0452 | 1.2693  |
| 8                               | H           | -1.4205 | -1.3053 | -0.4619 |
| 9                               | C           | -0.1846 | 0.3831  | 0.0759  |
| 10                              | H           | -0.1722 | 1.1702  | 0.8413  |
| 11                              | H           | -0.3064 | 0.8975  | -0.8852 |
| 12                              | C           | 1.1435  | -0.3586 | 0.0944  |
| 13                              | H           | 1.2592  | -0.8731 | 1.0578  |
| 14                              | H           | 1.1287  | -1.1486 | -0.6684 |
| 15                              | C           | 2.3466  | 0.5432  | -0.1409 |
| 16                              | H           | 2.2293  | 1.0569  | -1.1034 |
| 17                              | H           | 2.3609  | 1.3319  | 0.6218  |
| 18                              | C           | 3.6696  | -0.2058 | -0.1223 |
| 19                              | H           | 4.5143  | 0.4675  | -0.2938 |
| 20                              | H           | 3.8302  | -0.7018 | 0.8409  |
| 21                              | H           | 3.6979  | -0.9785 | -0.8979 |
| Frequencies (cm <sup>-1</sup> ) |             |         |         |         |
| 62                              | 73          | 118     | 137     | 155     |
| 259                             | 283         | 342     | 448     | 470     |
| 679                             | 761         | 786     | 873     | 928     |
| 974                             | 986         | 997     | 1057    | 1068    |
| 1088                            | 1098        | 1118    | 1172    | 1234    |
| 1272                            | 1290        | 1332    | 1352    | 1366    |
| 1370                            | 1374        | 1428    | 1454    | 1465    |
| 1487                            | 1510        | 1516    | 1519    | 1523    |
| 1531                            | 1540        | 1794    | 3090    | 3095    |
| 3099                            | 3106        | 3112    | 3117    | 3132    |
| 3144                            | 3160        | 3185    | 3191    | 3217    |
| 3230                            | 3320        |         |         |         |

**SI Table 29: CCCC.CCCC**

| Optimized geometry (Angstrom)   |             |         |         |         |
|---------------------------------|-------------|---------|---------|---------|
| Atom number                     | Atom Symbol | X       | Y       | Z       |
| 1                               | C           | 1.1945  | 0.0444  | 0.6316  |
| 2                               | C           | 0.4841  | -0.6031 | -0.5501 |
| 3                               | C           | 3.5457  | 0.0005  | -0.306  |
| 4                               | C           | 2.4395  | 0.8347  | 0.2336  |
| 5                               | H           | 1.4793  | -0.7327 | 1.3539  |
| 6                               | H           | 0.1672  | 0.1757  | -1.254  |
| 7                               | H           | 3.7084  | -1.0051 | 0.0712  |
| 8                               | H           | 2.1682  | 1.6095  | -0.4956 |
| 9                               | H           | 4.3209  | 0.4366  | -0.9266 |
| 10                              | H           | 0.5081  | 0.7133  | 1.1607  |
| 11                              | H           | 2.7987  | 1.3885  | 1.1178  |
| 12                              | C           | -0.7003 | -1.4897 | -0.1734 |
| 13                              | H           | -1.0793 | -1.9669 | -1.0857 |
| 14                              | H           | -0.3289 | -2.3077 | 0.4573  |
| 15                              | C           | -1.881  | -0.8371 | 0.5485  |
| 16                              | H           | -2.5681 | -1.6459 | 0.8214  |
| 17                              | H           | -1.5522 | -0.4011 | 1.5002  |
| 18                              | C           | -2.6676 | 0.211   | -0.2452 |
| 19                              | H           | -3.7032 | 0.2103  | 0.1134  |
| 20                              | H           | -2.7196 | -0.0963 | -1.2979 |
| 21                              | C           | -2.143  | 1.6382  | -0.1507 |
| 22                              | H           | -2.1179 | 1.9753  | 0.8914  |
| 23                              | H           | -1.1324 | 1.741   | -0.5532 |
| 24                              | H           | -2.7876 | 2.3288  | -0.7033 |
| 25                              | H           | 1.2069  | -1.2166 | -1.1005 |
| Frequencies (cm <sup>-1</sup> ) |             |         |         |         |
| 42                              | 67          | 70      | 137     | 150     |
| 195                             | 227         | 251     | 270     | 362     |
| 377                             | 451         | 487     | 517     | 762     |
| 768                             | 819         | 845     | 874     | 909     |
| 944                             | 968         | 1005    | 1053    | 1092    |
| 1096                            | 1137        | 1150    | 1166    | 1196    |
| 1237                            | 1260        | 1284    | 1340    | 1347    |
| 1364                            | 1383        | 1413    | 1418    | 1440    |
| 1449                            | 1454        | 1462    | 1490    | 1495    |
| 1508                            | 1514        | 1518    | 1521    | 1528    |
| 1533                            | 1537        | 3031    | 3094    | 3099    |
| 3103                            | 3107        | 3113    | 3116    | 3119    |
| 3132                            | 3141        | 3145    | 3150    | 3165    |
| 3184                            | 3208        | 3221    | 3331    |         |

**SI Table 30: TS R11**

| Optimized geometry (Angstrom)   |             |         |         |         |
|---------------------------------|-------------|---------|---------|---------|
| Atom number                     | Atom Symbol | X       | Y       | Z       |
| 1                               | C           | 0.5657  | -0.387  | 0.4876  |
| 2                               | C           | 2.3549  | 0.8926  | -0.0928 |
| 3                               | H           | 1.9206  | 1.7205  | 0.456   |
| 4                               | H           | 2.05    | 0.794   | -1.1302 |
| 5                               | C           | 3.512   | 0.3234  | 0.3333  |
| 6                               | H           | 3.8731  | 0.5586  | 1.3326  |
| 7                               | H           | 0.8449  | -1.316  | -0.0051 |
| 8                               | C           | -0.6226 | 0.3448  | -0.0496 |
| 9                               | H           | -0.6652 | 1.3532  | 0.382   |
| 10                              | H           | -0.5176 | 0.4803  | -1.1339 |
| 11                              | C           | 4.2794  | -0.7013 | -0.4323 |
| 12                              | H           | 3.8626  | -0.849  | -1.4327 |
| 13                              | H           | 5.3314  | -0.4127 | -0.5431 |
| 14                              | H           | 4.2761  | -1.6722 | 0.08    |
| 15                              | H           | 0.698   | -0.4023 | 1.5672  |
| 16                              | C           | -1.9538 | -0.3602 | 0.226   |
| 17                              | H           | -2.0732 | -0.4971 | 1.3084  |
| 18                              | H           | -1.9246 | -1.3688 | -0.2057 |
| 19                              | C           | -3.1571 | 0.3921  | -0.3253 |
| 20                              | H           | -3.0314 | 0.5306  | -1.4066 |
| 21                              | H           | -3.1812 | 1.4004  | 0.1071  |
| 22                              | C           | -4.4781 | -0.3098 | -0.0528 |
| 23                              | H           | -4.647  | -0.4316 | 1.0224  |
| 24                              | H           | -5.3232 | 0.253   | -0.4598 |
| 25                              | H           | -4.4959 | -1.308  | -0.5029 |
| Frequencies (cm <sup>-1</sup> ) |             |         |         |         |
| 27                              | 42          | 65      | 110     | 125     |
| 134                             | 157         | 206     | 259     | 268     |
| 399                             | 424         | 438     | 556     | 687     |
| 759                             | 788         | 806     | 890     | 922     |
| 943                             | 954         | 975     | 1017    | 1020    |
| 1044                            | 1072        | 1107    | 1109    | 1162    |
| 1222                            | 1241        | 1302    | 1306    | 1316    |
| 1363                            | 1367        | 1394    | 1433    | 1444    |
| 1456                            | 1469        | 1500    | 1501    | 1512    |
| 1515                            | 1517        | 1523    | 1526    | 1538    |
| 1631                            | 3092        | 3095    | 3098    | 3105    |
| 3113                            | 3121        | 3131    | 3148    | 3154    |
| 3186                            | 3190        | 3191    | 3196    | 3223    |
| 3238                            | 3291        | 3323    | -456i   |         |

**SI Table 31: C=CCCC**

| <b>Optimized geometry (Angstrom)</b> |             |         |         |         |
|--------------------------------------|-------------|---------|---------|---------|
| Atom number                          | Atom Symbol | X       | Y       | Z       |
| 1                                    | C           | -1.4091 | 0.3408  | 0.2653  |
| 2                                    | H           | -1.4897 | 1.3614  | 0.6399  |
| 3                                    | C           | -2.4707 | -0.2176 | -0.2988 |
| 4                                    | H           | -2.4377 | -1.2317 | -0.6884 |
| 5                                    | H           | -3.4118 | 0.3146  | -0.3894 |
| 6                                    | C           | -0.0718 | -0.3095 | 0.4279  |
| 7                                    | H           | 0.1695  | -0.3729 | 1.498   |
| 8                                    | H           | -0.1164 | -1.3399 | 0.0569  |
| 9                                    | C           | 1.0513  | 0.446   | -0.2795 |
| 10                                   | H           | 1.0747  | 1.4808  | 0.0846  |
| 11                                   | H           | 0.8213  | 0.5059  | -1.3496 |
| 12                                   | C           | 2.4141  | -0.1964 | -0.0781 |
| 13                                   | H           | 3.1994  | 0.3623  | -0.5953 |
| 14                                   | H           | 2.6795  | -0.2384 | 0.9836  |
| 15                                   | H           | 2.4286  | -1.2221 | -0.4614 |
| 16                                   | C           | -1.4091 | 0.3408  | 0.2653  |
| <b>Frequencies (cm<sup>-1</sup>)</b> |             |         |         |         |
| 101                                  | 108         | 237     | 260     | 397     |
| 447                                  | 668         | 775     | 901     | 921     |
| 987                                  | 990         | 1057    | 1075    | 1102    |
| 1155                                 | 1234        | 1302    | 1331    | 1358    |
| 1369                                 | 1432        | 1455    | 1487    | 1511    |
| 1520                                 | 1523        | 1536    | 1794    | 3092    |
| 3109                                 | 3113        | 3136    | 3155    | 3186    |
| 3193                                 | 3217        | 3230    | 3320    |         |

**SI Table 32: TS R12**

| Optimized geometry (Angstrom)   |             |         |         |         |
|---------------------------------|-------------|---------|---------|---------|
| Atom number                     | Atom Symbol | X       | Y       | Z       |
| 1                               | C           | -3.2872 | -0.4937 | 0.5208  |
| 2                               | C           | -1.6733 | 0.8253  | -0.3828 |
| 3                               | H           | -2.349  | 1.6703  | -0.3124 |
| 4                               | H           | -1.7414 | 0.2331  | -1.2904 |
| 5                               | C           | -0.5433 | 0.7893  | 0.3699  |
| 6                               | H           | -0.4351 | 1.5006  | 1.1875  |
| 7                               | H           | -3.3791 | -0.0182 | 1.4942  |
| 8                               | H           | -2.7514 | -1.4396 | 0.5386  |
| 9                               | C           | -4.4432 | -0.3747 | -0.4161 |
| 10                              | H           | -5.3008 | -0.9763 | -0.08   |
| 11                              | H           | -4.7942 | 0.6593  | -0.4981 |
| 12                              | H           | -4.1873 | -0.7225 | -1.4225 |
| 13                              | C           | 0.5388  | -0.2315 | 0.229   |
| 14                              | H           | 0.3166  | -0.8864 | -0.6218 |
| 15                              | H           | 0.5526  | -0.8789 | 1.1188  |
| 16                              | C           | 1.9286  | 0.3784  | 0.0577  |
| 17                              | H           | 2.1379  | 1.0444  | 0.9053  |
| 18                              | H           | 1.9342  | 1.0153  | -0.8356 |
| 19                              | C           | 3.0343  | -0.6615 | -0.0498 |
| 20                              | H           | 3.0208  | -1.2966 | 0.8451  |
| 21                              | H           | 2.8217  | -1.3278 | -0.8953 |
| 22                              | C           | 4.4161  | -0.0504 | -0.2193 |
| 23                              | H           | 5.1894  | -0.8206 | -0.2927 |
| 24                              | H           | 4.4697  | 0.5617  | -1.1258 |
| 25                              | H           | 4.6698  | 0.5954  | 0.6281  |
| Frequencies (cm <sup>-1</sup> ) |             |         |         |         |
| 32                              | 39          | 66      | 99      | 129     |
| 149                             | 172         | 178     | 255     | 264     |
| 374                             | 410         | 471     | 566     | 724     |
| 762                             | 801         | 819     | 847     | 904     |
| 935                             | 943         | 964     | 1014    | 1062    |
| 1069                            | 1079        | 1105    | 1112    | 1160    |
| 1232                            | 1247        | 1280    | 1302    | 1313    |
| 1351                            | 1367        | 1392    | 1435    | 1447    |
| 1458                            | 1476        | 1499    | 1508    | 1512    |
| 1513                            | 1516        | 1523    | 1526    | 1538    |
| 1627                            | 3071        | 3076    | 3098    | 3104    |
| 3113                            | 3123        | 3133    | 3145    | 3154    |
| 3183                            | 3185        | 3191    | 3205    | 3220    |
| 3228                            | 3300        | 3321    | -483i   |         |

**SI Table 33: C=CCCC**

| <b>Optimized geometry (Angstrom)</b> |             |         |         |         |
|--------------------------------------|-------------|---------|---------|---------|
| Atom number                          | Atom Symbol | X       | Y       | Z       |
| 1                                    | C           | 2.0304  | -0.2131 | 0.3813  |
| 2                                    | H           | 2.0704  | -0.886  | 1.238   |
| 3                                    | C           | 3.0698  | -0.1626 | -0.4397 |
| 4                                    | H           | 3.075   | 0.4913  | -1.3078 |
| 5                                    | H           | 3.9544  | -0.7687 | -0.2741 |
| 6                                    | C           | 0.7688  | 0.5768  | 0.2311  |
| 7                                    | H           | 0.642   | 1.221   | 1.1119  |
| 8                                    | H           | 0.8547  | 1.2445  | -0.6335 |
| 9                                    | C           | -0.4726 | -0.3002 | 0.0865  |
| 10                                   | H           | -0.5394 | -0.9797 | 0.9466  |
| 11                                   | H           | -0.3583 | -0.9406 | -0.797  |
| 12                                   | C           | -1.7632 | 0.4982  | -0.0251 |
| 13                                   | H           | -1.8699 | 1.1375  | 0.8605  |
| 14                                   | H           | -1.6926 | 1.1798  | -0.8821 |
| 15                                   | C           | -2.997  | -0.3777 | -0.1724 |
| 16                                   | H           | -3.9078 | 0.2227  | -0.2511 |
| 17                                   | H           | -2.9331 | -1.0037 | -1.0688 |
| 18                                   | H           | -3.1129 | -1.0463 | 0.6873  |
| <b>Frequencies (cm<sup>-1</sup>)</b> |             |         |         |         |
| 77                                   | 96          | 135     | 179     | 258     |
| 365                                  | 370         | 471     | 674     | 764     |
| 823                                  | 936         | 953     | 974     | 988     |
| 1064                                 | 1072        | 1085    | 1113    | 1166    |
| 1234                                 | 1283        | 1306    | 1351    | 1357    |
| 1370                                 | 1399        | 1449    | 1459    | 1487    |
| 1511                                 | 1516        | 1523    | 1527    | 1539    |
| 1794                                 | 3093        | 3098    | 3105    | 3113    |
| 3125                                 | 3139        | 3158    | 3186    | 3192    |
| 3217                                 | 3230        | 3320    |         |         |

**SI Table 34:** Potential energy data along the MEP for reaction  $\text{CCC}\cdot \rightarrow \text{C}\cdot + \text{C}=\text{C}$ . All data calculated with GAUSSIAN 03 program at the CCSD(T)/cc-pVDZ//BH&HLYP/cc-pVDZ level of theory.

| Reaction $\text{CCC}\cdot \rightarrow \text{C}\cdot + \text{C}=\text{C}$      |                 |                  |                              |                                      |                                                |
|-------------------------------------------------------------------------------|-----------------|------------------|------------------------------|--------------------------------------|------------------------------------------------|
| $E_{\text{CCC}} = -118.393126$ hartree $ZPE_{\text{CCC}} = 0.0904996$ hartree |                 |                  |                              |                                      |                                                |
| Reaction coordinate<br>(amu <sup>1/2</sup><br>bohr)                           | $V_c$ (Hartree) | ZPE<br>(Hartree) | $V_{\text{ag}}$<br>(Hartree) | $V_c - E_{\text{CCC}}$<br>(kcal/mol) | $V_{\text{ag}} - E_{\text{CCC}}$<br>(kcal/mol) |
| -3.0791                                                                       | -118.10905      | 0.08818          | -118.02087                   | 2.6740                               | 1.1146                                         |
| -3.0591                                                                       | -118.10879      | 0.08816          | -118.02063                   | 2.8363                               | 1.2663                                         |
| -3.0391                                                                       | -118.10852      | 0.08815          | -118.02038                   | 3.0033                               | 1.4232                                         |
| -3.0191                                                                       | -118.10825      | 0.08813          | -118.02012                   | 3.1757                               | 1.5856                                         |
| -2.9991                                                                       | -118.10797      | 0.08811          | -118.01985                   | 3.3528                               | 1.7526                                         |
| -2.9791                                                                       | -118.10768      | 0.08810          | -118.01958                   | 3.5344                               | 1.9248                                         |
| -2.9591                                                                       | -118.10738      | 0.08808          | -118.01930                   | 3.7208                               | 2.1019                                         |
| -2.9391                                                                       | -118.10708      | 0.08807          | -118.01901                   | 3.9117                               | 2.2840                                         |
| -2.9191                                                                       | -118.10677      | 0.08806          | -118.01871                   | 4.1070                               | 2.4705                                         |
| -2.8991                                                                       | -118.10645      | 0.08804          | -118.01840                   | 4.3069                               | 2.6622                                         |
| -2.8791                                                                       | -118.10612      | 0.08803          | -118.01809                   | 4.5108                               | 2.8573                                         |
| -2.8591                                                                       | -118.10579      | 0.08802          | -118.01778                   | 4.7183                               | 3.0567                                         |
| -2.8391                                                                       | -118.10545      | 0.08800          | -118.01745                   | 4.9309                               | 3.2610                                         |
| -2.8191                                                                       | -118.10511      | 0.08799          | -118.01712                   | 5.1467                               | 3.4693                                         |
| -2.7991                                                                       | -118.10476      | 0.08798          | -118.01678                   | 5.3663                               | 3.6808                                         |
| -2.7791                                                                       | -118.10440      | 0.08797          | -118.01644                   | 5.5894                               | 3.8964                                         |
| -2.7591                                                                       | -118.10404      | 0.08795          | -118.01609                   | 5.8163                               | 4.1158                                         |
| -2.7391                                                                       | -118.10367      | 0.08794          | -118.01573                   | 6.0467                               | 4.3387                                         |
| -2.7191                                                                       | -118.10330      | 0.08793          | -118.01537                   | 6.2803                               | 4.5647                                         |
| -2.6991                                                                       | -118.10292      | 0.08792          | -118.01501                   | 6.5172                               | 4.7947                                         |
| -2.6791                                                                       | -118.10254      | 0.08791          | -118.01463                   | 6.7579                               | 5.0279                                         |
| -2.6591                                                                       | -118.10215      | 0.08790          | -118.01426                   | 7.0011                               | 5.2642                                         |
| -2.6391                                                                       | -118.10176      | 0.08788          | -118.01388                   | 7.2469                               | 5.5024                                         |
| -2.6191                                                                       | -118.10136      | 0.08787          | -118.01349                   | 7.4968                               | 5.7454                                         |
| -2.5991                                                                       | -118.10096      | 0.08786          | -118.01310                   | 7.7484                               | 5.9901                                         |
| -2.5791                                                                       | -118.10056      | 0.08785          | -118.01271                   | 8.0028                               | 6.2383                                         |
| -2.5591                                                                       | -118.10015      | 0.08784          | -118.01231                   | 8.2605                               | 6.4890                                         |
| -2.5391                                                                       | -118.09973      | 0.08783          | -118.01190                   | 8.5201                               | 6.7418                                         |
| -2.5191                                                                       | -118.09931      | 0.08782          | -118.01150                   | 8.7821                               | 6.9975                                         |
| -2.4991                                                                       | -118.09889      | 0.08781          | -118.01108                   | 9.0468                               | 7.2553                                         |

|          |            |         |            |         |         |
|----------|------------|---------|------------|---------|---------|
| -2.4791  | -118.09847 | 0.08780 | -118.01067 | 9.3133  | 7.5155  |
| -2.4591  | -118.09804 | 0.08779 | -118.01025 | 9.5825  | 7.7778  |
| -2.4391  | -118.09761 | 0.08778 | -118.00983 | 9.8534  | 8.0424  |
| -2.4191  | -118.09717 | 0.08777 | -118.00941 | 10.1262 | 8.3089  |
| -2.3991  | -118.09673 | 0.08776 | -118.00898 | 10.4012 | 8.5776  |
| -2.3791  | -118.09629 | 0.08775 | -118.00855 | 10.6778 | 8.8480  |
| -2.3591  | -118.09585 | 0.08774 | -118.00811 | 10.9566 | 9.1205  |
| -2.3391  | -118.09540 | 0.08773 | -118.00768 | 11.2368 | 9.3944  |
| -2.3191  | -118.09495 | 0.08772 | -118.00724 | 11.5183 | 9.6703  |
| -2.29911 | -118.09450 | 0.08771 | -118.00680 | 11.8012 | 9.9469  |
| -2.27911 | -118.09405 | 0.08770 | -118.00635 | 12.0860 | 10.2255 |
| -2.25911 | -118.09359 | 0.08769 | -118.00591 | 12.3717 | 10.5055 |
| -2.23911 | -118.09314 | 0.08768 | -118.00546 | 12.6592 | 10.7868 |
| -2.21911 | -118.09268 | 0.08767 | -118.00501 | 12.9471 | 11.0690 |
| -2.19911 | -118.09222 | 0.08766 | -118.00456 | 13.2365 | 11.3528 |
| -2.17911 | -118.09175 | 0.08765 | -118.00410 | 13.5267 | 11.6366 |
| -2.15911 | -118.09129 | 0.08764 | -118.00365 | 13.8185 | 11.9228 |
| -2.13911 | -118.09082 | 0.08763 | -118.00319 | 14.1110 | 12.2096 |
| -2.11911 | -118.09036 | 0.08762 | -118.00273 | 14.4041 | 12.4971 |
| -2.09911 | -118.08989 | 0.08761 | -118.00227 | 14.6978 | 12.7845 |
| -2.07911 | -118.08942 | 0.08761 | -118.00181 | 14.9919 | 13.0730 |
| -2.05911 | -118.08895 | 0.08760 | -118.00135 | 15.2872 | 13.3632 |
| -2.03911 | -118.08848 | 0.08759 | -118.00089 | 15.5828 | 13.6526 |
| -2.01911 | -118.08801 | 0.08758 | -118.00043 | 15.8787 | 13.9428 |
| -1.99911 | -118.08753 | 0.08757 | -117.99996 | 16.1749 | 14.2334 |
| -1.97911 | -118.08706 | 0.08756 | -117.99950 | 16.4720 | 14.5254 |
| -1.95911 | -118.08659 | 0.08755 | -117.99904 | 16.7685 | 14.8164 |
| -1.93911 | -118.08611 | 0.08754 | -117.99857 | 17.0655 | 15.1077 |
| -1.91911 | -118.08564 | 0.08753 | -117.99811 | 17.3628 | 15.3993 |
| -1.89911 | -118.08517 | 0.08753 | -117.99764 | 17.6599 | 15.6914 |
| -1.87911 | -118.08469 | 0.08752 | -117.99718 | 17.9574 | 15.9832 |
| -1.85911 | -118.08422 | 0.08751 | -117.99671 | 18.2541 | 16.2744 |
| -1.83911 | -118.08375 | 0.08750 | -117.99625 | 18.5511 | 16.5656 |
| -1.81911 | -118.08328 | 0.08749 | -117.99579 | 18.8471 | 16.8560 |
| -1.79911 | -118.08280 | 0.08748 | -117.99532 | 19.1434 | 17.1473 |
| -1.77911 | -118.08233 | 0.08747 | -117.99486 | 19.4392 | 17.4375 |
| -1.75911 | -118.08186 | 0.08746 | -117.99440 | 19.7345 | 17.7271 |
| -1.73911 | -118.08139 | 0.08746 | -117.99394 | 20.0295 | 18.0165 |
| -1.71911 | -118.08092 | 0.08745 | -117.99348 | 20.3235 | 18.3048 |
| -1.69911 | -118.08046 | 0.08744 | -117.99302 | 20.6165 | 18.5922 |
| -1.67911 | -118.07999 | 0.08743 | -117.99256 | 20.9091 | 18.8791 |
| -1.65911 | -118.07953 | 0.08742 | -117.99211 | 21.2003 | 19.1647 |
| -1.63911 | -118.07906 | 0.08741 | -117.99165 | 21.4911 | 19.4499 |
| -1.61911 | -118.07860 | 0.08740 | -117.99120 | 21.7800 | 19.7330 |
| -1.59911 | -118.07814 | 0.08739 | -117.99075 | 22.0687 | 20.0161 |
| -1.57911 | -118.07768 | 0.08738 | -117.99030 | 22.3556 | 20.2974 |



|          |            |         |            |         |         |
|----------|------------|---------|------------|---------|---------|
| -1.55911 | -118.07723 | 0.08737 | -117.98985 | 22.6414 | 20.5775 |
| -1.53911 | -118.07678 | 0.08736 | -117.98941 | 22.9258 | 20.8557 |
| -1.51911 | -118.07633 | 0.08736 | -117.98897 | 23.2079 | 21.1321 |
| -1.49911 | -118.07588 | 0.08735 | -117.98853 | 23.4890 | 21.4075 |
| -1.47911 | -118.07543 | 0.08734 | -117.98810 | 23.7685 | 21.6808 |
| -1.45911 | -118.07499 | 0.08733 | -117.98766 | 24.0458 | 21.9518 |
| -1.43911 | -118.07455 | 0.08732 | -117.98723 | 24.3212 | 22.2216 |
| -1.41911 | -118.07412 | 0.08731 | -117.98681 | 24.5949 | 22.4889 |
| -1.39911 | -118.07368 | 0.08730 | -117.98639 | 24.8663 | 22.7541 |
| -1.37911 | -118.07325 | 0.08729 | -117.98597 | 25.1354 | 23.0163 |
| -1.35911 | -118.07283 | 0.08728 | -117.98555 | 25.4027 | 23.2774 |
| -1.33911 | -118.07241 | 0.08727 | -117.98514 | 25.6670 | 23.5353 |
| -1.31911 | -118.07199 | 0.08726 | -117.98474 | 25.9286 | 23.7901 |
| -1.29911 | -118.07158 | 0.08725 | -117.98433 | 26.1878 | 24.0430 |
| -1.27911 | -118.07117 | 0.08723 | -117.98393 | 26.4441 | 24.2923 |
| -1.25911 | -118.07076 | 0.08722 | -117.98354 | 26.6976 | 24.5389 |
| -1.23911 | -118.07037 | 0.08721 | -117.98315 | 26.9479 | 24.7823 |
| -1.21911 | -118.06997 | 0.08720 | -117.98277 | 27.1954 | 25.0230 |
| -1.19911 | -118.06958 | 0.08719 | -117.98239 | 27.4397 | 25.2597 |
| -1.17911 | -118.06920 | 0.08718 | -117.98202 | 27.6810 | 25.4941 |
| -1.15911 | -118.06882 | 0.08717 | -117.98165 | 27.9186 | 25.7242 |
| -1.13911 | -118.06845 | 0.08715 | -117.98129 | 28.1525 | 25.9506 |
| -1.11911 | -118.06808 | 0.08714 | -117.98094 | 28.3833 | 26.1738 |
| -1.09911 | -118.06772 | 0.08713 | -117.98059 | 28.6100 | 26.3930 |
| -1.07911 | -118.06736 | 0.08712 | -117.98024 | 28.8331 | 26.6086 |
| -1.05911 | -118.06701 | 0.08711 | -117.97991 | 29.0523 | 26.8202 |
| -1.03911 | -118.06667 | 0.08709 | -117.97958 | 29.2682 | 27.0279 |
| -1.01911 | -118.06633 | 0.08708 | -117.97925 | 29.4792 | 27.2309 |
| -0.99911 | -118.06600 | 0.08707 | -117.97893 | 29.6865 | 27.4300 |
| -0.97911 | -118.06568 | 0.08706 | -117.97862 | 29.8892 | 27.6252 |
| -0.95911 | -118.06536 | 0.08704 | -117.97832 | 30.0883 | 27.8155 |
| -0.93911 | -118.06505 | 0.08703 | -117.97802 | 30.2828 | 28.0018 |
| -0.91911 | -118.06475 | 0.08702 | -117.97773 | 30.4726 | 28.1835 |
| -0.89911 | -118.06445 | 0.08700 | -117.97745 | 30.6582 | 28.3609 |
| -0.87911 | -118.06416 | 0.08699 | -117.97718 | 30.8392 | 28.5331 |
| -0.85911 | -118.06388 | 0.08697 | -117.97691 | 31.0157 | 28.7008 |
| -0.83911 | -118.06361 | 0.08696 | -117.97665 | 31.1878 | 28.8648 |
| -0.81911 | -118.06334 | 0.08695 | -117.97640 | 31.3550 | 29.0232 |
| -0.79911 | -118.06308 | 0.08693 | -117.97615 | 31.5173 | 29.1767 |
| -0.77911 | -118.06283 | 0.08692 | -117.97591 | 31.6754 | 29.3260 |
| -0.75911 | -118.06259 | 0.08691 | -117.97568 | 31.8285 | 29.4703 |
| -0.73911 | -118.06235 | 0.08689 | -117.97546 | 31.9769 | 29.6100 |
| -0.71911 | -118.06212 | 0.08688 | -117.97525 | 32.1205 | 29.7448 |
| -0.69911 | -118.06190 | 0.08686 | -117.97504 | 32.2595 | 29.8743 |
| -0.67911 | -118.06169 | 0.08685 | -117.97484 | 32.3931 | 29.9991 |
| -0.65911 | -118.06148 | 0.08683 | -117.97465 | 32.5226 | 30.1198 |

|          |            |         |            |         |         |
|----------|------------|---------|------------|---------|---------|
| -0.63911 | -118.06128 | 0.08682 | -117.97446 | 32.6471 | 30.2356 |
| -0.61911 | -118.06109 | 0.08681 | -117.97429 | 32.7667 | 30.3458 |
| -0.59911 | -118.06091 | 0.08679 | -117.97412 | 32.8815 | 30.4518 |
| -0.57911 | -118.06073 | 0.08678 | -117.97396 | 32.9919 | 30.5534 |
| -0.55911 | -118.06057 | 0.08676 | -117.97380 | 33.0971 | 30.6492 |
| -0.53911 | -118.06041 | 0.08675 | -117.97366 | 33.1981 | 30.7414 |
| -0.51911 | -118.06025 | 0.08673 | -117.97352 | 33.2948 | 30.8293 |
| -0.49911 | -118.06011 | 0.08672 | -117.97339 | 33.3863 | 30.9114 |
| -0.47911 | -118.05997 | 0.08671 | -117.97326 | 33.4728 | 30.9897 |
| -0.45911 | -118.05984 | 0.08669 | -117.97314 | 33.5558 | 31.0633 |
| -0.43911 | -118.05971 | 0.08668 | -117.97303 | 33.6336 | 31.1323 |
| -0.41911 | -118.05959 | 0.08666 | -117.97293 | 33.7079 | 31.1978 |
| -0.39911 | -118.05948 | 0.08665 | -117.97283 | 33.7769 | 31.2581 |
| -0.37911 | -118.05938 | 0.08663 | -117.97274 | 33.8434 | 31.3151 |
| -0.35911 | -118.05928 | 0.08662 | -117.97266 | 33.9041 | 31.3677 |
| -0.33911 | -118.05919 | 0.08661 | -117.97258 | 33.9616 | 31.4164 |
| -0.31911 | -118.05910 | 0.08659 | -117.97251 | 34.0145 | 31.4606 |
| -0.29911 | -118.05902 | 0.08658 | -117.97245 | 34.0654 | 31.5001 |
| -0.27911 | -118.05895 | 0.08657 | -117.97239 | 34.1093 | 31.5378 |
| -0.25912 | -118.05889 | 0.08655 | -117.97234 | 34.1520 | 31.5704 |
| -0.23912 | -118.05883 | 0.08654 | -117.97229 | 34.1891 | 31.6000 |
| -0.21912 | -118.05877 | 0.08652 | -117.97225 | 34.2243 | 31.6257 |
| -0.19912 | -118.05872 | 0.08651 | -117.97222 | 34.2531 | 31.6458 |
| -0.17913 | -118.05868 | 0.08650 | -117.97218 | 34.2825 | 31.6677 |
| -0.15913 | -118.05864 | 0.08648 | -117.97216 | 34.3063 | 31.6827 |
| -0.13913 | -118.05860 | 0.08647 | -117.97214 | 34.3287 | 31.6944 |
| -0.11914 | -118.05858 | 0.08645 | -117.97213 | 34.3445 | 31.7002 |
| -0.09917 | -118.05855 | 0.08641 | -117.97214 | 34.3632 | 31.7048 |
| -0.07926 | -118.05854 | 0.08636 | -117.97218 | 34.3699 | 31.7055 |
| -0.05948 | -118.05851 | 0.08622 | -117.97229 | 34.3862 | 31.7086 |
| -0.03985 | -118.05851 | 0.08640 | -117.97211 | 34.3876 | 31.7106 |
| -0.01986 | -118.05850 | 0.08639 | -117.97212 | 34.3919 | 31.7131 |
| 0        | -118.05850 | 0.08449 | -117.97401 | 34.3800 | 31.6772 |
| 0.01984  | -118.05852 | 0.08632 | -117.97220 | 34.3706 | 31.6391 |
| 0.03984  | -118.05854 | 0.08631 | -117.97223 | 34.3652 | 31.5480 |
| 0.05934  | -118.05855 | 0.08603 | -117.97252 | 34.3450 | 31.5337 |
| 0.07904  | -118.05858 | 0.08618 | -117.97239 | 34.3356 | 31.5432 |
| 0.0989   | -118.05859 | 0.08621 | -117.97238 | 34.3148 | 31.5418 |
| 0.11885  | -118.05863 | 0.08624 | -117.97238 | 34.2987 | 31.5201 |
| 0.13883  | -118.05865 | 0.08624 | -117.97242 | 34.2768 | 31.4944 |
| 0.15882  | -118.05869 | 0.08623 | -117.97246 | 34.2556 | 31.4645 |
| 0.17882  | -118.05872 | 0.08622 | -117.97251 | 34.2288 | 31.4151 |
| 0.19877  | -118.05876 | 0.08618 | -117.97258 | 34.2077 | 31.3933 |
| 0.21874  | -118.05880 | 0.08618 | -117.97262 | 34.1797 | 31.3622 |
| 0.23874  | -118.05884 | 0.08617 | -117.97267 | 34.1519 | 31.3250 |
| 0.25874  | -118.05889 | 0.08616 | -117.97273 | 34.1207 | 31.2819 |

|         |            |         |            |         |         |
|---------|------------|---------|------------|---------|---------|
| 0.27872 | -118.05894 | 0.08614 | -117.97280 | 34.0923 | 31.2453 |
| 0.29871 | -118.05898 | 0.08613 | -117.97285 | 34.0599 | 31.2054 |
| 0.31871 | -118.05903 | 0.08611 | -117.97292 | 34.0281 | 31.1573 |
| 0.3387  | -118.05908 | 0.08609 | -117.97299 | 33.9922 | 31.1189 |
| 0.35869 | -118.05914 | 0.08608 | -117.97306 | 33.9577 | 31.0749 |
| 0.37869 | -118.05919 | 0.08607 | -117.97313 | 33.9200 | 31.0265 |
| 0.39868 | -118.05926 | 0.08605 | -117.97320 | 33.8842 | 30.9819 |
| 0.41868 | -118.05931 | 0.08604 | -117.97327 | 33.8461 | 30.9344 |
| 0.43868 | -118.05937 | 0.08602 | -117.97335 | 33.8071 | 30.8848 |
| 0.45868 | -118.05943 | 0.08601 | -117.97343 | 33.7672 | 30.8361 |
| 0.47868 | -118.05950 | 0.08599 | -117.97351 | 33.7270 | 30.7827 |
| 0.49867 | -118.05956 | 0.08597 | -117.97359 | 33.6854 | 30.7348 |
| 0.51867 | -118.05963 | 0.08596 | -117.97367 | 33.6437 | 30.6832 |
| 0.53867 | -118.05970 | 0.08595 | -117.97375 | 33.6011 | 30.6298 |
| 0.55867 | -118.05976 | 0.08593 | -117.97384 | 33.5581 | 30.5774 |
| 0.57867 | -118.05983 | 0.08591 | -117.97392 | 33.5137 | 30.5224 |
| 0.59866 | -118.05990 | 0.08590 | -117.97401 | 33.4698 | 30.4684 |
| 0.61866 | -118.05997 | 0.08588 | -117.97409 | 33.4252 | 30.4144 |
| 0.63866 | -118.06004 | 0.08587 | -117.97418 | 33.3797 | 30.3583 |
| 0.65866 | -118.06012 | 0.08585 | -117.97427 | 33.3343 | 30.3015 |
| 0.67866 | -118.06019 | 0.08583 | -117.97436 | 33.2883 | 30.2461 |
| 0.69866 | -118.06026 | 0.08582 | -117.97445 | 33.2422 | 30.1893 |
| 0.71866 | -118.06034 | 0.08580 | -117.97454 | 33.1950 | 30.1321 |
| 0.73866 | -118.06041 | 0.08578 | -117.97463 | 33.1481 | 30.0739 |
| 0.75866 | -118.06049 | 0.08576 | -117.97472 | 33.1008 | 30.0172 |
| 0.77866 | -118.06056 | 0.08575 | -117.97481 | 33.0530 | 29.9575 |
| 0.79865 | -118.06064 | 0.08573 | -117.97491 | 33.0057 | 29.9001 |
| 0.81865 | -118.06071 | 0.08571 | -117.97500 | 32.9574 | 29.8418 |
| 0.83865 | -118.06079 | 0.08570 | -117.97509 | 32.9093 | 29.7830 |
| 0.85865 | -118.06087 | 0.08568 | -117.97518 | 32.8609 | 29.7233 |
| 0.87865 | -118.06094 | 0.08566 | -117.97528 | 32.8124 | 29.6648 |
| 0.89865 | -118.06102 | 0.08565 | -117.97537 | 32.7635 | 29.6040 |
| 0.91865 | -118.06110 | 0.08563 | -117.97547 | 32.7149 | 29.5460 |
| 0.93865 | -118.06118 | 0.08561 | -117.97556 | 32.6662 | 29.4847 |
| 0.95864 | -118.06125 | 0.08559 | -117.97566 | 32.6173 | 29.4270 |
| 0.97864 | -118.06133 | 0.08558 | -117.97575 | 32.5684 | 29.3668 |
| 0.99864 | -118.06141 | 0.08556 | -117.97585 | 32.5194 | 29.3071 |
| 1.01864 | -118.06149 | 0.08554 | -117.97594 | 32.4706 | 29.2471 |
| 1.03864 | -118.06156 | 0.08553 | -117.97604 | 32.4216 | 29.1880 |
| 1.05864 | -118.06164 | 0.08551 | -117.97613 | 32.3723 | 29.1275 |
| 1.07864 | -118.06172 | 0.08549 | -117.97623 | 32.3237 | 29.0682 |
| 1.09864 | -118.06180 | 0.08548 | -117.97632 | 32.2743 | 29.0075 |
| 1.11864 | -118.06188 | 0.08546 | -117.97642 | 32.2258 | 28.9495 |
| 1.13863 | -118.06195 | 0.08544 | -117.97651 | 32.1771 | 28.8902 |
| 1.15863 | -118.06203 | 0.08543 | -117.97661 | 32.1283 | 28.8308 |
| 1.17863 | -118.06211 | 0.08541 | -117.97670 | 32.0796 | 28.7707 |

|         |            |         |            |         |         |
|---------|------------|---------|------------|---------|---------|
| 1.19863 | -118.06219 | 0.08539 | -117.97680 | 32.0314 | 28.7125 |
| 1.21863 | -118.06226 | 0.08537 | -117.97689 | 31.9827 | 28.6525 |
| 1.23863 | -118.06234 | 0.08536 | -117.97699 | 31.9347 | 28.5945 |
| 1.25863 | -118.06242 | 0.08534 | -117.97708 | 31.8867 | 28.5352 |
| 1.27863 | -118.06250 | 0.08532 | -117.97717 | 31.8382 | 28.4773 |
| 1.29863 | -118.06257 | 0.08531 | -117.97727 | 31.7911 | 28.4194 |
| 1.31863 | -118.06265 | 0.08529 | -117.97736 | 31.7430 | 28.3607 |
| 1.33863 | -118.06272 | 0.08527 | -117.97745 | 31.6957 | 28.3028 |
| 1.35863 | -118.06280 | 0.08526 | -117.97754 | 31.6485 | 28.2455 |
| 1.37863 | -118.06287 | 0.08524 | -117.97763 | 31.6010 | 28.1874 |
| 1.39862 | -118.06295 | 0.08522 | -117.97773 | 31.5544 | 28.1307 |
| 1.41862 | -118.06302 | 0.08521 | -117.97782 | 31.5075 | 28.0726 |
| 1.43862 | -118.06310 | 0.08519 | -117.97791 | 31.4610 | 28.0172 |
| 1.45862 | -118.06317 | 0.08518 | -117.97800 | 31.4145 | 27.9607 |
| 1.47862 | -118.06325 | 0.08516 | -117.97809 | 31.3684 | 27.9040 |
| 1.49862 | -118.06332 | 0.08514 | -117.97818 | 31.3225 | 27.8474 |
| 1.51862 | -118.06339 | 0.08513 | -117.97827 | 31.2771 | 27.7925 |
| 1.53862 | -118.06347 | 0.08511 | -117.97836 | 31.2318 | 27.7359 |
| 1.55861 | -118.06354 | 0.08509 | -117.97845 | 31.1864 | 27.6824 |
| 1.57861 | -118.06361 | 0.08508 | -117.97853 | 31.1415 | 27.6275 |
| 1.59861 | -118.06368 | 0.08506 | -117.97862 | 31.0970 | 27.5735 |
| 1.61861 | -118.06375 | 0.08505 | -117.97871 | 31.0526 | 27.5178 |
| 1.63861 | -118.06382 | 0.08503 | -117.97879 | 31.0083 | 27.4653 |
| 1.65861 | -118.06390 | 0.08502 | -117.97888 | 30.9645 | 27.4102 |
| 1.67861 | -118.06396 | 0.08500 | -117.97897 | 30.9207 | 27.3577 |
| 1.69861 | -118.06403 | 0.08499 | -117.97905 | 30.8775 | 27.3057 |
| 1.71861 | -118.06410 | 0.08497 | -117.97913 | 30.8340 | 27.2522 |
| 1.73861 | -118.06417 | 0.08496 | -117.97922 | 30.7911 | 27.1986 |
| 1.7586  | -118.06424 | 0.08494 | -117.97930 | 30.7487 | 27.1481 |
| 1.7786  | -118.06431 | 0.08493 | -117.97938 | 30.7065 | 27.0964 |
| 1.7986  | -118.06438 | 0.08491 | -117.97947 | 30.6643 | 27.0455 |
| 1.8186  | -118.06444 | 0.08490 | -117.97955 | 30.6227 | 26.9932 |
| 1.8386  | -118.06451 | 0.08488 | -117.97963 | 30.5812 | 26.9435 |
| 1.8586  | -118.06458 | 0.08487 | -117.97971 | 30.5397 | 26.8932 |
| 1.8786  | -118.06464 | 0.08485 | -117.97979 | 30.4990 | 26.8432 |
| 1.8986  | -118.06471 | 0.08484 | -117.97987 | 30.4584 | 26.7925 |
| 1.91859 | -118.06477 | 0.08482 | -117.97995 | 30.4180 | 26.7446 |
| 1.93859 | -118.06484 | 0.08481 | -117.98003 | 30.3780 | 26.6952 |
| 1.95859 | -118.06490 | 0.08479 | -117.98011 | 30.3383 | 26.6473 |
| 1.97859 | -118.06496 | 0.08478 | -117.98018 | 30.2988 | 26.5972 |
| 1.99859 | -118.06503 | 0.08476 | -117.98026 | 30.2597 | 26.5511 |
| 2.01858 | -118.06509 | 0.08475 | -117.98034 | 30.2207 | 26.5033 |
| 2.03858 | -118.06515 | 0.08474 | -117.98041 | 30.1826 | 26.4565 |
| 2.05858 | -118.06521 | 0.08473 | -117.98049 | 30.1443 | 26.4100 |
| 2.07858 | -118.06527 | 0.08471 | -117.98056 | 30.1060 | 26.3623 |
| 2.09858 | -118.06533 | 0.08470 | -117.98064 | 30.0685 | 26.3172 |

|         |            |         |            |         |         |
|---------|------------|---------|------------|---------|---------|
| 2.11858 | -118.06539 | 0.08469 | -117.98071 | 30.0312 | 26.2712 |
| 2.13858 | -118.06545 | 0.08467 | -117.98078 | 29.9939 | 26.2257 |
| 2.15858 | -118.06551 | 0.08466 | -117.98085 | 29.9576 | 26.1813 |
| 2.17858 | -118.06557 | 0.08465 | -117.98092 | 29.9210 | 26.1352 |
| 2.19857 | -118.06563 | 0.08463 | -117.98100 | 29.8848 | 26.0921 |
| 2.21857 | -118.06569 | 0.08462 | -117.98107 | 29.8491 | 26.0482 |
| 2.23857 | -118.06574 | 0.08461 | -117.98114 | 29.8136 | 26.0040 |
| 2.25857 | -118.06580 | 0.08459 | -117.98121 | 29.7779 | 25.9614 |
| 2.27857 | -118.06586 | 0.08458 | -117.98127 | 29.7432 | 25.9166 |
| 2.29856 | -118.06591 | 0.08457 | -117.98135 | 29.7087 | 25.8759 |
| 2.31856 | -118.06597 | 0.08456 | -117.98141 | 29.6743 | 25.8340 |
| 2.33856 | -118.06602 | 0.08454 | -117.98148 | 29.6401 | 25.7916 |
| 2.35856 | -118.06608 | 0.08453 | -117.98155 | 29.6063 | 25.7503 |
| 2.37856 | -118.06613 | 0.08452 | -117.98161 | 29.5728 | 25.7049 |
| 2.39855 | -118.06618 | 0.08450 | -117.98168 | 29.5397 | 25.6673 |
| 2.41854 | -118.06624 | 0.08449 | -117.98174 | 29.5069 | 25.6276 |
| 2.43854 | -118.06629 | 0.08448 | -117.98181 | 29.4743 | 25.5863 |
| 2.45854 | -118.06634 | 0.08447 | -117.98187 | 29.4422 | 25.5479 |
| 2.47853 | -118.06639 | 0.08446 | -117.98193 | 29.4100 | 25.5088 |
| 2.49853 | -118.06644 | 0.08445 | -117.98200 | 29.3785 | 25.4685 |
| 2.51853 | -118.06649 | 0.08443 | -117.98206 | 29.3471 | 25.4308 |
| 2.53853 | -118.06654 | 0.08442 | -117.98212 | 29.3163 | 25.3931 |
| 2.55853 | -118.06659 | 0.08441 | -117.98218 | 29.2853 | 25.3539 |
| 2.57853 | -118.06664 | 0.08440 | -117.98224 | 29.2548 | 25.3172 |
| 2.59852 | -118.06669 | 0.08439 | -117.98230 | 29.2244 | 25.2799 |
| 2.61852 | -118.06674 | 0.08438 | -117.98236 | 29.1945 | 25.2418 |
| 2.63852 | -118.06679 | 0.08436 | -117.98242 | 29.1647 | 25.2058 |
| 2.65852 | -118.06683 | 0.08435 | -117.98248 | 29.1356 | 25.1698 |
| 2.67852 | -118.06688 | 0.08434 | -117.98254 | 29.1064 | 25.1337 |
| 2.69852 | -118.06693 | 0.08433 | -117.98259 | 29.0779 | 25.0983 |
| 2.71852 | -118.06697 | 0.08432 | -117.98265 | 29.0494 | 25.0635 |
| 2.73852 | -118.06702 | 0.08431 | -117.98271 | 29.0211 | 25.0276 |
| 2.75852 | -118.06706 | 0.08430 | -117.98276 | 28.9931 | 24.9939 |
| 2.77851 | -118.06711 | 0.08429 | -117.98282 | 28.9655 | 24.9595 |
| 2.79851 | -118.06715 | 0.08428 | -117.98287 | 28.9383 | 24.9248 |
| 2.81851 | -118.06719 | 0.08427 | -117.98293 | 28.9111 | 24.8919 |
| 2.83851 | -118.06724 | 0.08426 | -117.98298 | 28.8840 | 24.8585 |
| 2.85851 | -118.06728 | 0.08425 | -117.98303 | 28.8579 | 24.8243 |
| 2.8785  | -118.06732 | 0.08424 | -117.98309 | 28.8314 | 24.7934 |
| 2.8985  | -118.06736 | 0.08423 | -117.98314 | 28.8052 | 24.7610 |
| 2.9185  | -118.06741 | 0.08422 | -117.98319 | 28.7795 | 24.7264 |
| 2.93849 | -118.06745 | 0.08420 | -117.98324 | 28.7541 | 24.6966 |
| 2.95849 | -118.06749 | 0.08420 | -117.98329 | 28.7290 | 24.6658 |
| 2.97849 | -118.06753 | 0.08419 | -117.98334 | 28.7040 | 24.6296 |
| 2.99847 | -118.06757 | 0.08417 | -117.98340 | 28.6794 | 24.6031 |
| 3.01846 | -118.06761 | 0.08417 | -117.98344 | 28.6550 | 24.5731 |

|         |            |         |            |         |         |
|---------|------------|---------|------------|---------|---------|
| 3.03846 | -118.06765 | 0.08416 | -117.98349 | 28.6309 | 24.5433 |
| 3.05846 | -118.06768 | 0.08415 | -117.98353 | 28.6070 | 24.5119 |
| 3.07846 | -118.06772 | 0.08414 | -117.98358 | 28.5830 | 24.4829 |
| 3.09845 | -118.06776 | 0.08413 | -117.98363 | 28.5598 | 24.4546 |
| 3.11845 | -118.06780 | 0.08412 | -117.98368 | 28.5368 | 24.4184 |
| 3.13843 | -118.06783 | 0.08410 | -117.98373 | 28.5138 | 24.3954 |
| 3.15842 | -118.06787 | 0.08410 | -117.98377 | 28.4912 | 24.3679 |
| 3.17842 | -118.06791 | 0.08409 | -117.98381 | 28.4686 | 24.3396 |
| 3.19842 | -118.06794 | 0.08408 | -117.98386 | 28.4465 | 24.3081 |
| 3.21841 | -118.06798 | 0.08407 | -117.98391 | 28.4245 | 24.2842 |
| 3.2384  | -118.06801 | 0.08407 | -117.98395 | 28.4029 | 24.2576 |
| 3.2584  | -118.06805 | 0.08406 | -117.98399 | 28.3815 | 24.2305 |
| 3.2784  | -118.06808 | 0.08405 | -117.98403 | 28.3599 | 24.1989 |
| 3.29838 | -118.06812 | 0.08403 | -117.98408 | 28.3393 | 24.1758 |
| 3.31838 | -118.06815 | 0.08403 | -117.98412 | 28.3184 | 24.1511 |
| 3.33838 | -118.06818 | 0.08402 | -117.98416 | 28.2978 | 24.1242 |
| 3.35838 | -118.06821 | 0.08401 | -117.98420 | 28.2774 | 24.0944 |
| 3.37836 | -118.06825 | 0.08400 | -117.98425 | 28.2577 | 24.0716 |
| 3.39835 | -118.06828 | 0.08399 | -117.98429 | 28.2378 | 24.0479 |
| 3.41835 | -118.06831 | 0.08399 | -117.98432 | 28.2181 | 24.0226 |
| 3.43835 | -118.06834 | 0.08398 | -117.98436 | 28.1983 | 23.9928 |
| 3.45833 | -118.06837 | 0.08396 | -117.98441 | 28.1795 | 23.9714 |
| 3.47832 | -118.06840 | 0.08396 | -117.98445 | 28.1602 | 23.9490 |
| 3.49832 | -118.06843 | 0.08395 | -117.98448 | 28.1416 | 23.9241 |
| 3.51832 | -118.06846 | 0.08394 | -117.98452 | 28.1227 | 23.8889 |
| 3.53828 | -118.06849 | 0.08392 | -117.98458 | 28.1047 | 23.8740 |
| 3.55826 | -118.06852 | 0.08392 | -117.98460 | 28.0864 | 23.8532 |
| 3.57825 | -118.06855 | 0.08392 | -117.98463 | 28.0686 | 23.8304 |
| 3.59825 | -118.06858 | 0.08391 | -117.98467 | 28.0509 | 23.8070 |
| 3.61825 | -118.06861 | 0.08390 | -117.98471 | 28.0333 | 23.7763 |
| 3.63822 | -118.06864 | 0.08388 | -117.98476 | 28.0159 | 23.7595 |
| 3.65821 | -118.06866 | 0.08388 | -117.98478 | 27.9989 | 23.7394 |
| 3.6782  | -118.06869 | 0.08388 | -117.98482 | 27.9815 | 23.7176 |
| 3.6982  | -118.06872 | 0.08387 | -117.98485 | 27.9648 | 23.6953 |
| 3.7182  | -118.06875 | 0.08386 | -117.98489 | 27.9484 | 23.6644 |
| 3.73818 | -118.06877 | 0.08384 | -117.98494 | 27.9321 | 23.6494 |
| 3.75816 | -118.06880 | 0.08384 | -117.98496 | 27.9160 | 23.6307 |
| 3.77815 | -118.06882 | 0.08383 | -117.98499 | 27.8997 | 23.6094 |
| 3.79815 | -118.06885 | 0.08383 | -117.98502 | 27.8840 | 23.5881 |
| 3.81815 | -118.06887 | 0.08382 | -117.98506 | 27.8683 | 23.5548 |
| 3.83811 | -118.06890 | 0.08379 | -117.98511 | 27.8527 | 23.5423 |
| 3.85809 | -118.06892 | 0.08379 | -117.98513 | 27.8374 | 23.5258 |
| 3.87808 | -118.06895 | 0.08379 | -117.98516 | 27.8225 | 23.5058 |

**SI Table 35:** Potential energy data along the MEP for reaction  $C\cdot CCC \rightarrow CC\cdot + C=C$ . All data calculated with GAUSSIAN 03 program at the CCSD(T)/cc-pVDZ//BH&HLYP/cc-pVDZ level of theory.

| <b>Reaction <math>C\cdot CCC \rightarrow C\cdot C + C=C</math></b> |                 |               |                    |                              |                                 |
|--------------------------------------------------------------------|-----------------|---------------|--------------------|------------------------------|---------------------------------|
| $E_{C.CCC} = -157.311776$ hartree $ZPE_{C.CCC} = 0.120044$ hartree |                 |               |                    |                              |                                 |
| Reaction coordinate<br>(amu <sup>1/2</sup> bohr)                   | $V_c$ (Hartree) | ZPE (Hartree) | $V_{ag}$ (Hartree) | $V_c - E_{C.CCC}$ (kcal/mol) | $V_{ag} - E_{C.CCC}$ (kcal/mol) |
| -3.080                                                             | -157.30757      | 0.11762       | -157.18994         | 2.64                         | 1.12                            |
| -3.060                                                             | -157.30735      | 0.11760       | -157.18974         | 2.78                         | 1.25                            |
| -3.059                                                             | -157.30748      | 0.11762       | -157.18987         | 2.70                         | 1.17                            |
| -3.040                                                             | -157.30712      | 0.11758       | -157.18954         | 2.92                         | 1.38                            |
| -3.029                                                             | -157.30714      | 0.11758       | -157.18956         | 2.91                         | 1.36                            |
| -3.020                                                             | -157.30688      | 0.11756       | -157.18932         | 3.07                         | 1.51                            |
| -3.000                                                             | -157.30664      | 0.11754       | -157.18910         | 3.22                         | 1.65                            |
| -2.999                                                             | -157.30679      | 0.11755       | -157.18924         | 3.13                         | 1.56                            |
| -2.980                                                             | -157.30640      | 0.11752       | -157.18887         | 3.38                         | 1.79                            |
| -2.969                                                             | -157.30642      | 0.11752       | -157.18890         | 3.36                         | 1.78                            |
| -2.960                                                             | -157.30614      | 0.11750       | -157.18864         | 3.54                         | 1.94                            |
| -2.940                                                             | -157.30588      | 0.11749       | -157.18839         | 3.70                         | 2.09                            |
| -2.939                                                             | -157.30604      | 0.11750       | -157.18854         | 3.60                         | 2.00                            |
| -2.920                                                             | -157.30561      | 0.11747       | -157.18814         | 3.87                         | 2.25                            |
| -2.909                                                             | -157.30564      | 0.11747       | -157.18817         | 3.85                         | 2.24                            |
| -2.900                                                             | -157.30534      | 0.11745       | -157.18788         | 4.04                         | 2.41                            |
| -2.880                                                             | -157.30505      | 0.11744       | -157.18762         | 4.22                         | 2.58                            |
| -2.879                                                             | -157.30523      | 0.11745       | -157.18778         | 4.11                         | 2.48                            |
| -2.860                                                             | -157.30477      | 0.11742       | -157.18735         | 4.40                         | 2.75                            |
| -2.849                                                             | -157.30480      | 0.11742       | -157.18738         | 4.38                         | 2.73                            |
| -2.840                                                             | -157.30448      | 0.11741       | -157.18707         | 4.58                         | 2.93                            |
| -2.820                                                             | -157.30418      | 0.11739       | -157.18679         | 4.77                         | 3.10                            |
| -2.819                                                             | -157.30436      | 0.11740       | -157.18696         | 4.66                         | 3.00                            |
| -2.800                                                             | -157.30387      | 0.11738       | -157.18649         | 4.96                         | 3.29                            |
| -2.789                                                             | -157.30390      | 0.11738       | -157.18652         | 4.94                         | 3.27                            |
| -2.780                                                             | -157.30356      | 0.11736       | -157.18620         | 5.16                         | 3.47                            |
| -2.760                                                             | -157.30324      | 0.11735       | -157.18589         | 5.35                         | 3.66                            |
| -2.759                                                             | -157.30343      | 0.11736       | -157.18608         | 5.23                         | 3.55                            |
| -2.740                                                             | -157.30292      | 0.11734       | -157.18559         | 5.56                         | 3.86                            |

|        |            |         |            |       |       |
|--------|------------|---------|------------|-------|-------|
| -2.729 | -157.30295 | 0.11734 | -157.18562 | 5.54  | 3.84  |
| -2.720 | -157.30259 | 0.11732 | -157.18527 | 5.76  | 4.06  |
| -2.700 | -157.30226 | 0.11731 | -157.18495 | 5.97  | 4.26  |
| -2.699 | -157.30246 | 0.11732 | -157.18514 | 5.85  | 4.13  |
| -2.680 | -157.30192 | 0.11730 | -157.18462 | 6.18  | 4.46  |
| -2.669 | -157.30196 | 0.11730 | -157.18466 | 6.16  | 4.44  |
| -2.660 | -157.30158 | 0.11729 | -157.18429 | 6.40  | 4.67  |
| -2.640 | -157.30123 | 0.11728 | -157.18396 | 6.62  | 4.88  |
| -2.639 | -157.30144 | 0.11728 | -157.18416 | 6.48  | 4.75  |
| -2.620 | -157.30088 | 0.11727 | -157.18362 | 6.84  | 5.09  |
| -2.609 | -157.30092 | 0.11727 | -157.18365 | 6.82  | 5.07  |
| -2.600 | -157.30052 | 0.11725 | -157.18327 | 7.06  | 5.31  |
| -2.580 | -157.30016 | 0.11724 | -157.18292 | 7.29  | 5.53  |
| -2.579 | -157.30038 | 0.11725 | -157.18313 | 7.15  | 5.40  |
| -2.560 | -157.29980 | 0.11723 | -157.18256 | 7.52  | 5.75  |
| -2.549 | -157.29983 | 0.11723 | -157.18260 | 7.50  | 5.73  |
| -2.540 | -157.29942 | 0.11722 | -157.18220 | 7.75  | 5.98  |
| -2.520 | -157.29905 | 0.11721 | -157.18184 | 7.99  | 6.21  |
| -2.519 | -157.29928 | 0.11722 | -157.18206 | 7.84  | 6.07  |
| -2.500 | -157.29867 | 0.11720 | -157.18147 | 8.22  | 6.44  |
| -2.489 | -157.29871 | 0.11720 | -157.18151 | 8.20  | 6.42  |
| -2.480 | -157.29829 | 0.11719 | -157.18110 | 8.46  | 6.67  |
| -2.460 | -157.29790 | 0.11718 | -157.18072 | 8.70  | 6.91  |
| -2.459 | -157.29814 | 0.11719 | -157.18095 | 8.56  | 6.77  |
| -2.440 | -157.29752 | 0.11717 | -157.18034 | 8.95  | 7.15  |
| -2.429 | -157.29755 | 0.11718 | -157.18038 | 8.92  | 7.12  |
| -2.420 | -157.29712 | 0.11716 | -157.17996 | 9.20  | 7.39  |
| -2.400 | -157.29672 | 0.11716 | -157.17957 | 9.44  | 7.63  |
| -2.399 | -157.29696 | 0.11716 | -157.17980 | 9.30  | 7.49  |
| -2.380 | -157.29633 | 0.11715 | -157.17918 | 9.70  | 7.88  |
| -2.369 | -157.29637 | 0.11715 | -157.17922 | 9.67  | 7.85  |
| -2.360 | -157.29592 | 0.11714 | -157.17878 | 9.95  | 8.12  |
| -2.340 | -157.29552 | 0.11713 | -157.17839 | 10.20 | 8.37  |
| -2.339 | -157.29576 | 0.11713 | -157.17863 | 10.05 | 8.22  |
| -2.320 | -157.29511 | 0.11712 | -157.17799 | 10.46 | 8.62  |
| -2.309 | -157.29515 | 0.11712 | -157.17803 | 10.43 | 8.60  |
| -2.300 | -157.29470 | 0.11711 | -157.17759 | 10.72 | 8.88  |
| -2.280 | -157.29428 | 0.11710 | -157.17718 | 10.98 | 9.13  |
| -2.279 | -157.29453 | 0.11711 | -157.17742 | 10.82 | 8.98  |
| -2.260 | -157.29387 | 0.11710 | -157.17677 | 11.24 | 9.39  |
| -2.249 | -157.29391 | 0.11710 | -157.17681 | 11.21 | 9.36  |
| -2.240 | -157.29345 | 0.11709 | -157.17636 | 11.50 | 9.65  |
| -2.220 | -157.29302 | 0.11708 | -157.17595 | 11.77 | 9.91  |
| -2.219 | -157.29328 | 0.11708 | -157.17619 | 11.61 | 9.75  |
| -2.200 | -157.29260 | 0.11707 | -157.17553 | 12.03 | 10.17 |
| -2.189 | -157.29264 | 0.11707 | -157.17557 | 12.01 | 10.14 |



|        |            |         |            |       |       |
|--------|------------|---------|------------|-------|-------|
| -2.180 | -157.29218 | 0.11706 | -157.17511 | 12.30 | 10.43 |
| -2.160 | -157.29175 | 0.11706 | -157.17469 | 12.57 | 10.69 |
| -2.159 | -157.29200 | 0.11706 | -157.17494 | 12.41 | 10.54 |
| -2.140 | -157.29132 | 0.11705 | -157.17427 | 12.84 | 10.96 |
| -2.129 | -157.29136 | 0.11705 | -157.17431 | 12.81 | 10.93 |
| -2.120 | -157.29089 | 0.11704 | -157.17385 | 13.11 | 11.22 |
| -2.100 | -157.29045 | 0.11703 | -157.17342 | 13.38 | 11.49 |
| -2.099 | -157.29071 | 0.11704 | -157.17367 | 13.22 | 11.33 |
| -2.080 | -157.29002 | 0.11703 | -157.17299 | 13.65 | 11.76 |
| -2.069 | -157.29006 | 0.11703 | -157.17303 | 13.63 | 11.73 |
| -2.060 | -157.28958 | 0.11702 | -157.17256 | 13.93 | 12.03 |
| -2.040 | -157.28914 | 0.11701 | -157.17213 | 14.20 | 12.30 |
| -2.039 | -157.28940 | 0.11702 | -157.17239 | 14.04 | 12.14 |
| -2.020 | -157.28870 | 0.11700 | -157.17170 | 14.48 | 12.57 |
| -2.009 | -157.28875 | 0.11700 | -157.17174 | 14.45 | 12.54 |
| -2.000 | -157.28826 | 0.11700 | -157.17127 | 14.75 | 12.84 |
| -1.980 | -157.28782 | 0.11699 | -157.17084 | 15.03 | 13.11 |
| -1.979 | -157.28809 | 0.11699 | -157.17110 | 14.86 | 12.95 |
| -1.960 | -157.28738 | 0.11698 | -157.17040 | 15.31 | 13.39 |
| -1.949 | -157.28742 | 0.11698 | -157.17044 | 15.28 | 13.36 |
| -1.940 | -157.28694 | 0.11697 | -157.16997 | 15.59 | 13.66 |
| -1.920 | -157.28650 | 0.11697 | -157.16953 | 15.86 | 13.93 |
| -1.919 | -157.28676 | 0.11697 | -157.16979 | 15.70 | 13.77 |
| -1.900 | -157.28605 | 0.11696 | -157.16909 | 16.14 | 14.21 |
| -1.889 | -157.28609 | 0.11696 | -157.16913 | 16.12 | 14.18 |
| -1.880 | -157.28561 | 0.11695 | -157.16866 | 16.42 | 14.48 |
| -1.860 | -157.28516 | 0.11695 | -157.16822 | 16.70 | 14.76 |
| -1.859 | -157.28543 | 0.11695 | -157.16848 | 16.53 | 14.59 |
| -1.840 | -157.28472 | 0.11694 | -157.16778 | 16.98 | 15.03 |
| -1.829 | -157.28476 | 0.11694 | -157.16782 | 16.95 | 15.00 |
| -1.820 | -157.28427 | 0.11693 | -157.16734 | 17.26 | 15.31 |
| -1.800 | -157.28383 | 0.11692 | -157.16690 | 17.54 | 15.58 |
| -1.799 | -157.28409 | 0.11693 | -157.16716 | 17.37 | 15.42 |
| -1.780 | -157.28338 | 0.11692 | -157.16646 | 17.82 | 15.86 |
| -1.769 | -157.28342 | 0.11692 | -157.16650 | 17.79 | 15.83 |
| -1.760 | -157.28294 | 0.11691 | -157.16603 | 18.10 | 16.13 |
| -1.740 | -157.28249 | 0.11690 | -157.16559 | 18.38 | 16.41 |
| -1.739 | -157.28276 | 0.11691 | -157.16585 | 18.21 | 16.24 |
| -1.720 | -157.28205 | 0.11690 | -157.16515 | 18.66 | 16.68 |
| -1.709 | -157.28209 | 0.11690 | -157.16519 | 18.63 | 16.65 |
| -1.700 | -157.28160 | 0.11689 | -157.16471 | 18.93 | 16.95 |
| -1.680 | -157.28116 | 0.11688 | -157.16428 | 19.21 | 17.23 |
| -1.679 | -157.28142 | 0.11689 | -157.16454 | 19.05 | 17.07 |
| -1.660 | -157.28072 | 0.11688 | -157.16384 | 19.49 | 17.50 |
| -1.649 | -157.28076 | 0.11688 | -157.16388 | 19.46 | 17.48 |
| -1.640 | -157.28027 | 0.11687 | -157.16341 | 19.77 | 17.77 |

|        |            |         |            |       |       |
|--------|------------|---------|------------|-------|-------|
| -1.620 | -157.27983 | 0.11686 | -157.16297 | 20.04 | 18.05 |
| -1.619 | -157.28010 | 0.11687 | -157.16323 | 19.88 | 17.89 |
| -1.600 | -157.27939 | 0.11685 | -157.16254 | 20.32 | 18.32 |
| -1.589 | -157.27943 | 0.11686 | -157.16258 | 20.29 | 18.29 |
| -1.580 | -157.27895 | 0.11685 | -157.16211 | 20.60 | 18.59 |
| -1.560 | -157.27852 | 0.11684 | -157.16168 | 20.87 | 18.86 |
| -1.559 | -157.27878 | 0.11685 | -157.16193 | 20.71 | 18.70 |
| -1.540 | -157.27808 | 0.11683 | -157.16125 | 21.14 | 19.13 |
| -1.529 | -157.27812 | 0.11683 | -157.16129 | 21.12 | 19.10 |
| -1.520 | -157.27765 | 0.11683 | -157.16082 | 21.42 | 19.40 |
| -1.500 | -157.27722 | 0.11682 | -157.16040 | 21.69 | 19.66 |
| -1.499 | -157.27747 | 0.11682 | -157.16065 | 21.53 | 19.51 |
| -1.480 | -157.27679 | 0.11681 | -157.15997 | 21.96 | 19.93 |
| -1.469 | -157.27683 | 0.11681 | -157.16001 | 21.93 | 19.90 |
| -1.460 | -157.27636 | 0.11681 | -157.15955 | 22.23 | 20.19 |
| -1.440 | -157.27593 | 0.11680 | -157.15913 | 22.49 | 20.46 |
| -1.439 | -157.27618 | 0.11680 | -157.15938 | 22.33 | 20.30 |
| -1.420 | -157.27551 | 0.11679 | -157.15872 | 22.76 | 20.72 |
| -1.409 | -157.27555 | 0.11679 | -157.15875 | 22.73 | 20.69 |
| -1.400 | -157.27509 | 0.11679 | -157.15830 | 23.02 | 20.98 |
| -1.380 | -157.27467 | 0.11678 | -157.15789 | 23.28 | 21.24 |
| -1.379 | -157.27492 | 0.11678 | -157.15814 | 23.13 | 21.08 |
| -1.360 | -157.27425 | 0.11677 | -157.15748 | 23.55 | 21.49 |
| -1.349 | -157.27429 | 0.11677 | -157.15752 | 23.52 | 21.47 |
| -1.340 | -157.27384 | 0.11677 | -157.15708 | 23.80 | 21.75 |
| -1.320 | -157.27343 | 0.11676 | -157.15667 | 24.06 | 22.00 |
| -1.319 | -157.27368 | 0.11676 | -157.15691 | 23.91 | 21.85 |
| -1.300 | -157.27303 | 0.11675 | -157.15628 | 24.32 | 22.25 |
| -1.289 | -157.27307 | 0.11675 | -157.15631 | 24.29 | 22.23 |
| -1.280 | -157.27262 | 0.11675 | -157.15588 | 24.57 | 22.50 |
| -1.260 | -157.27223 | 0.11674 | -157.15549 | 24.82 | 22.74 |
| -1.259 | -157.27246 | 0.11674 | -157.15572 | 24.67 | 22.60 |
| -1.240 | -157.27183 | 0.11673 | -157.15510 | 25.07 | 22.99 |
| -1.229 | -157.27187 | 0.11673 | -157.15514 | 25.04 | 22.96 |
| -1.220 | -157.27144 | 0.11673 | -157.15472 | 25.31 | 23.23 |
| -1.200 | -157.27106 | 0.11672 | -157.15434 | 25.55 | 23.47 |
| -1.199 | -157.27128 | 0.11672 | -157.15456 | 25.41 | 23.32 |
| -1.180 | -157.27067 | 0.11671 | -157.15396 | 25.79 | 23.70 |
| -1.169 | -157.27071 | 0.11671 | -157.15400 | 25.77 | 23.68 |
| -1.160 | -157.27030 | 0.11671 | -157.15359 | 26.03 | 23.93 |
| -1.140 | -157.26992 | 0.11670 | -157.15322 | 26.26 | 24.16 |
| -1.139 | -157.27014 | 0.11670 | -157.15344 | 26.12 | 24.03 |
| -1.120 | -157.26956 | 0.11669 | -157.15286 | 26.49 | 24.39 |
| -1.109 | -157.26959 | 0.11669 | -157.15290 | 26.47 | 24.37 |
| -1.100 | -157.26919 | 0.11669 | -157.15251 | 26.72 | 24.61 |
| -1.080 | -157.26884 | 0.11668 | -157.15216 | 26.95 | 24.83 |

|        |            |         |            |       |       |
|--------|------------|---------|------------|-------|-------|
| -1.079 | -157.26905 | 0.11668 | -157.15236 | 26.81 | 24.70 |
| -1.060 | -157.26848 | 0.11667 | -157.15181 | 27.17 | 25.05 |
| -1.049 | -157.26852 | 0.11667 | -157.15184 | 27.15 | 25.03 |
| -1.040 | -157.26814 | 0.11667 | -157.15147 | 27.38 | 25.26 |
| -1.020 | -157.26780 | 0.11666 | -157.15114 | 27.60 | 25.47 |
| -1.019 | -157.26800 | 0.11666 | -157.15133 | 27.47 | 25.35 |
| -1.000 | -157.26746 | 0.11665 | -157.15081 | 27.81 | 25.68 |
| -0.989 | -157.26749 | 0.11665 | -157.15084 | 27.79 | 25.66 |
| -0.980 | -157.26713 | 0.11665 | -157.15048 | 28.02 | 25.88 |
| -0.960 | -157.26681 | 0.11664 | -157.15017 | 28.22 | 26.08 |
| -0.959 | -157.26700 | 0.11664 | -157.15036 | 28.10 | 25.96 |
| -0.940 | -157.26649 | 0.11663 | -157.14986 | 28.42 | 26.28 |
| -0.929 | -157.26652 | 0.11664 | -157.14989 | 28.40 | 26.26 |
| -0.920 | -157.26618 | 0.11663 | -157.14955 | 28.61 | 26.47 |
| -0.900 | -157.26587 | 0.11662 | -157.14925 | 28.80 | 26.66 |
| -0.899 | -157.26606 | 0.11663 | -157.14943 | 28.69 | 26.54 |
| -0.880 | -157.26558 | 0.11662 | -157.14896 | 28.99 | 26.84 |
| -0.869 | -157.26561 | 0.11662 | -157.14899 | 28.97 | 26.82 |
| -0.860 | -157.26529 | 0.11661 | -157.14868 | 29.17 | 27.02 |
| -0.840 | -157.26500 | 0.11660 | -157.14840 | 29.35 | 27.19 |
| -0.839 | -157.26517 | 0.11661 | -157.14856 | 29.25 | 27.09 |
| -0.820 | -157.26472 | 0.11660 | -157.14813 | 29.53 | 27.36 |
| -0.809 | -157.26475 | 0.11660 | -157.14815 | 29.51 | 27.35 |
| -0.800 | -157.26445 | 0.11659 | -157.14786 | 29.70 | 27.53 |
| -0.780 | -157.26419 | 0.11658 | -157.14761 | 29.86 | 27.69 |
| -0.779 | -157.26435 | 0.11659 | -157.14776 | 29.76 | 27.59 |
| -0.760 | -157.26393 | 0.11658 | -157.14736 | 30.02 | 27.85 |
| -0.749 | -157.26396 | 0.11658 | -157.14738 | 30.01 | 27.83 |
| -0.740 | -157.26368 | 0.11657 | -157.14711 | 30.18 | 28.00 |
| -0.720 | -157.26344 | 0.11656 | -157.14688 | 30.33 | 28.15 |
| -0.719 | -157.26358 | 0.11657 | -157.14702 | 30.24 | 28.06 |
| -0.700 | -157.26321 | 0.11656 | -157.14665 | 30.48 | 28.29 |
| -0.689 | -157.26323 | 0.11656 | -157.14667 | 30.46 | 28.28 |
| -0.680 | -157.26298 | 0.11655 | -157.14643 | 30.62 | 28.43 |
| -0.660 | -157.26276 | 0.11654 | -157.14621 | 30.76 | 28.56 |
| -0.659 | -157.26289 | 0.11655 | -157.14634 | 30.68 | 28.48 |
| -0.640 | -157.26254 | 0.11654 | -157.14601 | 30.89 | 28.69 |
| -0.629 | -157.26256 | 0.11654 | -157.14603 | 30.88 | 28.68 |
| -0.620 | -157.26234 | 0.11653 | -157.14581 | 31.02 | 28.82 |
| -0.600 | -157.26214 | 0.11652 | -157.14561 | 31.15 | 28.94 |
| -0.599 | -157.26226 | 0.11653 | -157.14573 | 31.07 | 28.87 |
| -0.580 | -157.26195 | 0.11652 | -157.14543 | 31.27 | 29.06 |
| -0.569 | -157.26196 | 0.11652 | -157.14545 | 31.26 | 29.04 |
| -0.560 | -157.26176 | 0.11651 | -157.14525 | 31.38 | 29.17 |
| -0.540 | -157.26159 | 0.11650 | -157.14508 | 31.50 | 29.27 |
| -0.539 | -157.26169 | 0.11651 | -157.14518 | 31.43 | 29.21 |

|        |            |         |            |       |       |
|--------|------------|---------|------------|-------|-------|
| -0.520 | -157.26142 | 0.11650 | -157.14492 | 31.60 | 29.38 |
| -0.509 | -157.26143 | 0.11650 | -157.14493 | 31.59 | 29.37 |
| -0.500 | -157.26125 | 0.11649 | -157.14476 | 31.70 | 29.47 |
| -0.480 | -157.26110 | 0.11648 | -157.14461 | 31.80 | 29.57 |
| -0.479 | -157.26119 | 0.11649 | -157.14470 | 31.74 | 29.51 |
| -0.460 | -157.26095 | 0.11648 | -157.14447 | 31.89 | 29.66 |
| -0.449 | -157.26096 | 0.11648 | -157.14449 | 31.89 | 29.65 |
| -0.440 | -157.26081 | 0.11647 | -157.14434 | 31.98 | 29.74 |
| -0.420 | -157.26067 | 0.11646 | -157.14421 | 32.07 | 29.82 |
| -0.419 | -157.26075 | 0.11647 | -157.14428 | 32.02 | 29.77 |
| -0.400 | -157.26054 | 0.11646 | -157.14409 | 32.15 | 29.90 |
| -0.389 | -157.26056 | 0.11646 | -157.14410 | 32.14 | 29.89 |
| -0.380 | -157.26042 | 0.11645 | -157.14397 | 32.22 | 29.97 |
| -0.360 | -157.26031 | 0.11644 | -157.14387 | 32.30 | 30.04 |
| -0.359 | -157.26038 | 0.11645 | -157.14393 | 32.25 | 30.00 |
| -0.340 | -157.26020 | 0.11644 | -157.14376 | 32.36 | 30.10 |
| -0.329 | -157.26021 | 0.11644 | -157.14377 | 32.36 | 30.09 |
| -0.320 | -157.26010 | 0.11643 | -157.14367 | 32.43 | 30.16 |
| -0.300 | -157.26000 | 0.11642 | -157.14358 | 32.49 | 30.21 |
| -0.299 | -157.26006 | 0.11642 | -157.14364 | 32.45 | 30.18 |
| -0.280 | -157.25991 | 0.11641 | -157.14350 | 32.54 | 30.27 |
| -0.269 | -157.25992 | 0.11642 | -157.14351 | 32.54 | 30.26 |
| -0.260 | -157.25983 | 0.11641 | -157.14342 | 32.60 | 30.31 |
| -0.240 | -157.25975 | 0.11640 | -157.14335 | 32.65 | 30.36 |
| -0.239 | -157.25980 | 0.11640 | -157.14340 | 32.62 | 30.33 |
| -0.220 | -157.25968 | 0.11639 | -157.14329 | 32.69 | 30.40 |
| -0.209 | -157.25969 | 0.11639 | -157.14330 | 32.69 | 30.39 |
| -0.200 | -157.25962 | 0.11639 | -157.14323 | 32.73 | 30.43 |
| -0.180 | -157.25956 | 0.11638 | -157.14318 | 32.77 | 30.47 |
| -0.179 | -157.25959 | 0.11636 | -157.14323 | 32.75 | 30.44 |
| -0.160 | -157.25950 | 0.11637 | -157.14313 | 32.80 | 30.50 |
| -0.150 | -157.25951 | 0.11632 | -157.14319 | 32.80 | 30.46 |
| -0.140 | -157.25945 | 0.11636 | -157.14310 | 32.83 | 30.52 |
| -0.120 | -157.25943 | 0.11636 | -157.14308 | 32.84 | 30.53 |
| -0.120 | -157.25941 | 0.11631 | -157.14310 | 32.86 | 30.52 |
| -0.100 | -157.25937 | 0.11635 | -157.14302 | 32.89 | 30.57 |
| -0.090 | -157.25937 | 0.11635 | -157.14303 | 32.88 | 30.56 |
| -0.080 | -157.25933 | 0.11633 | -157.14300 | 32.91 | 30.58 |
| -0.060 | -157.25930 | 0.11633 | -157.14298 | 32.93 | 30.59 |
| -0.060 | -157.25932 | 0.11632 | -157.14300 | 32.91 | 30.58 |
| -0.040 | -157.25928 | 0.11630 | -157.14299 | 32.94 | 30.59 |
| -0.030 | -157.25928 | 0.11632 | -157.14296 | 32.94 | 30.60 |
| -0.020 | -157.25926 | 0.11631 | -157.14295 | 32.95 | 30.61 |
| 0.000  | -157.25923 | 0.11040 | -157.14883 | 32.97 | 30.72 |
| 0.020  | -157.25922 | 0.11627 | -157.14295 | 32.97 | 30.61 |
| 0.030  | -157.25922 | 0.11626 | -157.14296 | 32.97 | 30.58 |

|       |              |         |            |       |       |
|-------|--------------|---------|------------|-------|-------|
| 0.040 | -157.25922   | 0.11623 | -157.14299 | 32.97 | 30.58 |
| 0.060 | -157.25923   | 0.11623 | -157.14300 | 32.97 | 30.60 |
| 0.060 | -157.2592233 | 0.11626 | -157.14297 | 32.96 | 30.59 |
| 0.080 | -157.2592318 | 0.11624 | -157.14299 | 32.96 | 30.58 |
| 0.090 | -157.2592439 | 0.11624 | -157.14301 | 32.96 | 30.58 |
| 0.100 | -157.2592431 | 0.11624 | -157.14300 | 32.95 | 30.51 |
| 0.120 | -157.2592591 | 0.11614 | -157.14312 | 32.95 | 30.55 |
| 0.120 | -157.2592687 | 0.11622 | -157.14305 | 32.94 | 30.54 |
| 0.140 | -157.259275  | 0.11620 | -157.14307 | 32.93 | 30.45 |
| 0.149 | -157.2592974 | 0.11609 | -157.14321 | 32.93 | 30.52 |
| 0.160 | -157.2592967 | 0.11620 | -157.14309 | 32.91 | 30.46 |
| 0.179 | -157.2593359 | 0.11614 | -157.14319 | 32.92 | 30.51 |
| 0.180 | -157.2593204 | 0.11620 | -157.14312 | 32.90 | 30.48 |
| 0.200 | -157.2593467 | 0.11619 | -157.14315 | 32.88 | 30.45 |
| 0.209 | -157.2593779 | 0.11617 | -157.14321 | 32.88 | 30.45 |
| 0.219 | -157.2593758 | 0.11616 | -157.14321 | 32.85 | 30.41 |
| 0.239 | -157.259427  | 0.11616 | -157.14327 | 32.86 | 30.43 |
| 0.239 | -157.259408  | 0.11617 | -157.14324 | 32.84 | 30.40 |
| 0.259 | -157.2594419 | 0.11616 | -157.14328 | 32.82 | 30.37 |
| 0.269 | -157.2594813 | 0.11615 | -157.14333 | 32.82 | 30.38 |
| 0.279 | -157.2594785 | 0.11615 | -157.14333 | 32.78 | 30.33 |
| 0.299 | -157.2595406 | 0.11614 | -157.14340 | 32.79 | 30.34 |
| 0.299 | -157.2595168 | 0.11614 | -157.14338 | 32.77 | 30.31 |
| 0.319 | -157.2595585 | 0.11613 | -157.14343 | 32.74 | 30.26 |
| 0.329 | -157.2596034 | 0.11610 | -157.14350 | 32.74 | 30.28 |
| 0.339 | -157.2596004 | 0.11612 | -157.14348 | 32.70 | 30.22 |
| 0.359 | -157.2596725 | 0.11610 | -157.14357 | 32.71 | 30.24 |
| 0.359 | -157.2596459 | 0.11611 | -157.14354 | 32.68 | 30.21 |
| 0.379 | -157.259692  | 0.11610 | -157.14359 | 32.65 | 30.17 |
| 0.389 | -157.2597439 | 0.11609 | -157.14365 | 32.65 | 30.17 |
| 0.399 | -157.2597406 | 0.11609 | -157.14365 | 32.60 | 30.11 |
| 0.419 | -157.2598202 | 0.11607 | -157.14375 | 32.62 | 30.13 |
| 0.419 | -157.2597906 | 0.11608 | -157.14371 | 32.59 | 30.09 |
| 0.439 | -157.2598425 | 0.11607 | -157.14377 | 32.55 | 30.04 |
| 0.449 | -157.2598994 | 0.11605 | -157.14385 | 32.56 | 30.05 |
| 0.459 | -157.2598961 | 0.11605 | -157.14384 | 32.50 | 29.99 |
| 0.479 | -157.2599831 | 0.11604 | -157.14395 | 32.52 | 30.01 |
| 0.479 | -157.2599513 | 0.11605 | -157.14391 | 32.49 | 29.97 |
| 0.499 | -157.260007  | 0.11604 | -157.14397 | 32.45 | 29.92 |
| 0.509 | -157.260068  | 0.11602 | -157.14405 | 32.45 | 29.93 |
| 0.519 | -157.2600652 | 0.11602 | -157.14404 | 32.39 | 29.84 |
| 0.539 | -157.2601586 | 0.11599 | -157.14417 | 32.41 | 29.88 |
| 0.539 | -157.2601229 | 0.11601 | -157.14411 | 32.37 | 29.84 |
| 0.559 | -157.2601838 | 0.11600 | -157.14419 | 32.33 | 29.79 |
| 0.569 | -157.2602482 | 0.11599 | -157.14426 | 32.34 | 29.79 |
| 0.579 | -157.2602441 | 0.11599 | -157.14426 | 32.28 | 29.72 |

|       |              |         |            |       |       |
|-------|--------------|---------|------------|-------|-------|
| 0.599 | -157.2603419 | 0.11597 | -157.14437 | 32.30 | 29.75 |
| 0.599 | -157.2603062 | 0.11598 | -157.14433 | 32.26 | 29.70 |
| 0.619 | -157.2603695 | 0.11596 | -157.14441 | 32.22 | 29.65 |
| 0.629 | -157.2604377 | 0.11595 | -157.14449 | 32.22 | 29.65 |
| 0.639 | -157.2604338 | 0.11595 | -157.14448 | 32.15 | 29.57 |
| 0.659 | -157.2605359 | 0.11593 | -157.14461 | 32.18 | 29.60 |
| 0.659 | -157.2604981 | 0.11594 | -157.14456 | 32.14 | 29.55 |
| 0.679 | -157.260564  | 0.11593 | -157.14464 | 32.09 | 29.50 |
| 0.689 | -157.2606353 | 0.11591 | -157.14472 | 32.09 | 29.50 |
| 0.699 | -157.2606305 | 0.11591 | -157.14472 | 32.03 | 29.42 |
| 0.719 | -157.260736  | 0.11589 | -157.14484 | 32.05 | 29.45 |
| 0.719 | -157.2606977 | 0.11590 | -157.14480 | 32.01 | 29.40 |
| 0.739 | -157.2607657 | 0.11589 | -157.14488 | 31.96 | 29.35 |
| 0.749 | -157.2608386 | 0.11587 | -157.14497 | 31.97 | 29.35 |
| 0.759 | -157.2608349 | 0.11587 | -157.14496 | 31.90 | 29.27 |
| 0.779 | -157.2609427 | 0.11585 | -157.14509 | 31.92 | 29.30 |
| 0.779 | -157.2609034 | 0.11586 | -157.14504 | 31.88 | 29.25 |
| 0.799 | -157.2609726 | 0.11585 | -157.14512 | 31.83 | 29.19 |
| 0.809 | -157.2610474 | 0.11583 | -157.14521 | 31.84 | 29.19 |
| 0.819 | -157.2610432 | 0.11584 | -157.14521 | 31.77 | 29.11 |
| 0.839 | -157.2611542 | 0.11581 | -157.14534 | 31.79 | 29.14 |
| 0.839 | -157.2611136 | 0.11582 | -157.14529 | 31.75 | 29.09 |
| 0.859 | -157.2611842 | 0.11581 | -157.14538 | 31.70 | 29.03 |
| 0.869 | -157.2612606 | 0.11579 | -157.14547 | 31.70 | 29.03 |
| 0.879 | -157.2612561 | 0.11579 | -157.14546 | 31.63 | 28.95 |
| 0.899 | -157.2613686 | 0.11577 | -157.14560 | 31.66 | 28.98 |
| 0.899 | -157.2613275 | 0.11578 | -157.14555 | 31.61 | 28.93 |
| 0.919 | -157.2613999 | 0.11577 | -157.14563 | 31.56 | 28.87 |
| 0.929 | -157.261476  | 0.11575 | -157.14573 | 31.57 | 28.87 |
| 0.939 | -157.2614715 | 0.11575 | -157.14572 | 31.50 | 28.79 |
| 0.959 | -157.2615855 | 0.11573 | -157.14586 | 31.52 | 28.82 |
| 0.959 | -157.2615449 | 0.11574 | -157.14581 | 31.48 | 28.76 |
| 0.979 | -157.2616171 | 0.11572 | -157.14589 | 31.43 | 28.70 |
| 0.989 | -157.2616951 | 0.11571 | -157.14599 | 31.43 | 28.71 |
| 0.999 | -157.2616902 | 0.11571 | -157.14598 | 31.36 | 28.62 |
| 1.019 | -157.261804  | 0.11568 | -157.14612 | 31.38 | 28.65 |
| 1.019 | -157.2617635 | 0.11569 | -157.14607 | 31.34 | 28.60 |
| 1.039 | -157.2618365 | 0.11568 | -157.14616 | 31.29 | 28.54 |
| 1.049 | -157.2619143 | 0.11566 | -157.14625 | 31.29 | 28.54 |
| 1.059 | -157.2619088 | 0.11566 | -157.14625 | 31.22 | 28.45 |
| 1.079 | -157.2620239 | 0.11564 | -157.14639 | 31.25 | 28.49 |
| 1.079 | -157.2619826 | 0.11565 | -157.14633 | 31.20 | 28.43 |
| 1.099 | -157.2620558 | 0.11563 | -157.14642 | 31.15 | 28.37 |
| 1.109 | -157.2621344 | 0.11562 | -157.14652 | 31.15 | 28.37 |
| 1.119 | -157.2621297 | 0.11562 | -157.14651 | 31.08 | 28.29 |
| 1.139 | -157.2622438 | 0.11559 | -157.14665 | 31.11 | 28.32 |

|       |              |         |            |       |       |
|-------|--------------|---------|------------|-------|-------|
| 1.139 | -157.2622026 | 0.11560 | -157.14660 | 31.06 | 28.26 |
| 1.159 | -157.2622764 | 0.11558 | -157.14669 | 31.01 | 28.20 |
| 1.169 | -157.2623546 | 0.11557 | -157.14679 | 31.02 | 28.21 |
| 1.179 | -157.262349  | 0.11557 | -157.14678 | 30.94 | 28.11 |
| 1.199 | -157.2624636 | 0.11553 | -157.14693 | 30.97 | 28.15 |
| 1.199 | -157.2624224 | 0.11555 | -157.14688 | 30.92 | 28.09 |
| 1.219 | -157.2624955 | 0.11552 | -157.14697 | 30.87 | 28.03 |
| 1.229 | -157.262574  | 0.11550 | -157.14707 | 30.88 | 28.03 |
| 1.239 | -157.2625688 | 0.11551 | -157.14706 | 30.81 | 27.95 |
| 1.259 | -157.2626821 | 0.11549 | -157.14720 | 30.83 | 27.98 |
| 1.259 | -157.2626413 | 0.11549 | -157.14715 | 30.79 | 27.92 |
| 1.279 | -157.2627145 | 0.11548 | -157.14723 | 30.74 | 27.87 |
| 1.289 | -157.2627914 | 0.11547 | -157.14732 | 30.74 | 27.87 |
| 1.299 | -157.2627869 | 0.11547 | -157.14732 | 30.67 | 27.78 |
| 1.319 | -157.2629003 | 0.11544 | -157.14746 | 30.70 | 27.82 |
| 1.319 | -157.2628596 | 0.11545 | -157.14741 | 30.65 | 27.76 |
| 1.339 | -157.2629312 | 0.11544 | -157.14749 | 30.60 | 27.70 |
| 1.349 | -157.2630083 | 0.11543 | -157.14758 | 30.61 | 27.71 |
| 1.359 | -157.2630038 | 0.11542 | -157.14758 | 30.54 | 27.62 |
| 1.379 | -157.2631153 | 0.11541 | -157.14771 | 30.56 | 27.65 |
| 1.379 | -157.2630759 | 0.11541 | -157.14766 | 30.52 | 27.60 |
| 1.399 | -157.2631467 | 0.11540 | -157.14775 | 30.47 | 27.54 |
| 1.409 | -157.2632231 | 0.11539 | -157.14784 | 30.47 | 27.55 |
| 1.419 | -157.2632185 | 0.11539 | -157.14783 | 30.40 | 27.46 |
| 1.439 | -157.2633295 | 0.11537 | -157.14796 | 30.43 | 27.49 |
| 1.439 | -157.2632895 | 0.11537 | -157.14792 | 30.38 | 27.44 |
| 1.459 | -157.26336   | 0.11536 | -157.14800 | 30.33 | 27.39 |
| 1.469 | -157.2634351 | 0.11534 | -157.14809 | 30.34 | 27.39 |
| 1.479 | -157.2634306 | 0.11534 | -157.14809 | 30.27 | 27.31 |
| 1.499 | -157.2635405 | 0.11532 | -157.14822 | 30.29 | 27.34 |
| 1.499 | -157.2635009 | 0.11533 | -157.14817 | 30.25 | 27.28 |
| 1.519 | -157.2635709 | 0.11532 | -157.14826 | 30.20 | 27.23 |
| 1.529 | -157.2636448 | 0.11530 | -157.14834 | 30.21 | 27.23 |
| 1.539 | -157.2636404 | 0.11530 | -157.14834 | 30.14 | 27.15 |
| 1.559 | -157.2637488 | 0.11528 | -157.14847 | 30.16 | 27.18 |
| 1.559 | -157.26371   | 0.11529 | -157.14842 | 30.12 | 27.13 |
| 1.579 | -157.2637786 | 0.11528 | -157.14850 | 30.07 | 27.07 |
| 1.589 | -157.2638516 | 0.11526 | -157.14859 | 30.08 | 27.07 |
| 1.599 | -157.2638475 | 0.11526 | -157.14859 | 30.01 | 27.00 |
| 1.619 | -157.2639534 | 0.11524 | -157.14871 | 30.03 | 27.02 |
| 1.619 | -157.2639153 | 0.11525 | -157.14867 | 29.99 | 26.97 |
| 1.639 | -157.2639843 | 0.11523 | -157.14875 | 29.95 | 26.92 |
| 1.649 | -157.2640555 | 0.11522 | -157.14884 | 29.95 | 26.92 |
| 1.659 | -157.2640514 | 0.11522 | -157.14883 | 29.88 | 26.84 |
| 1.679 | -157.2641562 | 0.11520 | -157.14896 | 29.91 | 26.87 |
| 1.679 | -157.264119  | 0.11521 | -157.14891 | 29.86 | 26.82 |

|       |              |         |            |       |       |
|-------|--------------|---------|------------|-------|-------|
| 1.699 | -157.2641854 | 0.11520 | -157.14899 | 29.82 | 26.77 |
| 1.709 | -157.2642564 | 0.11518 | -157.14908 | 29.82 | 26.77 |
| 1.719 | -157.2642516 | 0.11518 | -157.14907 | 29.76 | 26.69 |
| 1.739 | -157.2643549 | 0.11516 | -157.14920 | 29.78 | 26.72 |
| 1.739 | -157.264318  | 0.11517 | -157.14915 | 29.74 | 26.67 |
| 1.759 | -157.2643837 | 0.11515 | -157.14923 | 29.70 | 26.62 |
| 1.769 | -157.2644528 | 0.11514 | -157.14931 | 29.70 | 26.62 |
| 1.779 | -157.2644492 | 0.11514 | -157.14931 | 29.63 | 26.54 |
| 1.799 | -157.2645497 | 0.11512 | -157.14943 | 29.66 | 26.57 |
| 1.799 | -157.2645142 | 0.11512 | -157.14939 | 29.62 | 26.52 |
| 1.819 | -157.2645783 | 0.11511 | -157.14946 | 29.57 | 26.47 |
| 1.829 | -157.2646465 | 0.11510 | -157.14955 | 29.58 | 26.47 |
| 1.839 | -157.2646421 | 0.11510 | -157.14954 | 29.51 | 26.40 |
| 1.859 | -157.2647418 | 0.11508 | -157.14966 | 29.54 | 26.43 |
| 1.859 | -157.2647065 | 0.11509 | -157.14962 | 29.50 | 26.38 |
| 1.879 | -157.2647699 | 0.11507 | -157.14970 | 29.46 | 26.33 |
| 1.889 | -157.2648359 | 0.11506 | -157.14978 | 29.46 | 26.33 |
| 1.899 | -157.2648325 | 0.11506 | -157.14977 | 29.40 | 26.25 |
| 1.919 | -157.2649295 | 0.11504 | -157.14989 | 29.42 | 26.28 |
| 1.919 | -157.2648949 | 0.11505 | -157.14985 | 29.38 | 26.24 |
| 1.939 | -157.2649569 | 0.11503 | -157.14992 | 29.34 | 26.19 |
| 1.949 | -157.2650224 | 0.11502 | -157.15000 | 29.34 | 26.19 |
| 1.959 | -157.2650186 | 0.11502 | -157.15000 | 29.28 | 26.12 |
| 1.979 | -157.2651134 | 0.11500 | -157.15011 | 29.30 | 26.14 |
| 1.979 | -157.2650796 | 0.11501 | -157.15007 | 29.26 | 26.10 |
| 1.999 | -157.2651404 | 0.11500 | -157.15014 | 29.22 | 26.04 |
| 2.009 | -157.2652051 | 0.11498 | -157.15023 | 29.23 | 26.05 |
| 2.019 | -157.2652005 | 0.11498 | -157.15022 | 29.17 | 25.98 |
| 2.039 | -157.2652935 | 0.11496 | -157.15033 | 29.19 | 26.00 |
| 2.039 | -157.2652603 | 0.11497 | -157.15029 | 29.15 | 25.96 |
| 2.059 | -157.2653194 | 0.11496 | -157.15036 | 29.11 | 25.91 |
| 2.069 | -157.2653828 | 0.11494 | -157.15044 | 29.11 | 25.91 |
| 2.079 | -157.2653789 | 0.11495 | -157.15043 | 29.06 | 25.84 |
| 2.099 | -157.2654697 | 0.11492 | -157.15055 | 29.08 | 25.87 |
| 2.099 | -157.2654377 | 0.11493 | -157.15051 | 29.04 | 25.82 |
| 2.119 | -157.2654955 | 0.11492 | -157.15058 | 29.00 | 25.78 |
| 2.129 | -157.2655564 | 0.11491 | -157.15065 | 29.01 | 25.78 |
| 2.139 | -157.2655534 | 0.11491 | -157.15065 | 28.95 | 25.71 |
| 2.159 | -157.2656427 | 0.11489 | -157.15075 | 28.97 | 25.74 |
| 2.159 | -157.2656106 | 0.11490 | -157.15071 | 28.93 | 25.70 |
| 2.179 | -157.2656671 | 0.11488 | -157.15078 | 28.90 | 25.65 |
| 2.189 | -157.2657267 | 0.11487 | -157.15086 | 28.90 | 25.65 |
| 2.199 | -157.2657239 | 0.11487 | -157.15085 | 28.84 | 25.58 |
| 2.219 | -157.2658102 | 0.11485 | -157.15096 | 28.86 | 25.61 |
| 2.219 | -157.2657796 | 0.11486 | -157.15092 | 28.83 | 25.57 |
| 2.239 | -157.2658349 | 0.11485 | -157.15099 | 28.79 | 25.52 |



|       |              |         |            |       |       |
|-------|--------------|---------|------------|-------|-------|
| 2.249 | -157.2658931 | 0.11483 | -157.15106 | 28.79 | 25.52 |
| 2.259 | -157.2658904 | 0.11484 | -157.15106 | 28.74 | 25.46 |
| 2.279 | -157.2659749 | 0.11482 | -157.15116 | 28.76 | 25.48 |
| 2.279 | -157.2659447 | 0.11482 | -157.15112 | 28.73 | 25.44 |
| 2.299 | -157.2659988 | 0.11481 | -157.15119 | 28.69 | 25.40 |
| 2.308 | -157.266056  | 0.11480 | -157.15126 | 28.69 | 25.40 |
| 2.319 | -157.2660526 | 0.11480 | -157.15125 | 28.64 | 25.34 |
| 2.338 | -157.2661348 | 0.11478 | -157.15135 | 28.66 | 25.36 |
| 2.339 | -157.2661056 | 0.11479 | -157.15132 | 28.63 | 25.32 |
| 2.359 | -157.2661583 | 0.11478 | -157.15138 | 28.59 | 25.28 |
| 2.368 | -157.2662138 | 0.11477 | -157.15145 | 28.59 | 25.28 |
| 2.379 | -157.2662105 | 0.11477 | -157.15145 | 28.54 | 25.21 |
| 2.398 | -157.2662914 | 0.11474 | -157.15156 | 28.56 | 25.24 |
| 2.399 | -157.2662628 | 0.11475 | -157.15151 | 28.53 | 25.20 |
| 2.419 | -157.2663138 | 0.11474 | -157.15157 | 28.49 | 25.16 |
| 2.428 | -157.2663686 | 0.11473 | -157.15164 | 28.50 | 25.16 |
| 2.439 | -157.2663652 | 0.11473 | -157.15163 | 28.45 | 25.10 |
| 2.458 | -157.2664437 | 0.11471 | -157.15173 | 28.46 | 25.12 |
| 2.459 | -157.2664158 | 0.11472 | -157.15169 | 28.43 | 25.08 |
| 2.479 | -157.266466  | 0.11471 | -157.15176 | 28.40 | 25.04 |
| 2.488 | -157.2665185 | 0.11470 | -157.15182 | 28.40 | 25.05 |
| 2.499 | -157.2665157 | 0.11470 | -157.15182 | 28.35 | 24.98 |
| 2.518 | -157.2665918 | 0.11467 | -157.15192 | 28.37 | 25.01 |
| 2.519 | -157.2665648 | 0.11469 | -157.15188 | 28.34 | 24.97 |
| 2.539 | -157.2666141 | 0.11468 | -157.15194 | 28.31 | 24.93 |
| 2.548 | -157.2666653 | 0.11466 | -157.15200 | 28.31 | 24.93 |
| 2.559 | -157.2666625 | 0.11467 | -157.15200 | 28.26 | 24.88 |
| 2.578 | -157.2667364 | 0.11465 | -157.15209 | 28.28 | 24.90 |
| 2.579 | -157.2667108 | 0.11465 | -157.15206 | 28.25 | 24.86 |
| 2.599 | -157.2667577 | 0.11465 | -157.15211 | 28.22 | 24.82 |
| 2.608 | -157.2668069 | 0.11463 | -157.15217 | 28.22 | 24.83 |
| 2.619 | -157.2668053 | 0.11464 | -157.15217 | 28.17 | 24.77 |
| 2.638 | -157.2668767 | 0.11461 | -157.15227 | 28.19 | 24.79 |
| 2.639 | -157.2668514 | 0.11462 | -157.15223 | 28.16 | 24.75 |
| 2.659 | -157.2668977 | 0.11461 | -157.15228 | 28.13 | 24.72 |
| 2.668 | -157.2669461 | 0.11460 | -157.15235 | 28.13 | 24.72 |
| 2.679 | -157.2669435 | 0.11460 | -157.15234 | 28.09 | 24.66 |
| 2.698 | -157.2670137 | 0.11459 | -157.15243 | 28.10 | 24.68 |
| 2.699 | -157.266989  | 0.11459 | -157.15240 | 28.08 | 24.65 |
| 2.719 | -157.2670342 | 0.11458 | -157.15245 | 28.05 | 24.61 |
| 2.728 | -157.2670812 | 0.11457 | -157.15251 | 28.05 | 24.61 |
| 2.739 | -157.2670787 | 0.11457 | -157.15251 | 28.01 | 24.56 |
| 2.758 | -157.2671465 | 0.11455 | -157.15260 | 28.02 | 24.58 |
| 2.759 | -157.2671229 | 0.11456 | -157.15256 | 27.99 | 24.55 |
| 2.779 | -157.2671667 | 0.11455 | -157.15261 | 27.96 | 24.51 |
| 2.788 | -157.2672122 | 0.11454 | -157.15267 | 27.97 | 24.51 |

|       |              |         |            |       |       |
|-------|--------------|---------|------------|-------|-------|
| 2.799 | -157.2672107 | 0.11454 | -157.15267 | 27.92 | 24.46 |
| 2.818 | -157.2672756 | 0.11453 | -157.15275 | 27.94 | 24.48 |
| 2.819 | -157.2672529 | 0.11453 | -157.15272 | 27.91 | 24.45 |
| 2.839 | -157.2672951 | 0.11452 | -157.15277 | 27.88 | 24.41 |
| 2.848 | -157.2673399 | 0.11451 | -157.15283 | 27.89 | 24.41 |
| 2.859 | -157.2673374 | 0.11451 | -157.15283 | 27.85 | 24.36 |
| 2.878 | -157.2674016 | 0.11448 | -157.15292 | 27.86 | 24.38 |
| 2.879 | -157.267379  | 0.11450 | -157.15288 | 27.83 | 24.35 |
| 2.899 | -157.2674204 | 0.11449 | -157.15293 | 27.81 | 24.32 |
| 2.908 | -157.2674635 | 0.11448 | -157.15298 | 27.81 | 24.31 |
| 2.919 | -157.2674616 | 0.11448 | -157.15298 | 27.77 | 24.27 |
| 2.938 | -157.2675233 | 0.11447 | -157.15306 | 27.78 | 24.29 |
| 2.939 | -157.2675017 | 0.11447 | -157.15303 | 27.76 | 24.26 |
| 2.959 | -157.2675422 | 0.11447 | -157.15308 | 27.73 | 24.22 |
| 2.968 | -157.2675834 | 0.11446 | -157.15313 | 27.73 | 24.22 |
| 2.979 | -157.2675815 | 0.11445 | -157.15314 | 27.69 | 24.18 |
| 2.998 | -157.2676421 | 0.11444 | -157.15320 | 27.71 | 24.19 |
| 2.999 | -157.2676212 | 0.11445 | -157.15318 | 27.68 | 24.17 |
| 3.019 | -157.2676596 | 0.11444 | -157.15322 | 27.66 | 24.13 |
| 3.028 | -157.267701  | 0.11442 | -157.15328 | 27.66 | 24.14 |
| 3.039 | -157.2676984 | 0.11443 | -157.15327 | 27.62 | 24.09 |
| 3.058 | -157.267757  | 0.11441 | -157.15335 | 27.64 | 24.10 |
| 3.059 | -157.2677365 | 0.11442 | -157.15332 | 27.61 | 24.08 |
| 3.079 | -157.2677743 | 0.11441 | -157.15336 | 27.59 | 24.04 |
| 3.088 | -157.2678139 | 0.11440 | -157.15341 | 27.59 | 24.05 |
| 3.099 | -157.2678121 | 0.11440 | -157.15341 | 27.55 | 24.00 |

**SI Table 36:** Potential energy data along the MEP for reaction  $\text{CC}\cdot\text{CC} \rightarrow \text{C}\cdot + \text{C}=\text{CC}$ . All data calculated with GAUSSIAN 03 program at the CCSD(T)/cc-pVDZ//BH&HLYP/cc-pVDZ level of theory.

| Reaction $\text{CC}\cdot\text{CC} \rightarrow \text{C}\cdot + \text{C}=\text{CC}$                       |                          |                  |                           |                                                            |                                                             |
|---------------------------------------------------------------------------------------------------------|--------------------------|------------------|---------------------------|------------------------------------------------------------|-------------------------------------------------------------|
| $E_{\text{CC}\cdot\text{CC}} = -157.3092267$ hartree $ZPE_{\text{CC}\cdot\text{CC}} = 0.119855$ hartree |                          |                  |                           |                                                            |                                                             |
| Reaction coordinate<br>(amu <sup>1/2</sup><br>bohr)                                                     | $V_{\text{c}}$ (Hartree) | ZPE<br>(Hartree) | $V_{\text{ag}}$ (Hartree) | $V_{\text{c}} - E_{\text{CC}\cdot\text{CC}}$<br>(kcal/mol) | $V_{\text{ag}} - E_{\text{CC}\cdot\text{CC}}$<br>(kcal/mol) |
| -1.950                                                                                                  | -157.29426               | 0.11700          | -157.17726                | 9.39                                                       | 7.60                                                        |
| -1.940                                                                                                  | -157.29395               | 0.11699          | -157.17696                | 9.59                                                       | 7.79                                                        |
| -1.930                                                                                                  | -157.29364               | 0.11698          | -157.17666                | 9.78                                                       | 7.98                                                        |
| -1.920                                                                                                  | -157.29333               | 0.11697          | -157.17635                | 9.98                                                       | 8.17                                                        |
| -1.910                                                                                                  | -157.29301               | 0.11697          | -157.17605                | 10.17                                                      | 8.36                                                        |
| -1.900                                                                                                  | -157.29270               | 0.11696          | -157.17574                | 10.37                                                      | 8.55                                                        |
| -1.890                                                                                                  | -157.29238               | 0.11695          | -157.17543                | 10.57                                                      | 8.75                                                        |
| -1.880                                                                                                  | -157.29206               | 0.11694          | -157.17513                | 10.77                                                      | 8.94                                                        |
| -1.870                                                                                                  | -157.29175               | 0.11693          | -157.17482                | 10.97                                                      | 9.13                                                        |
| -1.860                                                                                                  | -157.29143               | 0.11692          | -157.17451                | 11.17                                                      | 9.33                                                        |
| -1.850                                                                                                  | -157.29111               | 0.11691          | -157.17420                | 11.37                                                      | 9.52                                                        |
| -1.840                                                                                                  | -157.29079               | 0.11690          | -157.17389                | 11.57                                                      | 9.72                                                        |
| -1.830                                                                                                  | -157.29048               | 0.11690          | -157.17358                | 11.77                                                      | 9.91                                                        |
| -1.820                                                                                                  | -157.29016               | 0.11689          | -157.17327                | 11.97                                                      | 10.11                                                       |
| -1.810                                                                                                  | -157.28984               | 0.11688          | -157.17296                | 12.17                                                      | 10.30                                                       |
| -1.800                                                                                                  | -157.28952               | 0.11687          | -157.17265                | 12.37                                                      | 10.50                                                       |
| -1.790                                                                                                  | -157.28920               | 0.11686          | -157.17234                | 12.57                                                      | 10.69                                                       |
| -1.780                                                                                                  | -157.28888               | 0.11685          | -157.17202                | 12.77                                                      | 10.89                                                       |
| -1.770                                                                                                  | -157.28856               | 0.11685          | -157.17171                | 12.97                                                      | 11.08                                                       |
| -1.760                                                                                                  | -157.28824               | 0.11684          | -157.17140                | 13.17                                                      | 11.28                                                       |
| -1.750                                                                                                  | -157.28792               | 0.11683          | -157.17109                | 13.37                                                      | 11.47                                                       |
| -1.740                                                                                                  | -157.28760               | 0.11682          | -157.17078                | 13.57                                                      | 11.67                                                       |
| -1.730                                                                                                  | -157.28728               | 0.11681          | -157.17047                | 13.77                                                      | 11.86                                                       |
| -1.720                                                                                                  | -157.28696               | 0.11680          | -157.17016                | 13.97                                                      | 12.06                                                       |
| -1.710                                                                                                  | -157.28664               | 0.11679          | -157.16985                | 14.17                                                      | 12.25                                                       |
| -1.700                                                                                                  | -157.28632               | 0.11679          | -157.16954                | 14.37                                                      | 12.45                                                       |
| -1.690                                                                                                  | -157.28601               | 0.11678          | -157.16923                | 14.57                                                      | 12.64                                                       |
| -1.680                                                                                                  | -157.28569               | 0.11677          | -157.16892                | 14.77                                                      | 12.83                                                       |
| -1.670                                                                                                  | -157.28537               | 0.11676          | -157.16861                | 14.97                                                      | 13.03                                                       |
| -1.660                                                                                                  | -157.28506               | 0.11675          | -157.16830                | 15.17                                                      | 13.22                                                       |
| -1.650                                                                                                  | -157.28474               | 0.11674          | -157.16800                | 15.37                                                      | 13.41                                                       |

|        |            |         |            |       |       |
|--------|------------|---------|------------|-------|-------|
| -1.640 | -157.28443 | 0.11673 | -157.16769 | 15.56 | 13.61 |
| -1.630 | -157.28411 | 0.11673 | -157.16739 | 15.76 | 13.80 |
| -1.620 | -157.28380 | 0.11672 | -157.16708 | 15.96 | 13.99 |
| -1.610 | -157.28349 | 0.11671 | -157.16678 | 16.15 | 14.18 |
| -1.600 | -157.28318 | 0.11670 | -157.16648 | 16.35 | 14.37 |
| -1.590 | -157.28287 | 0.11669 | -157.16617 | 16.54 | 14.56 |
| -1.580 | -157.28256 | 0.11668 | -157.16587 | 16.73 | 14.74 |
| -1.570 | -157.28225 | 0.11668 | -157.16558 | 16.93 | 14.93 |
| -1.560 | -157.28195 | 0.11667 | -157.16528 | 17.12 | 15.12 |
| -1.550 | -157.28164 | 0.11666 | -157.16498 | 17.31 | 15.30 |
| -1.540 | -157.28134 | 0.11665 | -157.16469 | 17.50 | 15.49 |
| -1.530 | -157.28104 | 0.11664 | -157.16439 | 17.69 | 15.67 |
| -1.520 | -157.28074 | 0.11663 | -157.16410 | 17.88 | 15.86 |
| -1.510 | -157.28044 | 0.11662 | -157.16381 | 18.07 | 16.04 |
| -1.500 | -157.28014 | 0.11662 | -157.16352 | 18.25 | 16.22 |
| -1.490 | -157.27984 | 0.11661 | -157.16324 | 18.44 | 16.40 |
| -1.480 | -157.27955 | 0.11660 | -157.16295 | 18.62 | 16.58 |
| -1.470 | -157.27926 | 0.11659 | -157.16267 | 18.80 | 16.76 |
| -1.460 | -157.27897 | 0.11658 | -157.16239 | 18.99 | 16.93 |
| -1.450 | -157.27868 | 0.11658 | -157.16211 | 19.17 | 17.11 |
| -1.440 | -157.27840 | 0.11657 | -157.16183 | 19.35 | 17.28 |
| -1.430 | -157.27811 | 0.11656 | -157.16155 | 19.52 | 17.46 |
| -1.420 | -157.27783 | 0.11655 | -157.16128 | 19.70 | 17.63 |
| -1.410 | -157.27755 | 0.11654 | -157.16101 | 19.88 | 17.80 |
| -1.400 | -157.27727 | 0.11653 | -157.16074 | 20.05 | 17.97 |
| -1.390 | -157.27700 | 0.11652 | -157.16047 | 20.22 | 18.13 |
| -1.380 | -157.27672 | 0.11652 | -157.16021 | 20.40 | 18.30 |
| -1.370 | -157.27645 | 0.11651 | -157.15995 | 20.57 | 18.46 |
| -1.360 | -157.27619 | 0.11650 | -157.15969 | 20.73 | 18.63 |
| -1.350 | -157.27592 | 0.11649 | -157.15943 | 20.90 | 18.79 |
| -1.340 | -157.27566 | 0.11648 | -157.15917 | 21.07 | 18.95 |
| -1.330 | -157.27539 | 0.11647 | -157.15892 | 21.23 | 19.11 |
| -1.320 | -157.27514 | 0.11647 | -157.15867 | 21.39 | 19.27 |
| -1.310 | -157.27488 | 0.11646 | -157.15842 | 21.55 | 19.42 |
| -1.300 | -157.27463 | 0.11645 | -157.15818 | 21.71 | 19.57 |
| -1.290 | -157.27438 | 0.11644 | -157.15794 | 21.87 | 19.73 |
| -1.280 | -157.27413 | 0.11643 | -157.15770 | 22.03 | 19.88 |
| -1.270 | -157.27388 | 0.11642 | -157.15746 | 22.18 | 20.03 |
| -1.260 | -157.27364 | 0.11641 | -157.15722 | 22.33 | 20.17 |
| -1.250 | -157.27340 | 0.11641 | -157.15699 | 22.48 | 20.32 |
| -1.240 | -157.27316 | 0.11640 | -157.15676 | 22.63 | 20.46 |
| -1.230 | -157.27293 | 0.11639 | -157.15654 | 22.78 | 20.60 |
| -1.220 | -157.27270 | 0.11638 | -157.15632 | 22.92 | 20.74 |
| -1.210 | -157.27247 | 0.11637 | -157.15609 | 23.07 | 20.88 |
| -1.200 | -157.27224 | 0.11636 | -157.15588 | 23.21 | 21.02 |
| -1.190 | -157.27202 | 0.11636 | -157.15566 | 23.35 | 21.15 |

|        |            |         |            |       |       |
|--------|------------|---------|------------|-------|-------|
| -1.180 | -157.27180 | 0.11635 | -157.15545 | 23.49 | 21.29 |
| -1.170 | -157.27158 | 0.11634 | -157.15524 | 23.62 | 21.42 |
| -1.160 | -157.27136 | 0.11633 | -157.15503 | 23.76 | 21.55 |
| -1.150 | -157.27115 | 0.11632 | -157.15483 | 23.89 | 21.67 |
| -1.140 | -157.27094 | 0.11631 | -157.15463 | 24.02 | 21.80 |
| -1.130 | -157.27074 | 0.11630 | -157.15443 | 24.15 | 21.92 |
| -1.120 | -157.27053 | 0.11630 | -157.15424 | 24.28 | 22.05 |
| -1.110 | -157.27033 | 0.11629 | -157.15405 | 24.41 | 22.17 |
| -1.100 | -157.27014 | 0.11628 | -157.15386 | 24.53 | 22.29 |
| -1.090 | -157.26994 | 0.11627 | -157.15367 | 24.65 | 22.40 |
| -1.080 | -157.26975 | 0.11626 | -157.15349 | 24.77 | 22.52 |
| -1.070 | -157.26956 | 0.11625 | -157.15331 | 24.89 | 22.63 |
| -1.060 | -157.26938 | 0.11625 | -157.15313 | 25.01 | 22.74 |
| -1.050 | -157.26919 | 0.11624 | -157.15296 | 25.12 | 22.85 |
| -1.040 | -157.26901 | 0.11623 | -157.15278 | 25.23 | 22.96 |
| -1.030 | -157.26884 | 0.11622 | -157.15261 | 25.35 | 23.07 |
| -1.020 | -157.26865 | 0.11621 | -157.15244 | 25.46 | 23.17 |
| -1.010 | -157.26848 | 0.11620 | -157.15227 | 25.57 | 23.28 |
| -1.000 | -157.26830 | 0.11620 | -157.15211 | 25.68 | 23.38 |
| -0.990 | -157.26813 | 0.11619 | -157.15195 | 25.79 | 23.48 |
| -0.980 | -157.26797 | 0.11618 | -157.15179 | 25.89 | 23.58 |
| -0.970 | -157.26781 | 0.11617 | -157.15164 | 25.99 | 23.68 |
| -0.960 | -157.26765 | 0.11616 | -157.15149 | 26.09 | 23.77 |
| -0.950 | -157.26749 | 0.11616 | -157.15134 | 26.19 | 23.87 |
| -0.940 | -157.26734 | 0.11615 | -157.15119 | 26.28 | 23.96 |
| -0.930 | -157.26719 | 0.11614 | -157.15105 | 26.38 | 24.05 |
| -0.920 | -157.26704 | 0.11613 | -157.15091 | 26.47 | 24.13 |
| -0.910 | -157.26689 | 0.11612 | -157.15077 | 26.56 | 24.22 |
| -0.900 | -157.26675 | 0.11612 | -157.15063 | 26.66 | 24.31 |
| -0.890 | -157.26660 | 0.11611 | -157.15050 | 26.75 | 24.39 |
| -0.880 | -157.26646 | 0.11610 | -157.15036 | 26.84 | 24.48 |
| -0.870 | -157.26632 | 0.11609 | -157.15023 | 26.92 | 24.56 |
| -0.860 | -157.26618 | 0.11608 | -157.15010 | 27.01 | 24.64 |
| -0.850 | -157.26605 | 0.11607 | -157.14997 | 27.10 | 24.72 |
| -0.840 | -157.26591 | 0.11607 | -157.14985 | 27.18 | 24.80 |
| -0.830 | -157.26578 | 0.11606 | -157.14972 | 27.26 | 24.88 |
| -0.820 | -157.26565 | 0.11605 | -157.14960 | 27.35 | 24.96 |
| -0.810 | -157.26552 | 0.11604 | -157.14948 | 27.43 | 25.03 |
| -0.800 | -157.26539 | 0.11603 | -157.14936 | 27.51 | 25.11 |
| -0.790 | -157.26526 | 0.11602 | -157.14924 | 27.59 | 25.18 |
| -0.780 | -157.26514 | 0.11602 | -157.14912 | 27.66 | 25.26 |
| -0.770 | -157.26502 | 0.11601 | -157.14901 | 27.74 | 25.33 |
| -0.760 | -157.26490 | 0.11600 | -157.14890 | 27.82 | 25.40 |
| -0.750 | -157.26478 | 0.11599 | -157.14879 | 27.89 | 25.47 |
| -0.740 | -157.26466 | 0.11598 | -157.14868 | 27.96 | 25.53 |
| -0.730 | -157.26455 | 0.11597 | -157.14857 | 28.04 | 25.60 |

|        |            |         |            |       |       |
|--------|------------|---------|------------|-------|-------|
| -0.720 | -157.26443 | 0.11597 | -157.14847 | 28.11 | 25.67 |
| -0.710 | -157.26432 | 0.11596 | -157.14837 | 28.18 | 25.73 |
| -0.700 | -157.26421 | 0.11595 | -157.14827 | 28.25 | 25.79 |
| -0.690 | -157.26411 | 0.11594 | -157.14817 | 28.31 | 25.86 |
| -0.680 | -157.26400 | 0.11593 | -157.14807 | 28.38 | 25.92 |
| -0.670 | -157.26390 | 0.11592 | -157.14797 | 28.44 | 25.98 |
| -0.660 | -157.26380 | 0.11592 | -157.14788 | 28.51 | 26.04 |
| -0.650 | -157.26370 | 0.11591 | -157.14779 | 28.57 | 26.09 |
| -0.640 | -157.26360 | 0.11590 | -157.14770 | 28.63 | 26.15 |
| -0.630 | -157.26350 | 0.11589 | -157.14761 | 28.69 | 26.20 |
| -0.620 | -157.26341 | 0.11588 | -157.14753 | 28.75 | 26.26 |
| -0.610 | -157.26332 | 0.11587 | -157.14744 | 28.81 | 26.31 |
| -0.600 | -157.26323 | 0.11587 | -157.14736 | 28.87 | 26.36 |
| -0.590 | -157.26314 | 0.11586 | -157.14728 | 28.92 | 26.41 |
| -0.580 | -157.26305 | 0.11585 | -157.14720 | 28.98 | 26.46 |
| -0.570 | -157.26297 | 0.11584 | -157.14713 | 29.03 | 26.51 |
| -0.560 | -157.26288 | 0.11583 | -157.14705 | 29.08 | 26.56 |
| -0.550 | -157.26280 | 0.11582 | -157.14698 | 29.13 | 26.60 |
| -0.540 | -157.26272 | 0.11582 | -157.14691 | 29.18 | 26.65 |
| -0.530 | -157.26265 | 0.11581 | -157.14684 | 29.23 | 26.69 |
| -0.520 | -157.26257 | 0.11580 | -157.14677 | 29.28 | 26.73 |
| -0.510 | -157.26250 | 0.11579 | -157.14670 | 29.32 | 26.77 |
| -0.500 | -157.26242 | 0.11578 | -157.14664 | 29.37 | 26.81 |
| -0.490 | -157.26235 | 0.11577 | -157.14658 | 29.41 | 26.85 |
| -0.480 | -157.26229 | 0.11577 | -157.14652 | 29.46 | 26.89 |
| -0.470 | -157.26222 | 0.11576 | -157.14646 | 29.50 | 26.93 |
| -0.460 | -157.26215 | 0.11575 | -157.14640 | 29.54 | 26.96 |
| -0.450 | -157.26209 | 0.11574 | -157.14635 | 29.58 | 27.00 |
| -0.440 | -157.26203 | 0.11573 | -157.14629 | 29.62 | 27.03 |
| -0.430 | -157.26197 | 0.11573 | -157.14624 | 29.66 | 27.06 |
| -0.420 | -157.26191 | 0.11572 | -157.14619 | 29.69 | 27.10 |
| -0.410 | -157.26185 | 0.11571 | -157.14614 | 29.73 | 27.13 |
| -0.400 | -157.26180 | 0.11570 | -157.14610 | 29.76 | 27.16 |
| -0.390 | -157.26175 | 0.11569 | -157.14605 | 29.80 | 27.18 |
| -0.380 | -157.26169 | 0.11569 | -157.14601 | 29.83 | 27.21 |
| -0.370 | -157.26164 | 0.11568 | -157.14597 | 29.86 | 27.24 |
| -0.360 | -157.26160 | 0.11567 | -157.14593 | 29.89 | 27.26 |
| -0.350 | -157.26155 | 0.11566 | -157.14589 | 29.92 | 27.29 |
| -0.340 | -157.26150 | 0.11565 | -157.14585 | 29.95 | 27.31 |
| -0.330 | -157.26146 | 0.11564 | -157.14582 | 29.97 | 27.33 |
| -0.320 | -157.26142 | 0.11564 | -157.14578 | 30.00 | 27.35 |
| -0.310 | -157.26138 | 0.11563 | -157.14575 | 30.03 | 27.37 |
| -0.300 | -157.26134 | 0.11562 | -157.14572 | 30.05 | 27.39 |
| -0.290 | -157.26130 | 0.11561 | -157.14569 | 30.07 | 27.41 |
| -0.280 | -157.26127 | 0.11561 | -157.14566 | 30.10 | 27.43 |
| -0.270 | -157.26123 | 0.11560 | -157.14563 | 30.12 | 27.45 |

|        |            |         |            |       |       |
|--------|------------|---------|------------|-------|-------|
| -0.260 | -157.26120 | 0.11559 | -157.14561 | 30.14 | 27.46 |
| -0.250 | -157.26117 | 0.11558 | -157.14559 | 30.16 | 27.48 |
| -0.240 | -157.26114 | 0.11557 | -157.14557 | 30.18 | 27.49 |
| -0.230 | -157.26111 | 0.11557 | -157.14554 | 30.19 | 27.50 |
| -0.220 | -157.26108 | 0.11556 | -157.14552 | 30.21 | 27.52 |
| -0.210 | -157.26106 | 0.11555 | -157.14551 | 30.23 | 27.53 |
| -0.200 | -157.26103 | 0.11554 | -157.14549 | 30.24 | 27.54 |
| -0.190 | -157.26101 | 0.11553 | -157.14547 | 30.26 | 27.55 |
| -0.180 | -157.26099 | 0.11553 | -157.14546 | 30.27 | 27.55 |
| -0.170 | -157.26097 | 0.11552 | -157.14545 | 30.28 | 27.56 |
| -0.160 | -157.26095 | 0.11551 | -157.14544 | 30.30 | 27.57 |
| -0.150 | -157.26093 | 0.11550 | -157.14543 | 30.31 | 27.58 |
| -0.140 | -157.26091 | 0.11550 | -157.14542 | 30.32 | 27.58 |
| -0.130 | -157.26090 | 0.11549 | -157.14541 | 30.33 | 27.59 |
| -0.120 | -157.26088 | 0.11548 | -157.14541 | 30.34 | 27.59 |
| -0.110 | -157.26087 | 0.11547 | -157.14540 | 30.34 | 27.59 |
| -0.100 | -157.26086 | 0.11546 | -157.14539 | 30.35 | 27.60 |
| -0.090 | -157.26085 | 0.11545 | -157.14539 | 30.36 | 27.60 |
| -0.080 | -157.26084 | 0.11545 | -157.14539 | 30.36 | 27.60 |
| -0.070 | -157.26083 | 0.11544 | -157.14539 | 30.37 | 27.60 |
| -0.060 | -157.26082 | 0.11543 | -157.14539 | 30.37 | 27.60 |
| -0.050 | -157.26082 | 0.11542 | -157.14540 | 30.38 | 27.60 |
| -0.040 | -157.26081 | 0.11540 | -157.14541 | 30.38 | 27.59 |
| -0.030 | -157.26081 | 0.11538 | -157.14542 | 30.38 | 27.58 |
| -0.020 | -157.26080 | 0.11533 | -157.14548 | 30.39 | 27.54 |
| -0.010 | -157.26080 | 0.11536 | -157.14545 | 30.39 | 27.56 |
| 0.000  | -157.26080 | 0.11141 | -157.14939 | 30.39 | 27.59 |
| 0.010  | -157.26081 | 0.11532 | -157.14549 | 30.38 | 27.54 |
| 0.020  | -157.26081 | 0.11528 | -157.14553 | 30.38 | 27.51 |
| 0.030  | -157.26081 | 0.11532 | -157.14549 | 30.38 | 27.54 |
| 0.040  | -157.26082 | 0.11533 | -157.14549 | 30.38 | 27.54 |
| 0.050  | -157.26082 | 0.11533 | -157.14549 | 30.37 | 27.53 |
| 0.060  | -157.26083 | 0.11532 | -157.14550 | 30.37 | 27.53 |
| 0.070  | -157.26084 | 0.11532 | -157.14552 | 30.36 | 27.52 |
| 0.080  | -157.26085 | 0.11531 | -157.14553 | 30.36 | 27.51 |
| 0.090  | -157.26086 | 0.11530 | -157.14555 | 30.35 | 27.50 |
| 0.100  | -157.26086 | 0.11530 | -157.14557 | 30.35 | 27.49 |
| 0.110  | -157.26088 | 0.11529 | -157.14558 | 30.34 | 27.48 |
| 0.120  | -157.26089 | 0.11528 | -157.14561 | 30.33 | 27.46 |
| 0.130  | -157.26090 | 0.11528 | -157.14562 | 30.33 | 27.45 |
| 0.140  | -157.26091 | 0.11527 | -157.14564 | 30.32 | 27.44 |
| 0.150  | -157.26093 | 0.11526 | -157.14567 | 30.31 | 27.43 |
| 0.160  | -157.26094 | 0.11526 | -157.14568 | 30.30 | 27.41 |
| 0.170  | -157.26096 | 0.11525 | -157.14571 | 30.29 | 27.40 |
| 0.180  | -157.26097 | 0.11524 | -157.14573 | 30.28 | 27.38 |
| 0.190  | -157.26099 | 0.11523 | -157.14575 | 30.27 | 27.37 |

|       |            |         |            |       |       |
|-------|------------|---------|------------|-------|-------|
| 0.200 | -157.26101 | 0.11523 | -157.14578 | 30.26 | 27.35 |
| 0.210 | -157.26102 | 0.11522 | -157.14580 | 30.25 | 27.34 |
| 0.220 | -157.26104 | 0.11521 | -157.14583 | 30.24 | 27.32 |
| 0.230 | -157.26106 | 0.11521 | -157.14586 | 30.22 | 27.31 |
| 0.240 | -157.26108 | 0.11520 | -157.14588 | 30.21 | 27.29 |
| 0.250 | -157.26110 | 0.11519 | -157.14591 | 30.20 | 27.27 |
| 0.260 | -157.26112 | 0.11518 | -157.14594 | 30.19 | 27.25 |
| 0.270 | -157.26114 | 0.11518 | -157.14597 | 30.17 | 27.24 |
| 0.280 | -157.26117 | 0.11517 | -157.14600 | 30.16 | 27.22 |
| 0.290 | -157.26119 | 0.11516 | -157.14603 | 30.14 | 27.20 |
| 0.300 | -157.26121 | 0.11515 | -157.14606 | 30.13 | 27.18 |
| 0.310 | -157.26124 | 0.11515 | -157.14609 | 30.11 | 27.16 |
| 0.320 | -157.26126 | 0.11514 | -157.14612 | 30.10 | 27.14 |
| 0.330 | -157.26128 | 0.11513 | -157.14615 | 30.08 | 27.12 |
| 0.340 | -157.26131 | 0.11513 | -157.14618 | 30.07 | 27.10 |
| 0.350 | -157.26134 | 0.11512 | -157.14622 | 30.05 | 27.08 |
| 0.360 | -157.26136 | 0.11511 | -157.14625 | 30.04 | 27.06 |
| 0.370 | -157.26139 | 0.11511 | -157.14628 | 30.02 | 27.04 |
| 0.380 | -157.26142 | 0.11510 | -157.14632 | 30.00 | 27.02 |
| 0.390 | -157.26144 | 0.11509 | -157.14635 | 29.99 | 27.00 |
| 0.400 | -157.26147 | 0.11508 | -157.14639 | 29.97 | 26.97 |
| 0.410 | -157.26150 | 0.11508 | -157.14642 | 29.95 | 26.95 |
| 0.420 | -157.26153 | 0.11507 | -157.14646 | 29.93 | 26.93 |
| 0.430 | -157.26156 | 0.11506 | -157.14649 | 29.91 | 26.91 |
| 0.440 | -157.26159 | 0.11505 | -157.14653 | 29.90 | 26.88 |
| 0.450 | -157.26162 | 0.11505 | -157.14657 | 29.88 | 26.86 |
| 0.460 | -157.26165 | 0.11504 | -157.14661 | 29.86 | 26.84 |
| 0.470 | -157.26168 | 0.11503 | -157.14664 | 29.84 | 26.81 |
| 0.480 | -157.26171 | 0.11502 | -157.14668 | 29.82 | 26.79 |
| 0.490 | -157.26174 | 0.11502 | -157.14672 | 29.80 | 26.76 |
| 0.500 | -157.26177 | 0.11501 | -157.14676 | 29.78 | 26.74 |
| 0.510 | -157.26180 | 0.11500 | -157.14680 | 29.76 | 26.72 |
| 0.520 | -157.26183 | 0.11499 | -157.14684 | 29.74 | 26.69 |
| 0.530 | -157.26186 | 0.11499 | -157.14688 | 29.72 | 26.67 |
| 0.540 | -157.26190 | 0.11498 | -157.14692 | 29.70 | 26.64 |
| 0.550 | -157.26193 | 0.11497 | -157.14696 | 29.68 | 26.62 |
| 0.560 | -157.26196 | 0.11497 | -157.14700 | 29.66 | 26.59 |
| 0.570 | -157.26200 | 0.11496 | -157.14704 | 29.64 | 26.56 |
| 0.580 | -157.26203 | 0.11495 | -157.14708 | 29.62 | 26.54 |
| 0.590 | -157.26206 | 0.11494 | -157.14712 | 29.59 | 26.51 |
| 0.600 | -157.26210 | 0.11493 | -157.14716 | 29.57 | 26.49 |
| 0.610 | -157.26213 | 0.11493 | -157.14720 | 29.55 | 26.46 |
| 0.620 | -157.26217 | 0.11492 | -157.14725 | 29.53 | 26.43 |
| 0.630 | -157.26220 | 0.11491 | -157.14729 | 29.51 | 26.41 |
| 0.640 | -157.26224 | 0.11490 | -157.14733 | 29.49 | 26.38 |
| 0.650 | -157.26227 | 0.11490 | -157.14737 | 29.46 | 26.35 |



|       |              |         |            |       |       |
|-------|--------------|---------|------------|-------|-------|
| 0.660 | -157.2623076 | 0.11489 | -157.14742 | 29.44 | 26.33 |
| 0.670 | -157.2623429 | 0.11488 | -157.14746 | 29.42 | 26.30 |
| 0.680 | -157.2623784 | 0.11488 | -157.14750 | 29.40 | 26.27 |
| 0.690 | -157.2624148 | 0.11487 | -157.14755 | 29.37 | 26.25 |
| 0.700 | -157.2624505 | 0.11486 | -157.14759 | 29.35 | 26.22 |
| 0.710 | -157.262487  | 0.11485 | -157.14764 | 29.33 | 26.19 |
| 0.720 | -157.2625229 | 0.11485 | -157.14768 | 29.31 | 26.16 |
| 0.730 | -157.2625601 | 0.11484 | -157.14772 | 29.28 | 26.14 |
| 0.740 | -157.2625964 | 0.11483 | -157.14777 | 29.26 | 26.11 |
| 0.750 | -157.2626337 | 0.11482 | -157.14781 | 29.24 | 26.08 |
| 0.760 | -157.2626703 | 0.11481 | -157.14786 | 29.21 | 26.05 |
| 0.770 | -157.2627078 | 0.11481 | -157.14790 | 29.19 | 26.02 |
| 0.780 | -157.2627446 | 0.11480 | -157.14795 | 29.17 | 26.00 |
| 0.790 | -157.2627821 | 0.11479 | -157.14799 | 29.14 | 25.97 |
| 0.800 | -157.2628196 | 0.11478 | -157.14804 | 29.12 | 25.94 |
| 0.810 | -157.2628572 | 0.11478 | -157.14808 | 29.10 | 25.91 |
| 0.820 | -157.2628948 | 0.11477 | -157.14813 | 29.07 | 25.88 |
| 0.830 | -157.2629323 | 0.11476 | -157.14817 | 29.05 | 25.85 |
| 0.840 | -157.2629702 | 0.11475 | -157.14822 | 29.03 | 25.82 |
| 0.850 | -157.2630078 | 0.11475 | -157.14826 | 29.00 | 25.80 |
| 0.860 | -157.2630463 | 0.11474 | -157.14831 | 28.98 | 25.77 |
| 0.870 | -157.2630841 | 0.11473 | -157.14835 | 28.95 | 25.74 |
| 0.880 | -157.2631227 | 0.11472 | -157.14840 | 28.93 | 25.71 |
| 0.890 | -157.2631607 | 0.11471 | -157.14845 | 28.91 | 25.68 |
| 0.900 | -157.2631992 | 0.11471 | -157.14849 | 28.88 | 25.65 |
| 0.910 | -157.2632372 | 0.11470 | -157.14854 | 28.86 | 25.62 |
| 0.920 | -157.2632753 | 0.11469 | -157.14858 | 28.83 | 25.59 |
| 0.930 | -157.263314  | 0.11468 | -157.14863 | 28.81 | 25.57 |
| 0.940 | -157.2633524 | 0.11468 | -157.14868 | 28.79 | 25.54 |
| 0.950 | -157.263391  | 0.11467 | -157.14872 | 28.76 | 25.51 |
| 0.960 | -157.2634292 | 0.11466 | -157.14877 | 28.74 | 25.48 |
| 0.970 | -157.2634679 | 0.11465 | -157.14882 | 28.71 | 25.45 |
| 0.980 | -157.2635066 | 0.11464 | -157.14886 | 28.69 | 25.42 |
| 0.990 | -157.2635452 | 0.11464 | -157.14891 | 28.67 | 25.39 |
| 1.000 | -157.2635843 | 0.11463 | -157.14896 | 28.64 | 25.36 |
| 1.010 | -157.263623  | 0.11462 | -157.14900 | 28.62 | 25.33 |
| 1.020 | -157.2636617 | 0.11461 | -157.14905 | 28.59 | 25.30 |
| 1.030 | -157.2637004 | 0.11460 | -157.14910 | 28.57 | 25.27 |
| 1.040 | -157.2637389 | 0.11460 | -157.14914 | 28.54 | 25.24 |
| 1.050 | -157.2637776 | 0.11459 | -157.14919 | 28.52 | 25.22 |
| 1.060 | -157.2638162 | 0.11458 | -157.14923 | 28.50 | 25.19 |
| 1.070 | -157.2638558 | 0.11457 | -157.14928 | 28.47 | 25.16 |
| 1.080 | -157.2638941 | 0.11457 | -157.14933 | 28.45 | 25.13 |
| 1.090 | -157.2639331 | 0.11456 | -157.14937 | 28.42 | 25.10 |
| 1.100 | -157.2639713 | 0.11455 | -157.14942 | 28.40 | 25.07 |
| 1.110 | -157.2640104 | 0.11454 | -157.14947 | 28.37 | 25.04 |

|       |              |         |            |       |       |
|-------|--------------|---------|------------|-------|-------|
| 1.120 | -157.2640495 | 0.11454 | -157.14951 | 28.35 | 25.01 |
| 1.130 | -157.2640879 | 0.11453 | -157.14956 | 28.33 | 24.98 |
| 1.140 | -157.2641265 | 0.11452 | -157.14961 | 28.30 | 24.95 |
| 1.150 | -157.2641656 | 0.11451 | -157.14965 | 28.28 | 24.92 |
| 1.160 | -157.2642043 | 0.11450 | -157.14970 | 28.25 | 24.89 |
| 1.170 | -157.2642423 | 0.11450 | -157.14975 | 28.23 | 24.87 |
| 1.180 | -157.264281  | 0.11449 | -157.14979 | 28.20 | 24.84 |
| 1.190 | -157.2643196 | 0.11448 | -157.14984 | 28.18 | 24.81 |
| 1.200 | -157.264358  | 0.11447 | -157.14988 | 28.16 | 24.78 |
| 1.210 | -157.2643966 | 0.11446 | -157.14993 | 28.13 | 24.75 |
| 1.220 | -157.2644351 | 0.11446 | -157.14998 | 28.11 | 24.72 |
| 1.230 | -157.264474  | 0.11445 | -157.15002 | 28.08 | 24.69 |
| 1.240 | -157.2645117 | 0.11444 | -157.15007 | 28.06 | 24.66 |
| 1.250 | -157.2645503 | 0.11443 | -157.15012 | 28.03 | 24.63 |
| 1.260 | -157.264589  | 0.11443 | -157.15016 | 28.01 | 24.60 |
| 1.270 | -157.2646269 | 0.11442 | -157.15021 | 27.99 | 24.58 |
| 1.280 | -157.2646651 | 0.11441 | -157.15026 | 27.96 | 24.55 |
| 1.290 | -157.2647034 | 0.11440 | -157.15030 | 27.94 | 24.52 |
| 1.300 | -157.2647415 | 0.11439 | -157.15035 | 27.91 | 24.49 |
| 1.310 | -157.2647794 | 0.11439 | -157.15039 | 27.89 | 24.46 |
| 1.320 | -157.2648174 | 0.11438 | -157.15044 | 27.87 | 24.43 |
| 1.330 | -157.2648555 | 0.11437 | -157.15048 | 27.84 | 24.40 |
| 1.340 | -157.2648929 | 0.11436 | -157.15053 | 27.82 | 24.37 |
| 1.350 | -157.2649308 | 0.11436 | -157.15058 | 27.80 | 24.34 |
| 1.360 | -157.2649687 | 0.11435 | -157.15062 | 27.77 | 24.32 |
| 1.370 | -157.2650057 | 0.11434 | -157.15067 | 27.75 | 24.29 |
| 1.380 | -157.2650437 | 0.11433 | -157.15071 | 27.73 | 24.26 |
| 1.390 | -157.2650819 | 0.11433 | -157.15076 | 27.70 | 24.23 |
| 1.400 | -157.2651192 | 0.11432 | -157.15080 | 27.68 | 24.20 |
| 1.410 | -157.2651562 | 0.11431 | -157.15085 | 27.65 | 24.18 |
| 1.420 | -157.2651937 | 0.11430 | -157.15089 | 27.63 | 24.15 |
| 1.430 | -157.2652307 | 0.11429 | -157.15094 | 27.61 | 24.12 |
| 1.440 | -157.265268  | 0.11429 | -157.15098 | 27.58 | 24.09 |
| 1.450 | -157.2653051 | 0.11428 | -157.15103 | 27.56 | 24.06 |
| 1.460 | -157.2653424 | 0.11427 | -157.15107 | 27.54 | 24.03 |
| 1.470 | -157.265379  | 0.11426 | -157.15112 | 27.51 | 24.01 |
| 1.480 | -157.2654158 | 0.11426 | -157.15116 | 27.49 | 23.98 |
| 1.490 | -157.2654526 | 0.11425 | -157.15120 | 27.47 | 23.95 |
| 1.500 | -157.2654892 | 0.11424 | -157.15125 | 27.45 | 23.92 |
| 1.510 | -157.2655258 | 0.11423 | -157.15129 | 27.42 | 23.89 |
| 1.520 | -157.2655623 | 0.11423 | -157.15134 | 27.40 | 23.87 |
| 1.530 | -157.2655988 | 0.11422 | -157.15138 | 27.38 | 23.84 |
| 1.540 | -157.265635  | 0.11421 | -157.15143 | 27.35 | 23.81 |
| 1.550 | -157.2656712 | 0.11420 | -157.15147 | 27.33 | 23.78 |
| 1.560 | -157.2657077 | 0.11419 | -157.15151 | 27.31 | 23.76 |
| 1.570 | -157.2657436 | 0.11419 | -157.15156 | 27.29 | 23.73 |

|       |              |         |            |       |       |
|-------|--------------|---------|------------|-------|-------|
| 1.580 | -157.2657796 | 0.11418 | -157.15160 | 27.26 | 23.70 |
| 1.590 | -157.2658157 | 0.11417 | -157.15164 | 27.24 | 23.67 |
| 1.600 | -157.2658511 | 0.11416 | -157.15169 | 27.22 | 23.65 |
| 1.610 | -157.2658869 | 0.11416 | -157.15173 | 27.20 | 23.62 |
| 1.620 | -157.2659226 | 0.11415 | -157.15177 | 27.17 | 23.59 |
| 1.630 | -157.2659578 | 0.11414 | -157.15182 | 27.15 | 23.57 |
| 1.640 | -157.2659936 | 0.11414 | -157.15186 | 27.13 | 23.54 |
| 1.650 | -157.2660289 | 0.11413 | -157.15190 | 27.11 | 23.51 |
| 1.660 | -157.2660636 | 0.11412 | -157.15194 | 27.09 | 23.49 |
| 1.670 | -157.2660988 | 0.11411 | -157.15199 | 27.06 | 23.46 |
| 1.680 | -157.266134  | 0.11410 | -157.15203 | 27.04 | 23.43 |
| 1.690 | -157.266169  | 0.11410 | -157.15207 | 27.02 | 23.41 |
| 1.700 | -157.2662035 | 0.11409 | -157.15211 | 27.00 | 23.38 |
| 1.710 | -157.2662386 | 0.11408 | -157.15215 | 26.98 | 23.35 |
| 1.720 | -157.2662728 | 0.11408 | -157.15220 | 26.95 | 23.33 |
| 1.730 | -157.2663076 | 0.11407 | -157.15224 | 26.93 | 23.30 |
| 1.740 | -157.2663419 | 0.11406 | -157.15228 | 26.91 | 23.28 |
| 1.750 | -157.2663761 | 0.11405 | -157.15232 | 26.89 | 23.25 |
| 1.760 | -157.2664101 | 0.11405 | -157.15236 | 26.87 | 23.22 |
| 1.770 | -157.2664444 | 0.11404 | -157.15240 | 26.85 | 23.20 |
| 1.780 | -157.2664781 | 0.11403 | -157.15244 | 26.83 | 23.17 |
| 1.790 | -157.2665122 | 0.11403 | -157.15249 | 26.80 | 23.15 |
| 1.800 | -157.2665459 | 0.11402 | -157.15253 | 26.78 | 23.12 |
| 1.810 | -157.2665797 | 0.11401 | -157.15257 | 26.76 | 23.10 |
| 1.820 | -157.2666129 | 0.11401 | -157.15261 | 26.74 | 23.07 |
| 1.830 | -157.2666459 | 0.11400 | -157.15265 | 26.72 | 23.04 |
| 1.840 | -157.2666797 | 0.11399 | -157.15269 | 26.70 | 23.02 |
| 1.850 | -157.2667126 | 0.11398 | -157.15273 | 26.68 | 22.99 |
| 1.860 | -157.2667455 | 0.11398 | -157.15277 | 26.66 | 22.97 |
| 1.870 | -157.2667787 | 0.11397 | -157.15281 | 26.64 | 22.94 |
| 1.880 | -157.2668114 | 0.11396 | -157.15285 | 26.62 | 22.92 |
| 1.890 | -157.2668443 | 0.11396 | -157.15289 | 26.60 | 22.89 |
| 1.900 | -157.2668769 | 0.11395 | -157.15293 | 26.57 | 22.87 |
| 1.910 | -157.2669095 | 0.11394 | -157.15297 | 26.55 | 22.84 |
| 1.920 | -157.2669415 | 0.11394 | -157.15301 | 26.53 | 22.82 |
| 1.930 | -157.2669739 | 0.11393 | -157.15304 | 26.51 | 22.80 |
| 1.940 | -157.2670062 | 0.11392 | -157.15308 | 26.49 | 22.77 |
| 1.950 | -157.267038  | 0.11392 | -157.15312 | 26.47 | 22.75 |

**SI Table 37:** Potential energy data along the MEP for reaction  $C\cdot C(C)C \rightarrow C\cdot + C=CC$ . All data calculated with GAUSSIAN 03 program at the CCSD(T)/cc-pVDZ//BH&HLYP/cc-pVDZ level of theory.

| <b>Reaction <math>C\cdot C(C)C \rightarrow C\cdot + C=CC</math></b>            |                 |                  |                    |                               |                                  |
|--------------------------------------------------------------------------------|-----------------|------------------|--------------------|-------------------------------|----------------------------------|
| $E_{C\cdot C(C)C} = -157.683173$ hartree $ZPE_{CC\cdot CC} = 0.119552$ hartree |                 |                  |                    |                               |                                  |
| Reaction coordinate<br>(amu <sup>1/2</sup><br>bohr)                            | $V_C$ (Hartree) | ZPE<br>(Hartree) | $V_{ag}$ (Hartree) | $V_C - E_{CCC}$<br>(kcal/mol) | $V_{ag} - E_{CCC}$<br>(kcal/mol) |
| -5.840                                                                         | -157.63967      | 0.11289          | -157.52679         | 27.296556                     | 23.11                            |
| -5.810                                                                         | -157.63964      | 0.11289          | -157.52675         | 27.31626                      | 23.14                            |
| -5.780                                                                         | -157.63961      | 0.11290          | -157.52671         | 27.336293                     | 23.16                            |
| -5.750                                                                         | -157.63958      | 0.11290          | -157.52668         | 27.356625                     | 23.18                            |
| -5.720                                                                         | -157.63954      | 0.11290          | -157.52664         | 27.377253                     | 23.20                            |
| -5.690                                                                         | -157.63951      | 0.11290          | -157.52661         | 27.398214                     | 23.23                            |
| -5.660                                                                         | -157.63948      | 0.11289          | -157.52659         | 27.419491                     | 23.24                            |
| -5.630                                                                         | -157.63944      | 0.11287          | -157.52657         | 27.441024                     | 23.25                            |
| -5.601                                                                         | -157.63941      | 0.11285          | -157.52656         | 27.462738                     | 23.26                            |
| -5.571                                                                         | -157.63937      | 0.11294          | -157.52644         | 27.484824                     | 23.33                            |
| -5.541                                                                         | -157.63934      | 0.11294          | -157.52640         | 27.507495                     | 23.36                            |
| -5.511                                                                         | -157.63930      | 0.11295          | -157.52636         | 27.530554                     | 23.38                            |
| -5.481                                                                         | -157.63926      | 0.11295          | -157.52632         | 27.553944                     | 23.41                            |
| -5.451                                                                         | -157.63923      | 0.11295          | -157.52627         | 27.577667                     | 23.44                            |
| -5.421                                                                         | -157.63919      | 0.11295          | -157.52624         | 27.601757                     | 23.46                            |
| -5.391                                                                         | -157.63915      | 0.11295          | -157.52620         | 27.626189                     | 23.48                            |
| -5.361                                                                         | -157.63911      | 0.11299          | -157.52612         | 27.650995                     | 23.53                            |
| -5.331                                                                         | -157.63907      | 0.11300          | -157.52607         | 27.676253                     | 23.56                            |
| -5.301                                                                         | -157.63903      | 0.11300          | -157.52603         | 27.701893                     | 23.59                            |
| -5.271                                                                         | -157.63899      | 0.11302          | -157.52597         | 27.727942                     | 23.63                            |
| -5.241                                                                         | -157.63894      | 0.11302          | -157.52592         | 27.754343                     | 23.66                            |
| -5.211                                                                         | -157.63890      | 0.11302          | -157.52589         | 27.781157                     | 23.68                            |
| -5.181                                                                         | -157.63886      | 0.11304          | -157.52582         | 27.808311                     | 23.72                            |
| -5.151                                                                         | -157.63881      | 0.11305          | -157.52576         | 27.835872                     | 23.76                            |
| -5.121                                                                         | -157.63877      | 0.11306          | -157.52571         | 27.863914                     | 23.79                            |
| -5.091                                                                         | -157.63872      | 0.11308          | -157.52565         | 27.892372                     | 23.83                            |
| -5.061                                                                         | -157.63868      | 0.11309          | -157.52559         | 27.921269                     | 23.87                            |
| -5.031                                                                         | -157.63863      | 0.11310          | -157.52553         | 27.950588                     | 23.90                            |
| -5.001                                                                         | -157.63858      | 0.11311          | -157.52548         | 27.980351                     | 23.94                            |
| -4.971                                                                         | -157.63854      | 0.11312          | -157.52542         | 28.010601                     | 23.97                            |
| -4.941                                                                         | -157.63849      | 0.11313          | -157.52536         | 28.041192                     | 24.01                            |

|        |            |         |            |           |       |
|--------|------------|---------|------------|-----------|-------|
| -4.911 | -157.63844 | 0.11314 | -157.52530 | 28.072277 | 24.05 |
| -4.881 | -157.63839 | 0.11315 | -157.52524 | 28.103822 | 24.09 |
| -4.851 | -157.63834 | 0.11316 | -157.52518 | 28.135755 | 24.12 |
| -4.821 | -157.63828 | 0.11316 | -157.52513 | 28.168158 | 24.16 |
| -4.791 | -157.63823 | 0.11317 | -157.52506 | 28.200988 | 24.20 |
| -4.761 | -157.63818 | 0.11319 | -157.52499 | 28.234208 | 24.24 |
| -4.731 | -157.63813 | 0.11321 | -157.52492 | 28.268032 | 24.29 |
| -4.701 | -157.63807 | 0.11321 | -157.52486 | 28.302327 | 24.32 |
| -4.671 | -157.63802 | 0.11322 | -157.52479 | 28.337032 | 24.37 |
| -4.641 | -157.63796 | 0.11324 | -157.52472 | 28.372192 | 24.41 |
| -4.611 | -157.63790 | 0.11325 | -157.52465 | 28.407891 | 24.45 |
| -4.581 | -157.63784 | 0.11326 | -157.52459 | 28.444069 | 24.50 |
| -4.551 | -157.63779 | 0.11327 | -157.52452 | 28.480661 | 24.54 |
| -4.521 | -157.63773 | 0.11326 | -157.52446 | 28.517729 | 24.57 |
| -4.491 | -157.63767 | 0.11328 | -157.52439 | 28.555164 | 24.62 |
| -4.462 | -157.63761 | 0.11329 | -157.52431 | 28.593165 | 24.67 |
| -4.432 | -157.63755 | 0.11331 | -157.52424 | 28.631631 | 24.71 |
| -4.402 | -157.63748 | 0.11332 | -157.52416 | 28.670656 | 24.76 |
| -4.372 | -157.63742 | 0.11333 | -157.52409 | 28.710152 | 24.81 |
| -4.342 | -157.63736 | 0.11334 | -157.52401 | 28.75013  | 24.85 |
| -4.312 | -157.63729 | 0.11336 | -157.52394 | 28.790651 | 24.90 |
| -4.282 | -157.63723 | 0.11337 | -157.52386 | 28.831653 | 24.95 |
| -4.252 | -157.63716 | 0.11338 | -157.52378 | 28.873125 | 25.00 |
| -4.222 | -157.63709 | 0.11339 | -157.52371 | 28.91515  | 25.05 |
| -4.192 | -157.63703 | 0.11340 | -157.52363 | 28.957642 | 25.10 |
| -4.162 | -157.63696 | 0.11341 | -157.52355 | 29.000612 | 25.14 |
| -4.132 | -157.63689 | 0.11342 | -157.52347 | 29.044125 | 25.20 |
| -4.102 | -157.63682 | 0.11343 | -157.52339 | 29.088111 | 25.25 |
| -4.072 | -157.63675 | 0.11344 | -157.52331 | 29.132638 | 25.30 |
| -4.042 | -157.63668 | 0.11345 | -157.52323 | 29.177635 | 25.35 |
| -4.012 | -157.63660 | 0.11346 | -157.52314 | 29.223171 | 25.40 |
| -3.982 | -157.63653 | 0.11347 | -157.52306 | 29.269168 | 25.45 |
| -3.952 | -157.63646 | 0.11348 | -157.52298 | 29.315626 | 25.50 |
| -3.922 | -157.63638 | 0.11349 | -157.52289 | 29.362622 | 25.56 |
| -3.892 | -157.63631 | 0.11350 | -157.52281 | 29.410155 | 25.61 |
| -3.862 | -157.63623 | 0.11351 | -157.52272 | 29.458142 | 25.67 |
| -3.832 | -157.63615 | 0.11352 | -157.52263 | 29.506665 | 25.72 |
| -3.802 | -157.63607 | 0.11353 | -157.52255 | 29.555717 | 25.77 |
| -3.772 | -157.63599 | 0.11354 | -157.52246 | 29.605214 | 25.83 |
| -3.742 | -157.63591 | 0.11355 | -157.52237 | 29.655246 | 25.89 |
| -3.712 | -157.63583 | 0.11355 | -157.52228 | 29.705801 | 25.94 |
| -3.682 | -157.63575 | 0.11357 | -157.52219 | 29.756798 | 26.00 |
| -3.652 | -157.63567 | 0.11357 | -157.52210 | 29.808321 | 26.05 |
| -3.622 | -157.63559 | 0.11359 | -157.52200 | 29.860304 | 26.12 |
| -3.592 | -157.63550 | 0.11360 | -157.52191 | 29.912972 | 26.18 |
| -3.562 | -157.63542 | 0.11361 | -157.52181 | 29.965982 | 26.24 |

|        |            |         |            |           |       |
|--------|------------|---------|------------|-----------|-------|
| -3.532 | -157.63533 | 0.11362 | -157.52172 | 30.019603 | 26.29 |
| -3.502 | -157.63525 | 0.11363 | -157.52162 | 30.073743 | 26.36 |
| -3.472 | -157.63516 | 0.11364 | -157.52153 | 30.128407 | 26.42 |
| -3.442 | -157.63507 | 0.11365 | -157.52143 | 30.183493 | 26.48 |
| -3.412 | -157.63498 | 0.11365 | -157.52133 | 30.239097 | 26.54 |
| -3.382 | -157.63489 | 0.11366 | -157.52123 | 30.295318 | 26.60 |
| -3.352 | -157.63480 | 0.11368 | -157.52113 | 30.35191  | 26.66 |
| -3.322 | -157.63471 | 0.11369 | -157.52103 | 30.409168 | 26.73 |
| -3.292 | -157.63462 | 0.11370 | -157.52093 | 30.466844 | 26.79 |
| -3.262 | -157.63453 | 0.11371 | -157.52082 | 30.52513  | 26.86 |
| -3.232 | -157.63443 | 0.11372 | -157.52072 | 30.583831 | 26.92 |
| -3.202 | -157.63434 | 0.11373 | -157.52061 | 30.643142 | 26.99 |
| -3.172 | -157.63424 | 0.11373 | -157.52051 | 30.702973 | 27.05 |
| -3.142 | -157.63415 | 0.11375 | -157.52040 | 30.763262 | 27.12 |
| -3.112 | -157.63405 | 0.11376 | -157.52030 | 30.824111 | 27.19 |
| -3.082 | -157.63395 | 0.11377 | -157.52019 | 30.885464 | 27.25 |
| -3.052 | -157.63386 | 0.11377 | -157.52008 | 30.947331 | 27.32 |
| -3.022 | -157.63376 | 0.11379 | -157.51997 | 31.009685 | 27.39 |
| -2.992 | -157.63366 | 0.11379 | -157.51987 | 31.072668 | 27.46 |
| -2.962 | -157.63355 | 0.11381 | -157.51975 | 31.136099 | 27.53 |
| -2.932 | -157.63345 | 0.11381 | -157.51964 | 31.200079 | 27.60 |
| -2.902 | -157.63335 | 0.11383 | -157.51952 | 31.264547 | 27.67 |
| -2.872 | -157.63325 | 0.11383 | -157.51941 | 31.329515 | 27.74 |
| -2.842 | -157.63314 | 0.11385 | -157.51930 | 31.395048 | 27.81 |
| -2.812 | -157.63304 | 0.11385 | -157.51918 | 31.461113 | 27.89 |
| -2.782 | -157.63293 | 0.11387 | -157.51907 | 31.527658 | 27.96 |
| -2.752 | -157.63282 | 0.11387 | -157.51895 | 31.594689 | 28.03 |
| -2.722 | -157.63272 | 0.11389 | -157.51883 | 31.662308 | 28.11 |
| -2.692 | -157.63261 | 0.11390 | -157.51871 | 31.730378 | 28.18 |
| -2.662 | -157.63250 | 0.11391 | -157.51859 | 31.798962 | 28.26 |
| -2.632 | -157.63239 | 0.11392 | -157.51847 | 31.868125 | 28.33 |
| -2.602 | -157.63228 | 0.11393 | -157.51835 | 31.937625 | 28.41 |
| -2.572 | -157.63217 | 0.11394 | -157.51823 | 32.007688 | 28.49 |
| -2.542 | -157.63205 | 0.11395 | -157.51810 | 32.078367 | 28.56 |
| -2.512 | -157.63194 | 0.11396 | -157.51798 | 32.149362 | 28.64 |
| -2.482 | -157.63183 | 0.11397 | -157.51785 | 32.220933 | 28.72 |
| -2.452 | -157.63171 | 0.11399 | -157.51772 | 32.293047 | 28.80 |
| -2.422 | -157.63160 | 0.11400 | -157.51760 | 32.365498 | 28.88 |
| -2.392 | -157.63148 | 0.11401 | -157.51747 | 32.438511 | 28.96 |
| -2.362 | -157.63136 | 0.11402 | -157.51734 | 32.511911 | 29.04 |
| -2.332 | -157.63124 | 0.11404 | -157.51721 | 32.5859   | 29.13 |
| -2.302 | -157.63113 | 0.11405 | -157.51708 | 32.66016  | 29.21 |
| -2.272 | -157.63101 | 0.11406 | -157.51695 | 32.73497  | 29.29 |
| -2.242 | -157.63089 | 0.11408 | -157.51681 | 32.810257 | 29.37 |
| -2.212 | -157.63077 | 0.11409 | -157.51668 | 32.885853 | 29.46 |
| -2.182 | -157.63064 | 0.11410 | -157.51654 | 32.961951 | 29.54 |

|        |            |         |            |           |       |
|--------|------------|---------|------------|-----------|-------|
| -2.152 | -157.63052 | 0.11411 | -157.51641 | 33.038527 | 29.63 |
| -2.122 | -157.63040 | 0.11413 | -157.51627 | 33.115368 | 29.71 |
| -2.092 | -157.63028 | 0.11414 | -157.51614 | 33.192547 | 29.80 |
| -2.062 | -157.63015 | 0.11415 | -157.51600 | 33.270208 | 29.88 |
| -2.032 | -157.63003 | 0.11416 | -157.51587 | 33.348153 | 29.96 |
| -2.002 | -157.62990 | 0.11416 | -157.51574 | 33.426461 | 30.04 |
| -1.972 | -157.62978 | 0.11417 | -157.51561 | 33.505203 | 30.13 |
| -1.942 | -157.62965 | 0.11419 | -157.51546 | 33.584036 | 30.22 |
| -1.912 | -157.62953 | 0.11421 | -157.51531 | 33.663345 | 30.31 |
| -1.882 | -157.62940 | 0.11423 | -157.51517 | 33.742891 | 30.40 |
| -1.852 | -157.62927 | 0.11425 | -157.51502 | 33.822624 | 30.50 |
| -1.822 | -157.62915 | 0.11427 | -157.51487 | 33.902492 | 30.59 |
| -1.792 | -157.62902 | 0.11429 | -157.51473 | 33.982708 | 30.68 |
| -1.762 | -157.62889 | 0.11431 | -157.51458 | 34.063017 | 30.78 |
| -1.732 | -157.62876 | 0.11433 | -157.51443 | 34.143409 | 30.87 |
| -1.702 | -157.62863 | 0.11435 | -157.51428 | 34.224059 | 30.96 |
| -1.672 | -157.62851 | 0.11437 | -157.51413 | 34.304603 | 31.05 |
| -1.642 | -157.62838 | 0.11439 | -157.51399 | 34.385301 | 31.15 |
| -1.612 | -157.62825 | 0.11441 | -157.51384 | 34.466049 | 31.24 |
| -1.582 | -157.62812 | 0.11443 | -157.51369 | 34.546703 | 31.33 |
| -1.552 | -157.62799 | 0.11445 | -157.51354 | 34.627168 | 31.42 |
| -1.522 | -157.62786 | 0.11447 | -157.51340 | 34.707582 | 31.52 |
| -1.492 | -157.62774 | 0.11449 | -157.51325 | 34.787942 | 31.61 |
| -1.462 | -157.62761 | 0.11450 | -157.51310 | 34.867874 | 31.70 |
| -1.432 | -157.62748 | 0.11452 | -157.51296 | 34.947646 | 31.79 |
| -1.402 | -157.62735 | 0.11454 | -157.51281 | 35.027085 | 31.88 |
| -1.372 | -157.62723 | 0.11456 | -157.51267 | 35.106164 | 31.97 |
| -1.342 | -157.62710 | 0.11457 | -157.51253 | 35.184831 | 32.06 |
| -1.312 | -157.62698 | 0.11459 | -157.51239 | 35.26288  | 32.15 |
| -1.282 | -157.62685 | 0.11461 | -157.51225 | 35.340473 | 32.24 |
| -1.252 | -157.62673 | 0.11462 | -157.51211 | 35.417399 | 32.32 |
| -1.222 | -157.62661 | 0.11464 | -157.51198 | 35.493639 | 32.41 |
| -1.192 | -157.62649 | 0.11465 | -157.51184 | 35.56904  | 32.49 |
| -1.162 | -157.62637 | 0.11467 | -157.51171 | 35.64376  | 32.58 |
| -1.132 | -157.62625 | 0.11468 | -157.51157 | 35.717436 | 32.66 |
| -1.102 | -157.62614 | 0.11469 | -157.51144 | 35.790245 | 32.74 |
| -1.072 | -157.62602 | 0.11471 | -157.51132 | 35.862015 | 32.82 |
| -1.042 | -157.62591 | 0.11472 | -157.51119 | 35.932569 | 32.90 |
| -1.012 | -157.62580 | 0.11473 | -157.51107 | 36.002128 | 32.98 |
| -0.982 | -157.62569 | 0.11474 | -157.51095 | 36.070272 | 33.05 |
| -0.952 | -157.62558 | 0.11476 | -157.51083 | 36.137322 | 33.13 |
| -0.922 | -157.62548 | 0.11477 | -157.51071 | 36.203014 | 33.20 |
| -0.892 | -157.62538 | 0.11478 | -157.51060 | 36.267302 | 33.27 |
| -0.862 | -157.62528 | 0.11479 | -157.51049 | 36.330275 | 33.34 |
| -0.832 | -157.62518 | 0.11479 | -157.51039 | 36.391844 | 33.41 |
| -0.802 | -157.62508 | 0.11481 | -157.51028 | 36.45203  | 33.47 |

|        |            |         |            |           |       |
|--------|------------|---------|------------|-----------|-------|
| -0.772 | -157.62499 | 0.11482 | -157.51017 | 36.510932 | 33.54 |
| -0.742 | -157.62490 | 0.11483 | -157.51007 | 36.568562 | 33.60 |
| -0.712 | -157.62481 | 0.11484 | -157.50997 | 36.624993 | 33.67 |
| -0.682 | -157.62472 | 0.11484 | -157.50988 | 36.680409 | 33.72 |
| -0.652 | -157.62463 | 0.11484 | -157.50979 | 36.734872 | 33.78 |
| -0.622 | -157.62455 | 0.11486 | -157.50969 | 36.788732 | 33.84 |
| -0.592 | -157.62446 | 0.11486 | -157.50960 | 36.841992 | 33.90 |
| -0.562 | -157.62438 | 0.11486 | -157.50952 | 36.895097 | 33.95 |
| -0.532 | -157.62429 | 0.11487 | -157.50943 | 36.948207 | 34.01 |
| -0.502 | -157.62421 | 0.11486 | -157.50935 | 37.001657 | 34.06 |
| -0.472 | -157.62412 | 0.11486 | -157.50926 | 37.055808 | 34.11 |
| -0.442 | -157.62403 | 0.11485 | -157.50919 | 37.110949 | 34.16 |
| -0.412 | -157.62394 | 0.11483 | -157.50911 | 37.167408 | 34.21 |
| -0.382 | -157.62385 | 0.11481 | -157.50904 | 37.22551  | 34.25 |
| -0.352 | -157.62375 | 0.11477 | -157.50899 | 37.286002 | 34.28 |
| -0.322 | -157.62365 | 0.11471 | -157.50894 | 37.349537 | 34.31 |
| -0.292 | -157.62355 | 0.11464 | -157.50891 | 37.416974 | 34.33 |
| -0.262 | -157.62343 | 0.11453 | -157.50890 | 37.489586 | 34.34 |
| -0.232 | -157.62330 | 0.11439 | -157.50892 | 37.568995 | 34.33 |
| -0.202 | -157.62316 | 0.11420 | -157.50896 | 37.65779  | 34.30 |
| -0.173 | -157.62300 | 0.11398 | -157.50902 | 37.759229 | 34.26 |
| -0.143 | -157.62281 | 0.11373 | -157.50908 | 37.877404 | 34.22 |
| -0.113 | -157.62259 | 0.11331 | -157.50928 | 38.017768 | 34.10 |
| -0.083 | -157.62230 | 0.11200 | -157.51031 | 38.195826 | 33.45 |
| -0.053 | -157.62188 | 0.11053 | -157.51135 | 38.463288 | 32.80 |
| -0.023 | -157.62120 | 0.10959 | -157.51162 | 38.886161 | 32.63 |
| 0.000  | -157.62639 | 0.11543 | -157.51096 | 35.632943 | 33.05 |
| 0.004  | -157.62638 | 0.11554 | -157.51085 | 35.636867 | 33.12 |
| 0.024  | -157.62639 | 0.11555 | -157.51084 | 35.629812 | 33.12 |
| 0.044  | -157.62641 | 0.11549 | -157.51092 | 35.62015  | 33.07 |
| 0.064  | -157.62643 | 0.11556 | -157.51087 | 35.607762 | 33.10 |
| 0.084  | -157.62645 | 0.11560 | -157.51086 | 35.592419 | 33.11 |
| 0.104  | -157.62648 | 0.11563 | -157.51086 | 35.574103 | 33.11 |
| 0.124  | -157.62652 | 0.11564 | -157.51088 | 35.552787 | 33.10 |
| 0.144  | -157.62656 | 0.11566 | -157.51090 | 35.528388 | 33.08 |
| 0.164  | -157.62660 | 0.11567 | -157.51093 | 35.500845 | 33.06 |
| 0.184  | -157.62665 | 0.11568 | -157.51096 | 35.470067 | 33.04 |
| 0.204  | -157.62670 | 0.11570 | -157.51100 | 35.436001 | 33.02 |
| 0.224  | -157.62676 | 0.11571 | -157.51105 | 35.398571 | 32.99 |
| 0.244  | -157.62683 | 0.11573 | -157.51110 | 35.357706 | 32.96 |
| 0.264  | -157.62690 | 0.11574 | -157.51116 | 35.313335 | 32.92 |
| 0.284  | -157.62697 | 0.11575 | -157.51122 | 35.265391 | 32.88 |
| 0.304  | -157.62706 | 0.11577 | -157.51129 | 35.213801 | 32.84 |
| 0.324  | -157.62714 | 0.11578 | -157.51136 | 35.1585   | 32.79 |
| 0.344  | -157.62724 | 0.11579 | -157.51145 | 35.099426 | 32.74 |
| 0.364  | -157.62734 | 0.11581 | -157.51153 | 35.03651  | 32.69 |



|       |            |         |            |           |       |
|-------|------------|---------|------------|-----------|-------|
| 0.384 | -157.62745 | 0.11582 | -157.51163 | 34.969872 | 32.63 |
| 0.404 | -157.62756 | 0.11583 | -157.51173 | 34.899103 | 32.56 |
| 0.424 | -157.62768 | 0.11585 | -157.51183 | 34.824329 | 32.50 |
| 0.444 | -157.62780 | 0.11586 | -157.51195 | 34.745459 | 32.43 |
| 0.464 | -157.62794 | 0.11587 | -157.51207 | 34.662474 | 32.35 |
| 0.484 | -157.62807 | 0.11588 | -157.51219 | 34.5755   | 32.27 |
| 0.504 | -157.62822 | 0.11590 | -157.51232 | 34.484109 | 32.19 |
| 0.524 | -157.62837 | 0.11591 | -157.51246 | 34.388438 | 32.10 |
| 0.544 | -157.62853 | 0.11592 | -157.51261 | 34.288673 | 32.01 |
| 0.564 | -157.62870 | 0.11593 | -157.51277 | 34.184316 | 31.91 |
| 0.584 | -157.62887 | 0.11594 | -157.51293 | 34.075831 | 31.81 |
| 0.604 | -157.62905 | 0.11596 | -157.51310 | 33.962625 | 31.71 |
| 0.624 | -157.62924 | 0.11597 | -157.51327 | 33.845275 | 31.60 |
| 0.644 | -157.62943 | 0.11598 | -157.51345 | 33.723415 | 31.48 |
| 0.664 | -157.62963 | 0.11599 | -157.51364 | 33.596772 | 31.36 |
| 0.684 | -157.62984 | 0.11600 | -157.51384 | 33.465908 | 31.24 |
| 0.704 | -157.63006 | 0.11601 | -157.51405 | 33.330189 | 31.11 |
| 0.724 | -157.63028 | 0.11602 | -157.51426 | 33.190237 | 30.98 |
| 0.744 | -157.63051 | 0.11603 | -157.51448 | 33.045716 | 30.84 |
| 0.764 | -157.63075 | 0.11604 | -157.51471 | 32.896627 | 30.70 |
| 0.784 | -157.63099 | 0.11606 | -157.51494 | 32.743023 | 30.55 |
| 0.804 | -157.63125 | 0.11607 | -157.51518 | 32.584485 | 30.40 |
| 0.824 | -157.63151 | 0.11608 | -157.51543 | 32.42174  | 30.24 |
| 0.844 | -157.63177 | 0.11609 | -157.51569 | 32.254519 | 30.08 |
| 0.864 | -157.63205 | 0.11610 | -157.51595 | 32.082782 | 29.91 |
| 0.884 | -157.63233 | 0.11611 | -157.51622 | 31.90655  | 29.74 |
| 0.904 | -157.63261 | 0.11612 | -157.51650 | 31.72585  | 29.57 |
| 0.924 | -157.63291 | 0.11613 | -157.51678 | 31.540784 | 29.39 |
| 0.944 | -157.63321 | 0.11614 | -157.51708 | 31.35131  | 29.21 |
| 0.964 | -157.63352 | 0.11614 | -157.51738 | 31.157483 | 29.02 |
| 0.984 | -157.63384 | 0.11615 | -157.51768 | 30.959352 | 28.83 |
| 1.004 | -157.63416 | 0.11616 | -157.51800 | 30.757016 | 28.63 |
| 1.024 | -157.63449 | 0.11617 | -157.51832 | 30.550977 | 28.43 |
| 1.044 | -157.63482 | 0.11618 | -157.51864 | 30.340365 | 28.23 |
| 1.064 | -157.63516 | 0.11619 | -157.51897 | 30.125604 | 28.02 |
| 1.084 | -157.63551 | 0.11620 | -157.51931 | 29.906924 | 27.80 |
| 1.104 | -157.63587 | 0.11621 | -157.51966 | 29.684256 | 27.59 |
| 1.124 | -157.63623 | 0.11622 | -157.52001 | 29.458327 | 27.36 |
| 1.144 | -157.63660 | 0.11622 | -157.52037 | 29.228072 | 27.14 |
| 1.164 | -157.63697 | 0.11623 | -157.52074 | 28.994125 | 26.91 |
| 1.184 | -157.63735 | 0.11624 | -157.52110 | 28.757128 | 26.68 |
| 1.204 | -157.63773 | 0.11625 | -157.52148 | 28.516024 | 26.44 |
| 1.224 | -157.63812 | 0.11626 | -157.52186 | 28.272085 | 26.21 |
| 1.244 | -157.63851 | 0.11627 | -157.52225 | 28.024206 | 25.96 |
| 1.264 | -157.63891 | 0.11627 | -157.52264 | 27.773682 | 25.72 |
| 1.284 | -157.63932 | 0.11628 | -157.52304 | 27.519385 | 25.47 |

|       |            |         |            |           |       |
|-------|------------|---------|------------|-----------|-------|
| 1.304 | -157.63973 | 0.11629 | -157.52344 | 27.262627 | 25.22 |
| 1.324 | -157.64014 | 0.11630 | -157.52384 | 27.002265 | 24.96 |
| 1.344 | -157.64056 | 0.11631 | -157.52426 | 26.739679 | 24.70 |
| 1.364 | -157.64098 | 0.11631 | -157.52467 | 26.47434  | 24.44 |
| 1.384 | -157.64141 | 0.11632 | -157.52509 | 26.20627  | 24.18 |
| 1.404 | -157.64184 | 0.11633 | -157.52551 | 25.935026 | 23.91 |
| 1.424 | -157.64228 | 0.11634 | -157.52594 | 25.661891 | 23.64 |
| 1.444 | -157.64272 | 0.11634 | -157.52637 | 25.386382 | 23.37 |
| 1.464 | -157.64316 | 0.11635 | -157.52681 | 25.108607 | 23.10 |
| 1.484 | -157.64361 | 0.11636 | -157.52725 | 24.829321 | 22.83 |
| 1.504 | -157.64405 | 0.11637 | -157.52769 | 24.54724  | 22.55 |
| 1.524 | -157.64451 | 0.11638 | -157.52813 | 24.263199 | 22.27 |
| 1.544 | -157.64496 | 0.11638 | -157.52858 | 23.977922 | 21.99 |
| 1.564 | -157.64542 | 0.11639 | -157.52903 | 23.690194 | 21.71 |
| 1.584 | -157.64588 | 0.11640 | -157.52948 | 23.401396 | 21.42 |
| 1.604 | -157.64634 | 0.11641 | -157.52994 | 23.11101  | 21.14 |
| 1.624 | -157.64681 | 0.11641 | -157.53040 | 22.818392 | 20.85 |
| 1.644 | -157.64728 | 0.11642 | -157.53086 | 22.525069 | 20.56 |
| 1.664 | -157.64775 | 0.11643 | -157.53132 | 22.231094 | 20.27 |
| 1.684 | -157.64822 | 0.11644 | -157.53178 | 21.935181 | 19.98 |
| 1.704 | -157.64869 | 0.11644 | -157.53225 | 21.638062 | 19.69 |
| 1.724 | -157.64916 | 0.11645 | -157.53271 | 21.340626 | 19.39 |
| 1.744 | -157.64964 | 0.11646 | -157.53318 | 21.041478 | 19.10 |
| 1.764 | -157.65012 | 0.11647 | -157.53365 | 20.742113 | 18.81 |
| 1.784 | -157.65060 | 0.11647 | -157.53412 | 20.441998 | 18.51 |
| 1.804 | -157.65108 | 0.11648 | -157.53459 | 20.14183  | 18.21 |
| 1.824 | -157.65156 | 0.11649 | -157.53507 | 19.840314 | 17.92 |
| 1.844 | -157.65204 | 0.11650 | -157.53554 | 19.538931 | 17.62 |
| 1.864 | -157.65252 | 0.11650 | -157.53601 | 19.236339 | 17.32 |
| 1.884 | -157.65300 | 0.11651 | -157.53649 | 18.934855 | 17.03 |
| 1.904 | -157.65348 | 0.11652 | -157.53696 | 18.632246 | 16.73 |
| 1.924 | -157.65396 | 0.11653 | -157.53744 | 18.329404 | 16.43 |
| 1.944 | -157.65445 | 0.11653 | -157.53791 | 18.027103 | 16.13 |
| 1.964 | -157.65493 | 0.11654 | -157.53838 | 17.724772 | 15.84 |
| 1.984 | -157.65541 | 0.11655 | -157.53886 | 17.422402 | 15.54 |
| 2.004 | -157.65589 | 0.11656 | -157.53933 | 17.120038 | 15.24 |
| 2.024 | -157.65637 | 0.11657 | -157.53981 | 16.818625 | 14.94 |
| 2.044 | -157.65685 | 0.11657 | -157.54028 | 16.517366 | 14.65 |
| 2.064 | -157.65733 | 0.11658 | -157.54075 | 16.216435 | 14.35 |
| 2.084 | -157.65781 | 0.11659 | -157.54122 | 15.91657  | 14.06 |
| 2.104 | -157.65829 | 0.11660 | -157.54169 | 15.617125 | 13.76 |
| 2.124 | -157.65876 | 0.11660 | -157.54216 | 15.318182 | 13.47 |
| 2.144 | -157.65924 | 0.11661 | -157.54263 | 15.019855 | 13.17 |
| 2.164 | -157.65971 | 0.11662 | -157.54309 | 14.722895 | 12.88 |
| 2.184 | -157.66018 | 0.11663 | -157.54356 | 14.42667  | 12.59 |
| 2.204 | -157.66065 | 0.11663 | -157.54402 | 14.131149 | 12.30 |

|       |            |         |            |           |       |
|-------|------------|---------|------------|-----------|-------|
| 2.224 | -157.66112 | 0.11664 | -157.54448 | 13.837305 | 12.01 |
| 2.244 | -157.66159 | 0.11665 | -157.54494 | 13.544431 | 11.72 |
| 2.264 | -157.66205 | 0.11666 | -157.54540 | 13.25326  | 11.44 |
| 2.284 | -157.66252 | 0.11667 | -157.54585 | 12.963136 | 11.15 |
| 2.304 | -157.66298 | 0.11667 | -157.54630 | 12.674193 | 10.87 |
| 2.324 | -157.66343 | 0.11668 | -157.54675 | 12.387205 | 10.59 |
| 2.344 | -157.66389 | 0.11669 | -157.54720 | 12.101553 | 10.30 |
| 2.364 | -157.66434 | 0.11670 | -157.54764 | 11.81715  | 10.03 |
| 2.384 | -157.66479 | 0.11671 | -157.54808 | 11.535048 | 9.75  |
| 2.404 | -157.66524 | 0.11672 | -157.54852 | 11.254333 | 9.47  |
| 2.424 | -157.66568 | 0.11672 | -157.54896 | 10.97601  | 9.20  |
| 2.444 | -157.66612 | 0.11673 | -157.54939 | 10.700065 | 8.93  |
| 2.464 | -157.66656 | 0.11674 | -157.54982 | 10.425011 | 8.66  |
| 2.484 | -157.66699 | 0.11675 | -157.55024 | 10.153267 | 8.39  |
| 2.504 | -157.66742 | 0.11676 | -157.55067 | 9.8827524 | 8.13  |
| 2.524 | -157.66785 | 0.11677 | -157.55108 | 9.6155008 | 7.87  |
| 2.544 | -157.66827 | 0.11678 | -157.55150 | 9.3502734 | 7.61  |
| 2.564 | -157.66869 | 0.11679 | -157.55190 | 9.0870811 | 7.35  |
| 2.584 | -157.66911 | 0.11680 | -157.55231 | 8.8268462 | 7.10  |
| 2.604 | -157.66952 | 0.11681 | -157.55271 | 8.5695286 | 6.85  |
| 2.624 | -157.66992 | 0.11682 | -157.55311 | 8.3144402 | 6.60  |
| 2.644 | -157.67032 | 0.11683 | -157.55350 | 8.0624567 | 6.35  |
| 2.664 | -157.67072 | 0.11684 | -157.55388 | 7.813555  | 6.11  |
| 2.684 | -157.67111 | 0.11685 | -157.55426 | 7.5673313 | 5.87  |
| 2.704 | -157.67150 | 0.11686 | -157.55464 | 7.3242499 | 5.64  |
| 2.724 | -157.67188 | 0.11687 | -157.55501 | 7.0844781 | 5.40  |
| 2.744 | -157.67226 | 0.11688 | -157.55538 | 6.8475175 | 5.17  |
| 2.764 | -157.67263 | 0.11690 | -157.55574 | 6.6146492 | 4.95  |
| 2.784 | -157.67300 | 0.11691 | -157.55609 | 6.3846554 | 4.73  |
| 2.804 | -157.67336 | 0.11692 | -157.55644 | 6.1583655 | 4.51  |
| 2.824 | -157.67371 | 0.11694 | -157.55678 | 5.9356159 | 4.29  |
| 2.844 | -157.67406 | 0.11695 | -157.55712 | 5.7166034 | 4.08  |
| 2.864 | -157.67441 | 0.11696 | -157.55744 | 5.5015073 | 3.88  |
| 2.884 | -157.67474 | 0.11698 | -157.55777 | 5.2901618 | 3.67  |
| 2.904 | -157.67507 | 0.11699 | -157.55808 | 5.0832642 | 3.48  |
| 2.924 | -157.67540 | 0.11701 | -157.55839 | 4.879942  | 3.28  |
| 2.944 | -157.67571 | 0.11702 | -157.55869 | 4.681087  | 3.09  |
| 2.964 | -157.67602 | 0.11704 | -157.55899 | 4.4858284 | 2.91  |
| 2.984 | -157.67633 | 0.11706 | -157.55927 | 4.2957597 | 2.73  |
| 3.004 | -157.67662 | 0.11707 | -157.55955 | 4.109941  | 2.55  |
| 3.024 | -157.67691 | 0.11709 | -157.55982 | 3.928292  | 2.38  |
| 3.044 | -157.67719 | 0.11711 | -157.56008 | 3.7515754 | 2.22  |
| 3.064 | -157.67747 | 0.11713 | -157.56034 | 3.5790611 | 2.06  |
| 3.084 | -157.67774 | 0.11715 | -157.56059 | 3.4119726 | 1.90  |
| 3.104 | -157.67800 | 0.11717 | -157.56082 | 3.2493401 | 1.76  |
| 3.124 | -157.67825 | 0.11719 | -157.56105 | 3.0919336 | 1.61  |

|       |            |         |            |           |      |
|-------|------------|---------|------------|-----------|------|
| 3.144 | -157.67849 | 0.11722 | -157.56127 | 2.9395612 | 1.47 |
| 3.164 | -157.67872 | 0.11724 | -157.56148 | 2.7920113 | 1.34 |
| 3.184 | -157.67895 | 0.11727 | -157.56168 | 2.6498523 | 1.22 |
| 3.204 | -157.67917 | 0.11729 | -157.56188 | 2.5129351 | 1.10 |
| 3.224 | -157.67938 | 0.11732 | -157.56206 | 2.381359  | 0.98 |
| 3.244 | -157.67958 | 0.11735 | -157.56223 | 2.2548883 | 0.87 |
| 3.264 | -157.67977 | 0.11738 | -157.56239 | 2.1342306 | 0.77 |
| 3.284 | -157.67996 | 0.11742 | -157.56254 | 2.0186587 | 0.68 |
| 3.304 | -157.68013 | 0.11745 | -157.56268 | 1.9086822 | 0.59 |
| 3.324 | -157.68030 | 0.11749 | -157.56281 | 1.8039504 | 0.51 |
| 3.344 | -157.68046 | 0.11753 | -157.56292 | 1.7049062 | 0.44 |
| 3.364 | -157.68061 | 0.11758 | -157.56303 | 1.6112453 | 0.37 |
| 3.384 | -157.68075 | 0.11763 | -157.56312 | 1.5227999 | 0.31 |
| 3.404 | -157.68088 | 0.11768 | -157.56320 | 1.4398099 | 0.26 |
| 3.424 | -157.68100 | 0.11773 | -157.56327 | 1.3617433 | 0.22 |
| 3.444 | -157.68112 | 0.11779 | -157.56333 | 1.2888994 | 0.19 |
| 3.464 | -157.68123 | 0.11786 | -157.56337 | 1.2209627 | 0.16 |
| 3.484 | -157.68133 | 0.11793 | -157.56340 | 1.1576765 | 0.14 |
| 3.504 | -157.68142 | 0.11801 | -157.56342 | 1.0990264 | 0.13 |
| 3.524 | -157.68151 | 0.11809 | -157.56342 | 1.0448508 | 0.12 |
| 3.544 | -157.68159 | 0.11817 | -157.56342 | 0.994706  | 0.13 |
| 3.564 | -157.68166 | 0.11825 | -157.56341 | 0.9486246 | 0.13 |
| 3.584 | -157.68173 | 0.11834 | -157.56339 | 0.9064114 | 0.14 |
| 3.604 | -157.68179 | 0.11842 | -157.56337 | 0.8676654 | 0.16 |
| 3.624 | -157.68185 | 0.11849 | -157.56335 | 0.8322211 | 0.17 |
| 3.644 | -157.68190 | 0.11856 | -157.56334 | 0.7995198 | 0.18 |
| 3.664 | -157.68195 | 0.11862 | -157.56333 | 0.7692608 | 0.18 |
| 3.684 | -157.68199 | 0.11867 | -157.56332 | 0.7407757 | 0.19 |
| 3.704 | -157.68204 | 0.11872 | -157.56332 | 0.7135348 | 0.19 |
| 3.724 | -157.68208 | 0.11875 | -157.56333 | 0.6872124 | 0.19 |
| 3.744 | -157.68212 | 0.11879 | -157.56333 | 0.6614928 | 0.18 |
| 3.764 | -157.68216 | 0.11881 | -157.56335 | 0.6364815 | 0.17 |
| 3.784 | -157.68220 | 0.11884 | -157.56336 | 0.6122708 | 0.16 |
| 3.804 | -157.68223 | 0.11886 | -157.56338 | 0.5891655 | 0.15 |
| 3.824 | -157.68227 | 0.11888 | -157.56339 | 0.5673476 | 0.14 |
| 3.844 | -157.68230 | 0.11890 | -157.56340 | 0.5469329 | 0.14 |
| 3.864 | -157.68233 | 0.11890 | -157.56343 | 0.5279274 | 0.12 |
| 3.883 | -157.68236 | 0.11893 | -157.56343 | 0.5101632 | 0.12 |

**SI Table 38:** Calculated high pressure limits of CVT/SCT rate constants for reactions R1-R4.  
 Units are s<sup>-1</sup>.

| T(K) | 1000/T<br>(1/K) | High pressure limit of the rate constants (s <sup>-1</sup> ) |                      |                    |                      |
|------|-----------------|--------------------------------------------------------------|----------------------|--------------------|----------------------|
|      |                 | C•CC → C• +<br>C=C                                           | C•CCC →<br>CC• + C=C | CC•CC→C• +<br>C=CC | C•C(C)C→C•<br>+ C=CC |
| 300  | 3.33            | 7.28E-10                                                     | 9.16E-10             | 4.560E-09          | 2.43E-09             |
| 400  | 2.50            | 2.84E-04                                                     | 3.57E-04             | 1.580E-03          | 9.56E-04             |
| 500  | 2.00            | 7.17E-01                                                     | 8.89E-01             | 3.660E+00          | 2.22E+00             |
| 600  | 1.67            | 1.31E+02                                                     | 1.73E+02             | 6.760E+02          | 4.13E+02             |
| 700  | 1.43            | 5.90E+03                                                     | 7.19E+03             | 3.000E+04          | 1.81E+04             |
| 800  | 1.25            | 1.01E+05                                                     | 1.26E+05             | 4.960E+05          | 3.13E+05             |
| 900  | 1.11            | 9.23E+05                                                     | 1.18E+06             | 4.660E+06          | 2.80E+06             |
| 1000 | 1.00            | 5.33E+06                                                     | 6.65E+06             | 2.740E+07          | 1.67E+07             |
| 1100 | 0.91            | 2.27E+07                                                     | 2.90E+07             | 1.120E+08          | 6.95E+07             |
| 1200 | 0.83            | 7.80E+07                                                     | 9.89E+07             | 3.860E+08          | 2.37E+08             |
| 1300 | 0.77            | 2.11E+08                                                     | 2.70E+08             | 1.100E+09          | 6.73E+08             |
| 1400 | 0.71            | 5.17E+08                                                     | 6.48E+08             | 2.620E+09          | 1.57E+09             |
| 1500 | 0.67            | 1.09E+09                                                     | 1.39E+09             | 5.540E+09          | 3.42E+09             |
| 1600 | 0.63            | 2.15E+09                                                     | 2.63E+09             | 1.060E+10          | 6.78E+09             |
| 1700 | 0.59            | 3.78E+09                                                     | 4.79E+09             | 1.880E+10          | 1.18E+10             |
| 1800 | 0.56            | 6.44E+09                                                     | 8.16E+09             | 3.210E+10          | 2.02E+10             |
| 1900 | 0.53            | 1.04E+10                                                     | 1.32E+10             | 5.180E+10          | 3.27E+10             |
| 2000 | 0.50            | 1.52E+10                                                     | 1.89E+10             | 7.480E+10          | 4.80E+10             |
| 2100 | 0.48            | 2.22E+10                                                     | 2.79E+10             | 1.110E+11          | 7.13E+10             |
| 2200 | 0.45            | 3.15E+10                                                     | 3.97E+10             | 1.580E+11          | 1.02E+11             |
| 2300 | 0.43            | 4.18E+10                                                     | 5.49E+10             | 2.180E+11          | 1.42E+11             |
| 2400 | 0.42            | 5.55E+10                                                     | 7.07E+10             | 2.770E+11          | 1.82E+11             |
| 2500 | 0.40            | 7.25E+10                                                     | 9.28E+10             | 3.630E+11          | 2.41E+11             |
| 2600 | 0.38            | 9.27E+10                                                     | 1.19E+11             | 4.680E+11          | 3.13E+11             |
| 2700 | 0.37            | 1.15E+11                                                     | 1.51E+11             | 5.910E+11          | 3.98E+11             |
| 2800 | 0.36            | 1.39E+11                                                     | 1.87E+11             | 7.130E+11          | 4.71E+11             |
| 2900 | 0.34            | 1.69E+11                                                     | 2.29E+11             | 8.720E+11          | 5.80E+11             |
| 3000 | 0.33            | 2.03E+11                                                     | 2.68E+11             | 1.010E+12          | 7.06E+11             |

**SI Table 39:** Calculated high pressure limits of CVT/SCT rate constants for reactions reverse to R1-R4 ( $R^{-1}$  -  $R^{-4}$ ). Units are  $s^{-1}$ .

| T(K) | 1000/T<br>(1/K) | High pressure limit of the rate constants ( $s^{-1}$ ) |                                             |                                             |                                               |
|------|-----------------|--------------------------------------------------------|---------------------------------------------|---------------------------------------------|-----------------------------------------------|
|      |                 | $C\cdot + C=C \rightarrow$<br>$C\cdot CC$              | $CC\cdot + C=C$<br>$\rightarrow C\cdot CCC$ | $C\cdot + C=CC \rightarrow$<br>$CC\cdot CC$ | $C\cdot + C=CC \rightarrow$<br>$C\cdot C(C)C$ |
| 300  | 3.33            | 7.70E-19                                               | 4.56E-19                                    | 4.79E-19                                    | 5.09E-20                                      |
| 400  | 2.50            | 1.95E-17                                               | 1.16E-17                                    | 1.22E-17                                    | 1.95E-18                                      |
| 500  | 2.00            | 1.57E-16                                               | 9.46E-17                                    | 9.93E-17                                    | 2.02E-17                                      |
| 600  | 1.67            | 6.93E-16                                               | 4.26E-16                                    | 4.47E-16                                    | 1.06E-16                                      |
| 700  | 1.43            | 2.15E-15                                               | 1.35E-15                                    | 1.41E-15                                    | 3.74E-16                                      |
| 800  | 1.25            | 5.31E-15                                               | 3.37E-15                                    | 3.54E-15                                    | 1.01E-15                                      |
| 900  | 1.11            | 1.12E-14                                               | 7.19E-15                                    | 7.55E-15                                    | 2.30E-15                                      |
| 1000 | 1.00            | 2.10E-14                                               | 1.37E-14                                    | 1.43E-14                                    | 4.59E-15                                      |
| 1100 | 0.91            | 3.62E-14                                               | 2.37E-14                                    | 2.49E-14                                    | 8.30E-15                                      |
| 1200 | 0.83            | 5.82E-14                                               | 3.85E-14                                    | 4.05E-14                                    | 1.39E-14                                      |
| 1300 | 0.77            | 8.88E-14                                               | 5.93E-14                                    | 6.22E-14                                    | 2.20E-14                                      |
| 1400 | 0.71            | 1.30E-13                                               | 8.72E-14                                    | 9.16E-14                                    | 3.31E-14                                      |
| 1500 | 0.67            | 1.83E-13                                               | 1.24E-13                                    | 1.30E-13                                    | 4.78E-14                                      |
| 1600 | 0.63            | 2.50E-13                                               | 1.70E-13                                    | 1.79E-13                                    | 6.69E-14                                      |
| 1700 | 0.59            | 3.32E-13                                               | 2.28E-13                                    | 2.39E-13                                    | 9.09E-14                                      |
| 1800 | 0.56            | 4.33E-13                                               | 2.99E-13                                    | 3.14E-13                                    | 1.21E-13                                      |
| 1900 | 0.53            | 5.54E-13                                               | 3.84E-13                                    | 4.03E-13                                    | 1.57E-13                                      |
| 2000 | 0.50            | 6.97E-13                                               | 4.86E-13                                    | 5.10E-13                                    | 2.00E-13                                      |
| 2100 | 0.48            | 8.64E-13                                               | 6.05E-13                                    | 6.35E-13                                    | 2.51E-13                                      |
| 2200 | 0.45            | 1.06E-12                                               | 7.43E-13                                    | 7.80E-13                                    | 3.11E-13                                      |
| 2300 | 0.43            | 1.28E-12                                               | 9.03E-13                                    | 9.48E-13                                    | 3.80E-13                                      |
| 2400 | 0.42            | 1.53E-12                                               | 1.09E-12                                    | 1.14E-12                                    | 4.60E-13                                      |
| 2500 | 0.40            | 1.81E-12                                               | 1.29E-12                                    | 1.36E-12                                    | 5.50E-13                                      |
| 2600 | 0.38            | 2.13E-12                                               | 1.53E-12                                    | 1.60E-12                                    | 6.52E-13                                      |
| 2700 | 0.37            | 2.49E-12                                               | 1.79E-12                                    | 1.88E-12                                    | 7.67E-13                                      |
| 2800 | 0.36            | 2.88E-12                                               | 2.08E-12                                    | 2.18E-12                                    | 8.95E-13                                      |
| 2900 | 0.34            | 3.32E-12                                               | 2.40E-12                                    | 2.52E-12                                    | 1.04E-12                                      |
| 3000 | 0.33            | 3.80E-12                                               | 2.76E-12                                    | 2.89E-12                                    | 1.20E-12                                      |

**SI Table 40:** Calculation of the RC-TST rate constants for the reaction R5: C•CCCCC → C•CCC + C=C.

| R5   |                    | Delta V = 34.112 kcal/mol |            |           |        |      |                |          |
|------|--------------------|---------------------------|------------|-----------|--------|------|----------------|----------|
| T    | k <sub>r</sub> (T) | FACTORS                   |            |           |        |      | Rate Constants | log k(T) |
|      |                    | Symmetry                  | Tunnelling | Partition | Energy | HR   |                |          |
| 300  | 7.28E-10           | 1.00                      | 0.98       | 0.94      | 19.90  | 1.00 | 1.34E-08       | -7.87    |
| 400  | 2.84E-04           | 1.00                      | 0.99       | 0.93      | 9.42   | 0.99 | 2.43E-03       | -2.61    |
| 500  | 7.17E-01           | 1.00                      | 0.99       | 0.93      | 6.02   | 0.99 | 3.90E+00       | 0.59     |
| 600  | 1.31E+02           | 1.00                      | 0.99       | 0.94      | 4.46   | 0.99 | 5.35E+02       | 2.73     |
| 700  | 5.90E+03           | 1.00                      | 0.99       | 0.95      | 3.60   | 0.99 | 1.98E+04       | 4.30     |
| 800  | 1.01E+05           | 1.00                      | 0.99       | 0.96      | 3.07   | 1.00 | 2.96E+05       | 5.47     |
| 900  | 9.23E+05           | 1.00                      | 1.00       | 0.98      | 2.71   | 1.01 | 2.45E+06       | 6.39     |
| 1000 | 5.33E+06           | 1.00                      | 1.00       | 0.99      | 2.45   | 1.02 | 1.31E+07       | 7.12     |
| 1100 | 2.27E+07           | 1.00                      | 1.00       | 1.00      | 2.26   | 1.03 | 5.26E+07       | 7.72     |
| 1200 | 7.80E+07           | 1.00                      | 1.00       | 1.00      | 2.11   | 1.01 | 1.67E+08       | 8.22     |
| 1300 | 2.11E+08           | 1.00                      | 1.00       | 1.01      | 1.99   | 0.96 | 4.07E+08       | 8.61     |
| 1400 | 5.17E+08           | 1.00                      | 1.00       | 1.01      | 1.90   | 0.95 | 9.43E+08       | 8.97     |
| 1500 | 1.09E+09           | 1.00                      | 1.00       | 1.02      | 1.82   | 0.92 | 1.85E+09       | 9.27     |
| 1600 | 2.15E+09           | 1.00                      | 1.00       | 1.02      | 1.75   | 0.94 | 3.60E+09       | 9.56     |
| 1700 | 3.78E+09           | 1.00                      | 1.00       | 1.02      | 1.70   | 0.88 | 5.74E+09       | 9.76     |
| 1800 | 6.44E+09           | 1.00                      | 1.00       | 1.02      | 1.65   | 0.87 | 9.38E+09       | 9.97     |
| 1900 | 1.04E+10           | 1.00                      | 1.00       | 1.02      | 1.60   | 0.85 | 1.44E+10       | 10.16    |
| 2000 | 1.52E+10           | 1.00                      | 1.00       | 1.02      | 1.57   | 0.86 | 2.08E+10       | 10.32    |
| 2100 | 2.22E+10           | 1.00                      | 1.00       | 1.01      | 1.53   | 0.84 | 2.89E+10       | 10.46    |
| 2200 | 3.15E+10           | 1.00                      | 1.00       | 1.01      | 1.50   | 0.82 | 3.92E+10       | 10.59    |
| 2300 | 4.18E+10           | 1.00                      | 1.00       | 1.01      | 1.48   | 0.80 | 4.97E+10       | 10.70    |
| 2400 | 5.55E+10           | 1.00                      | 1.00       | 1.01      | 1.45   | 0.78 | 6.31E+10       | 10.80    |
| 2500 | 7.25E+10           | 1.00                      | 1.00       | 1.00      | 1.43   | 0.79 | 8.20E+10       | 10.91    |
| 2600 | 9.27E+10           | 1.00                      | 1.00       | 1.00      | 1.41   | 0.77 | 1.00E+11       | 11.00    |
| 2700 | 1.15E+11           | 1.00                      | 1.00       | 0.99      | 1.39   | 0.76 | 1.21E+11       | 11.08    |
| 2800 | 1.39E+11           | 1.00                      | 1.00       | 0.99      | 1.38   | 0.77 | 1.45E+11       | 11.16    |
| 2900 | 1.69E+11           | 1.00                      | 1.00       | 0.98      | 1.36   | 0.75 | 1.69E+11       | 11.23    |
| 3000 | 2.03E+11           | 1.00                      | 1.00       | 0.98      | 1.35   | 0.74 | 1.98E+11       | 11.30    |

**SI Table 41:** Calculation of the RC-TST rate constants for the reaction R6:  $\text{CC}\cdot\text{CCCC} \rightarrow \text{C}\cdot\text{CC} + \text{C}=\text{CC}$ .

| <b>R6</b> |                         | <b>Delta V = 34.781 kcal/mol</b> |            |           |        |      |                       |                 |
|-----------|-------------------------|----------------------------------|------------|-----------|--------|------|-----------------------|-----------------|
| <b>T</b>  | <b>k<sub>r</sub>(T)</b> | <b>FACTORS</b>                   |            |           |        |      | <b>Rate Constants</b> | <b>log k(T)</b> |
|           |                         | Symmetry                         | Tunnelling | Partition | Energy | HR   |                       |                 |
| 300       | 7.28E-10                | 1.00                             | 0.99       | 0.94      | 6.48   | 0.95 | 4.16E-09              | -8.38           |
| 400       | 2.84E-04                | 1.00                             | 1.00       | 0.99      | 4.06   | 1.14 | 1.29E-03              | -2.89           |
| 500       | 7.17E-01                | 1.00                             | 1.00       | 1.01      | 3.07   | 1.26 | 2.80E+00              | 0.45            |
| 600       | 1.31E+02                | 1.00                             | 1.00       | 1.03      | 2.55   | 1.34 | 4.61E+02              | 2.66            |
| 700       | 5.90E+03                | 1.00                             | 1.00       | 1.05      | 2.23   | 1.40 | 1.92E+04              | 4.28            |
| 800       | 1.01E+05                | 1.00                             | 1.00       | 1.06      | 2.02   | 1.44 | 3.10E+05              | 5.49            |
| 900       | 9.23E+05                | 1.00                             | 1.00       | 1.07      | 1.86   | 1.47 | 2.70E+06              | 6.43            |
| 1000      | 5.33E+06                | 1.00                             | 1.00       | 1.08      | 1.75   | 1.49 | 1.50E+07              | 7.18            |
| 1100      | 2.27E+07                | 1.00                             | 1.00       | 1.08      | 1.66   | 1.51 | 6.17E+07              | 7.79            |
| 1200      | 7.80E+07                | 1.00                             | 1.00       | 1.09      | 1.60   | 1.52 | 2.06E+08              | 8.31            |
| 1300      | 2.11E+08                | 1.00                             | 1.00       | 1.09      | 1.54   | 1.53 | 5.43E+08              | 8.73            |
| 1400      | 5.17E+08                | 1.00                             | 1.00       | 1.10      | 1.49   | 1.54 | 1.30E+09              | 9.11            |
| 1500      | 1.09E+09                | 1.00                             | 1.00       | 1.10      | 1.45   | 1.55 | 2.69E+09              | 9.43            |
| 1600      | 2.15E+09                | 1.00                             | 1.00       | 1.10      | 1.42   | 1.56 | 5.22E+09              | 9.72            |
| 1700      | 3.78E+09                | 1.00                             | 1.00       | 1.10      | 1.39   | 1.56 | 9.05E+09              | 9.96            |
| 1800      | 6.44E+09                | 1.00                             | 1.00       | 1.10      | 1.37   | 1.57 | 1.52E+10              | 10.18           |
| 1900      | 1.04E+10                | 1.00                             | 1.00       | 1.11      | 1.34   | 1.57 | 2.42E+10              | 10.38           |
| 2000      | 1.52E+10                | 1.00                             | 1.00       | 1.11      | 1.32   | 1.57 | 3.50E+10              | 10.54           |
| 2100      | 2.22E+10                | 1.00                             | 1.00       | 1.11      | 1.31   | 1.58 | 5.06E+10              | 10.70           |
| 2200      | 3.15E+10                | 1.00                             | 1.00       | 1.11      | 1.29   | 1.58 | 7.11E+10              | 10.85           |
| 2300      | 4.18E+10                | 1.00                             | 1.00       | 1.11      | 1.28   | 1.58 | 9.36E+10              | 10.97           |
| 2400      | 5.55E+10                | 1.00                             | 1.00       | 1.11      | 1.26   | 1.58 | 1.23E+11              | 11.09           |
| 2500      | 7.25E+10                | 1.00                             | 1.00       | 1.11      | 1.25   | 1.59 | 1.60E+11              | 11.20           |
| 2600      | 9.27E+10                | 1.00                             | 1.00       | 1.11      | 1.24   | 1.59 | 2.03E+11              | 11.31           |
| 2700      | 1.15E+11                | 1.00                             | 1.00       | 1.11      | 1.23   | 1.59 | 2.50E+11              | 11.40           |
| 2800      | 1.39E+11                | 1.00                             | 1.00       | 1.11      | 1.22   | 1.59 | 3.00E+11              | 11.48           |
| 2900      | 1.69E+11                | 1.00                             | 1.00       | 1.11      | 1.21   | 1.59 | 3.63E+11              | 11.56           |
| 3000      | 2.03E+11                | 1.00                             | 1.00       | 1.11      | 1.21   | 1.59 | 4.33E+11              | 11.64           |



**SI Table 42:** Calculation of the RC-TST rate constants for the reaction R7: CCC•CCC → C•C + C=CCC.

| R7   |                    | Delta V = 34.549 kcal/mol |            |           |        |      |                |          |
|------|--------------------|---------------------------|------------|-----------|--------|------|----------------|----------|
| T    | k <sub>r</sub> (T) | FACTORS                   |            |           |        |      | Rate Constants | log k(T) |
|      |                    | Symmetry                  | Tunnelling | Partition | Energy | HR   |                |          |
| 300  | 7.28E-10           | 1.00                      | 1.02       | 0.93      | 9.56   | 1.25 | 8.23E-09       | -8.08    |
| 400  | 2.84E-04           | 1.00                      | 1.01       | 1.08      | 5.44   | 1.23 | 2.08E-03       | -2.68    |
| 500  | 7.17E-01           | 1.00                      | 1.01       | 1.17      | 3.88   | 1.25 | 4.11E+00       | 0.61     |
| 600  | 1.31E+02           | 1.00                      | 1.01       | 1.23      | 3.09   | 1.20 | 6.03E+02       | 2.78     |
| 700  | 5.90E+03           | 1.00                      | 1.01       | 1.27      | 2.63   | 1.21 | 2.40E+04       | 4.38     |
| 800  | 1.01E+05           | 1.00                      | 1.00       | 1.30      | 2.33   | 1.22 | 3.75E+05       | 5.57     |
| 900  | 9.23E+05           | 1.00                      | 1.00       | 1.32      | 2.12   | 1.20 | 3.11E+06       | 6.49     |
| 1000 | 5.33E+06           | 1.00                      | 1.00       | 1.33      | 1.97   | 1.15 | 1.62E+07       | 7.21     |
| 1100 | 2.27E+07           | 1.00                      | 1.00       | 1.35      | 1.85   | 1.18 | 6.70E+07       | 7.83     |
| 1200 | 7.80E+07           | 1.00                      | 1.00       | 1.35      | 1.76   | 1.13 | 2.11E+08       | 8.32     |
| 1300 | 2.11E+08           | 1.00                      | 1.00       | 1.36      | 1.68   | 1.12 | 5.43E+08       | 8.74     |
| 1400 | 5.17E+08           | 1.00                      | 1.00       | 1.37      | 1.62   | 1.10 | 1.26E+09       | 9.10     |
| 1500 | 1.09E+09           | 1.00                      | 1.00       | 1.37      | 1.57   | 1.11 | 2.60E+09       | 9.42     |
| 1600 | 2.15E+09           | 1.00                      | 1.00       | 1.38      | 1.53   | 1.11 | 5.04E+09       | 9.70     |
| 1700 | 3.78E+09           | 1.00                      | 1.00       | 1.38      | 1.49   | 1.12 | 8.74E+09       | 9.94     |
| 1800 | 6.44E+09           | 1.00                      | 1.00       | 1.38      | 1.46   | 1.13 | 1.47E+10       | 10.17    |
| 1900 | 1.04E+10           | 1.00                      | 1.00       | 1.38      | 1.43   | 1.14 | 2.34E+10       | 10.37    |
| 2000 | 1.52E+10           | 1.00                      | 1.00       | 1.39      | 1.40   | 1.14 | 3.38E+10       | 10.53    |
| 2100 | 2.22E+10           | 1.00                      | 1.00       | 1.39      | 1.38   | 1.15 | 4.91E+10       | 10.69    |
| 2200 | 3.15E+10           | 1.00                      | 1.00       | 1.39      | 1.36   | 1.16 | 6.89E+10       | 10.84    |
| 2300 | 4.18E+10           | 1.00                      | 1.00       | 1.39      | 1.34   | 1.16 | 9.10E+10       | 10.96    |
| 2400 | 5.55E+10           | 1.00                      | 1.00       | 1.39      | 1.33   | 1.17 | 1.20E+11       | 11.08    |
| 2500 | 7.25E+10           | 1.00                      | 1.00       | 1.39      | 1.31   | 1.18 | 1.56E+11       | 11.19    |
| 2600 | 9.27E+10           | 1.00                      | 1.00       | 1.39      | 1.30   | 1.18 | 1.98E+11       | 11.30    |
| 2700 | 1.15E+11           | 1.00                      | 1.00       | 1.39      | 1.29   | 1.19 | 2.44E+11       | 11.39    |
| 2800 | 1.39E+11           | 1.00                      | 1.00       | 1.40      | 1.27   | 1.18 | 2.92E+11       | 11.46    |
| 2900 | 1.69E+11           | 1.00                      | 1.00       | 1.40      | 1.26   | 1.17 | 3.49E+11       | 11.54    |
| 3000 | 2.03E+11           | 1.00                      | 1.00       | 1.40      | 1.25   | 1.14 | 4.05E+11       | 11.61    |

**SI Table 43:** Calculation of the RC-TST rate constants for the reaction R8: C•CCCCCC → C•CCCCC + C=C.

| R8   |                    | Delta V = 34.114 kcal/mol |            |           |        |      |                |          |
|------|--------------------|---------------------------|------------|-----------|--------|------|----------------|----------|
| T    | k <sub>r</sub> (T) | FACTORS                   |            |           |        |      | Rate Constants | log k(T) |
|      |                    | Symmetry                  | Tunnelling | Partition | Energy | HR   |                |          |
| 300  | 7.28E-10           | 1.00                      | 0.98       | 0.73      | 3.71   | 1.02 | 1.96E-09       | -8.71    |
| 400  | 2.84E-04           | 1.00                      | 0.99       | 0.87      | 2.67   | 1.01 | 6.58E-04       | -3.18    |
| 500  | 7.17E-01           | 1.00                      | 0.99       | 0.95      | 2.19   | 1.00 | 1.48E+00       | 0.17     |
| 600  | 1.31E+02           | 1.00                      | 0.99       | 1.00      | 1.93   | 1.00 | 2.50E+02       | 2.40     |
| 700  | 5.90E+03           | 1.00                      | 0.99       | 1.03      | 1.75   | 1.01 | 1.06E+04       | 4.03     |
| 800  | 1.01E+05           | 1.00                      | 0.99       | 1.04      | 1.63   | 1.02 | 1.74E+05       | 5.24     |
| 900  | 9.23E+05           | 1.00                      | 0.99       | 1.06      | 1.55   | 1.03 | 1.54E+06       | 6.19     |
| 1000 | 5.33E+06           | 1.00                      | 1.00       | 1.07      | 1.48   | 1.04 | 8.71E+06       | 6.94     |
| 1100 | 2.27E+07           | 1.00                      | 1.00       | 1.07      | 1.43   | 1.05 | 3.64E+07       | 7.56     |
| 1200 | 7.80E+07           | 1.00                      | 1.00       | 1.08      | 1.39   | 1.06 | 1.23E+08       | 8.09     |
| 1300 | 2.11E+08           | 1.00                      | 1.00       | 1.08      | 1.35   | 1.07 | 3.31E+08       | 8.52     |
| 1400 | 5.17E+08           | 1.00                      | 1.00       | 1.08      | 1.32   | 1.09 | 8.03E+08       | 8.90     |
| 1500 | 1.09E+09           | 1.00                      | 1.00       | 1.09      | 1.30   | 1.10 | 1.68E+09       | 9.23     |
| 1600 | 2.15E+09           | 1.00                      | 1.00       | 1.09      | 1.28   | 1.11 | 3.31E+09       | 9.52     |
| 1700 | 3.78E+09           | 1.00                      | 1.00       | 1.09      | 1.26   | 1.12 | 5.78E+09       | 9.76     |
| 1800 | 6.44E+09           | 1.00                      | 1.00       | 1.09      | 1.24   | 1.13 | 9.81E+09       | 9.99     |
| 1900 | 1.04E+10           | 1.00                      | 1.00       | 1.09      | 1.23   | 1.14 | 1.58E+10       | 10.20    |
| 2000 | 1.52E+10           | 1.00                      | 1.00       | 1.09      | 1.22   | 1.15 | 2.31E+10       | 10.36    |
| 2100 | 2.22E+10           | 1.00                      | 1.00       | 1.09      | 1.21   | 1.15 | 3.37E+10       | 10.53    |
| 2200 | 3.15E+10           | 1.00                      | 1.00       | 1.09      | 1.20   | 1.16 | 4.77E+10       | 10.68    |
| 2300 | 4.18E+10           | 1.00                      | 1.00       | 1.09      | 1.19   | 1.17 | 6.32E+10       | 10.80    |
| 2400 | 5.55E+10           | 1.00                      | 1.00       | 1.09      | 1.18   | 1.18 | 8.39E+10       | 10.92    |
| 2500 | 7.25E+10           | 1.00                      | 1.00       | 1.09      | 1.17   | 1.18 | 1.09E+11       | 11.04    |
| 2600 | 9.27E+10           | 1.00                      | 1.00       | 1.09      | 1.16   | 1.19 | 1.40E+11       | 11.15    |
| 2700 | 1.15E+11           | 1.00                      | 1.00       | 1.09      | 1.16   | 1.19 | 1.73E+11       | 11.24    |
| 2800 | 1.39E+11           | 1.00                      | 1.00       | 1.09      | 1.15   | 1.20 | 2.10E+11       | 11.32    |
| 2900 | 1.69E+11           | 1.00                      | 1.00       | 1.09      | 1.15   | 1.20 | 2.55E+11       | 11.41    |
| 3000 | 2.03E+11           | 1.00                      | 1.00       | 1.09      | 1.14   | 1.21 | 3.06E+11       | 11.49    |

**SI Table 44:** Calculation of the RC-TST rate constants for the reaction R9: CC•CCCCCC → C•CCCC + C=CC.

| R9   |                    | Delta V = 36.536 kcal/mol |            |           |        |      |                |          |
|------|--------------------|---------------------------|------------|-----------|--------|------|----------------|----------|
| T    | k <sub>r</sub> (T) | FACTORS                   |            |           |        |      | Rate Constants | log k(T) |
|      |                    | Symmetry                  | Tunnelling | Partition | Energy | HR   |                |          |
| 300  | 7.28E-10           | 1.00                      | 1.02       | 1.16      | 4.22   | 1.22 | 4.46E-09       | -8.35    |
| 400  | 2.84E-04           | 1.00                      | 1.01       | 1.39      | 2.95   | 1.20 | 1.42E-03       | -2.85    |
| 500  | 7.17E-01           | 1.00                      | 1.01       | 1.53      | 2.37   | 1.24 | 3.26E+00       | 0.51     |
| 600  | 1.31E+02           | 1.00                      | 1.01       | 1.62      | 2.06   | 1.27 | 5.60E+02       | 2.75     |
| 700  | 5.90E+03           | 1.00                      | 1.01       | 1.69      | 1.85   | 1.29 | 2.40E+04       | 4.38     |
| 800  | 1.01E+05           | 1.00                      | 1.01       | 1.74      | 1.72   | 1.30 | 3.96E+05       | 5.60     |
| 900  | 9.23E+05           | 1.00                      | 1.01       | 1.78      | 1.62   | 1.32 | 3.51E+06       | 6.54     |
| 1000 | 5.33E+06           | 1.00                      | 1.00       | 1.80      | 1.54   | 1.32 | 1.96E+07       | 7.29     |
| 1100 | 2.27E+07           | 1.00                      | 1.00       | 1.82      | 1.48   | 1.32 | 8.15E+07       | 7.91     |
| 1200 | 7.80E+07           | 1.00                      | 1.00       | 1.84      | 1.43   | 1.32 | 2.73E+08       | 8.44     |
| 1300 | 2.11E+08           | 1.00                      | 1.00       | 1.86      | 1.39   | 1.32 | 7.22E+08       | 8.86     |
| 1400 | 5.17E+08           | 1.00                      | 1.00       | 1.87      | 1.36   | 1.31 | 1.73E+09       | 9.24     |
| 1500 | 1.09E+09           | 1.00                      | 1.00       | 1.88      | 1.33   | 1.31 | 3.58E+09       | 9.55     |
| 1600 | 2.15E+09           | 1.00                      | 1.00       | 1.88      | 1.31   | 1.30 | 6.91E+09       | 9.84     |
| 1700 | 3.78E+09           | 1.00                      | 1.00       | 1.89      | 1.29   | 1.29 | 1.19E+10       | 10.08    |
| 1800 | 6.44E+09           | 1.00                      | 1.00       | 1.90      | 1.27   | 1.28 | 2.00E+10       | 10.30    |
| 1900 | 1.04E+10           | 1.00                      | 1.00       | 1.90      | 1.26   | 1.27 | 3.16E+10       | 10.50    |
| 2000 | 1.52E+10           | 1.00                      | 1.00       | 1.90      | 1.24   | 1.26 | 4.55E+10       | 10.66    |
| 2100 | 2.22E+10           | 1.00                      | 1.00       | 1.91      | 1.23   | 1.26 | 6.55E+10       | 10.82    |
| 2200 | 3.15E+10           | 1.00                      | 1.00       | 1.91      | 1.22   | 1.24 | 9.13E+10       | 10.96    |
| 2300 | 4.18E+10           | 1.00                      | 1.00       | 1.91      | 1.21   | 1.23 | 1.19E+11       | 11.08    |
| 2400 | 5.55E+10           | 1.00                      | 1.00       | 1.92      | 1.20   | 1.23 | 1.56E+11       | 11.19    |
| 2500 | 7.25E+10           | 1.00                      | 1.00       | 1.92      | 1.19   | 1.21 | 2.01E+11       | 11.30    |
| 2600 | 9.27E+10           | 1.00                      | 1.00       | 1.92      | 1.18   | 1.20 | 2.54E+11       | 11.40    |
| 2700 | 1.15E+11           | 1.00                      | 1.00       | 1.92      | 1.17   | 1.19 | 3.10E+11       | 11.49    |
| 2800 | 1.39E+11           | 1.00                      | 1.00       | 1.92      | 1.17   | 1.18 | 3.70E+11       | 11.57    |
| 2900 | 1.69E+11           | 1.00                      | 1.00       | 1.92      | 1.16   | 1.17 | 4.43E+11       | 11.65    |
| 3000 | 2.03E+11           | 1.00                      | 1.00       | 1.93      | 1.15   | 1.16 | 5.26E+11       | 11.72    |

**SI Table 45:** Calculation of the RC-TST rate constants for the reaction R10:  $\text{CC}\cdot\text{CCCCCC} \rightarrow \text{C}\cdot\text{CCCC} + \text{C}=\text{CC}$ .

| <b>R10</b> |                         | <b>Delta V = 36.510 kcal/mol</b> |            |           |        |      |                       |                 |  |  |
|------------|-------------------------|----------------------------------|------------|-----------|--------|------|-----------------------|-----------------|--|--|
| <b>T</b>   | <b>k<sub>r</sub>(T)</b> | <b>FACTORS</b>                   |            |           |        |      | <b>Rate Constants</b> | <b>log k(T)</b> |  |  |
|            |                         | Symmetry                         | Tunnelling | Partition | Energy | HR   |                       |                 |  |  |
| 300        | 7.28E-10                | 1.00                             | 1.01       | 1.28      | 0.36   | 1.25 | 4.20E-10              | -9.38           |  |  |
| 400        | 2.84E-04                | 1.00                             | 1.01       | 1.31      | 0.46   | 1.22 | 2.11E-04              | -3.68           |  |  |
| 500        | 7.17E-01                | 1.00                             | 1.01       | 1.34      | 0.54   | 1.24 | 6.42E-01              | -0.19           |  |  |
| 600        | 1.31E+02                | 1.00                             | 1.00       | 1.36      | 0.60   | 1.26 | 1.35E+02              | 2.13            |  |  |
| 700        | 5.90E+03                | 1.00                             | 1.00       | 1.39      | 0.64   | 1.29 | 6.79E+03              | 3.83            |  |  |
| 800        | 1.01E+05                | 1.00                             | 1.00       | 1.41      | 0.68   | 1.30 | 1.26E+05              | 5.10            |  |  |
| 900        | 9.23E+05                | 1.00                             | 1.00       | 1.42      | 0.71   | 1.36 | 1.27E+06              | 6.10            |  |  |
| 1000       | 5.33E+06                | 1.00                             | 1.00       | 1.43      | 0.73   | 1.40 | 7.87E+06              | 6.90            |  |  |
| 1100       | 2.27E+07                | 1.00                             | 1.00       | 1.45      | 0.75   | 1.41 | 3.50E+07              | 7.54            |  |  |
| 1200       | 7.80E+07                | 1.00                             | 1.00       | 1.46      | 0.77   | 1.42 | 1.25E+08              | 8.10            |  |  |
| 1300       | 2.11E+08                | 1.00                             | 1.00       | 1.46      | 0.79   | 1.43 | 3.49E+08              | 8.54            |  |  |
| 1400       | 5.17E+08                | 1.00                             | 1.00       | 1.47      | 0.80   | 1.43 | 8.73E+08              | 8.94            |  |  |
| 1500       | 1.09E+09                | 1.00                             | 1.00       | 1.48      | 0.81   | 1.44 | 1.89E+09              | 9.28            |  |  |
| 1600       | 2.15E+09                | 1.00                             | 1.00       | 1.48      | 0.82   | 1.43 | 3.75E+09              | 9.57            |  |  |
| 1700       | 3.78E+09                | 1.00                             | 1.00       | 1.48      | 0.83   | 1.40 | 6.56E+09              | 9.82            |  |  |
| 1800       | 6.44E+09                | 1.00                             | 1.00       | 1.49      | 0.84   | 1.35 | 1.09E+10              | 10.04           |  |  |
| 1900       | 1.04E+10                | 1.00                             | 1.00       | 1.49      | 0.85   | 1.33 | 1.75E+10              | 10.24           |  |  |
| 2000       | 1.52E+10                | 1.00                             | 1.00       | 1.49      | 0.86   | 1.34 | 2.61E+10              | 10.42           |  |  |
| 2100       | 2.22E+10                | 1.00                             | 1.00       | 1.50      | 0.86   | 1.32 | 3.79E+10              | 10.58           |  |  |
| 2200       | 3.15E+10                | 1.00                             | 1.00       | 1.50      | 0.87   | 1.33 | 5.46E+10              | 10.74           |  |  |
| 2300       | 4.18E+10                | 1.00                             | 1.00       | 1.50      | 0.87   | 1.28 | 7.03E+10              | 10.85           |  |  |
| 2400       | 5.55E+10                | 1.00                             | 1.00       | 1.50      | 0.88   | 1.27 | 9.32E+10              | 10.97           |  |  |
| 2500       | 7.25E+10                | 1.00                             | 1.00       | 1.50      | 0.88   | 1.25 | 1.21E+11              | 11.08           |  |  |
| 2600       | 9.27E+10                | 1.00                             | 1.00       | 1.51      | 0.89   | 1.24 | 1.54E+11              | 11.19           |  |  |
| 2700       | 1.15E+11                | 1.00                             | 1.00       | 1.51      | 0.89   | 1.23 | 1.90E+11              | 11.28           |  |  |
| 2800       | 1.39E+11                | 1.00                             | 1.00       | 1.51      | 0.90   | 1.20 | 2.25E+11              | 11.35           |  |  |
| 2900       | 1.69E+11                | 1.00                             | 1.00       | 1.51      | 0.90   | 1.19 | 2.73E+11              | 11.44           |  |  |
| 3000       | 2.03E+11                | 1.00                             | 1.00       | 1.51      | 0.90   | 1.17 | 3.24E+11              | 11.51           |  |  |

**SI Table 46:** Calculation of the RC-TST rate constants for the reaction R11: CCCC•CCCC → C•CC + C=CCCC.

| R11  |                    | Delta V = 34.557 kcal/mol |            |           |        |      |                |          |
|------|--------------------|---------------------------|------------|-----------|--------|------|----------------|----------|
| T    | k <sub>r</sub> (T) | FACTORS                   |            |           |        |      | Rate Constants | log k(T) |
|      |                    | Symmetry                  | Tunnelling | Partition | Energy | HR   |                |          |
| 300  | 7.28E-10           | 1.00                      | 0.99       | 0.97      | 9.43   | 1.16 | 7.65E-09       | -8.12    |
| 400  | 2.84E-04           | 1.00                      | 0.99       | 1.15      | 5.38   | 1.17 | 2.04E-03       | -2.69    |
| 500  | 7.17E-01           | 1.00                      | 1.00       | 1.26      | 3.84   | 1.18 | 4.07E+00       | 0.61     |
| 600  | 1.31E+02           | 1.00                      | 1.00       | 1.34      | 3.07   | 1.18 | 6.33E+02       | 2.80     |
| 700  | 5.90E+03           | 1.00                      | 1.00       | 1.39      | 2.62   | 1.19 | 2.54E+04       | 4.41     |
| 800  | 1.01E+05           | 1.00                      | 1.00       | 1.42      | 2.32   | 1.19 | 3.98E+05       | 5.60     |
| 900  | 9.23E+05           | 1.00                      | 1.00       | 1.45      | 2.11   | 1.20 | 3.39E+06       | 6.53     |
| 1000 | 5.33E+06           | 1.00                      | 1.00       | 1.47      | 1.96   | 1.23 | 1.89E+07       | 7.28     |
| 1100 | 2.27E+07           | 1.00                      | 1.00       | 1.49      | 1.84   | 1.24 | 7.69E+07       | 7.89     |
| 1200 | 7.80E+07           | 1.00                      | 1.00       | 1.50      | 1.75   | 1.27 | 2.61E+08       | 8.42     |
| 1300 | 2.11E+08           | 1.00                      | 1.00       | 1.51      | 1.68   | 1.32 | 7.08E+08       | 8.85     |
| 1400 | 5.17E+08           | 1.00                      | 1.00       | 1.52      | 1.62   | 1.32 | 1.68E+09       | 9.23     |
| 1500 | 1.09E+09           | 1.00                      | 1.00       | 1.53      | 1.57   | 1.32 | 3.43E+09       | 9.54     |
| 1600 | 2.15E+09           | 1.00                      | 1.00       | 1.53      | 1.52   | 1.31 | 6.59E+09       | 9.82     |
| 1700 | 3.78E+09           | 1.00                      | 1.00       | 1.54      | 1.49   | 1.31 | 1.13E+10       | 10.05    |
| 1800 | 6.44E+09           | 1.00                      | 1.00       | 1.54      | 1.45   | 1.30 | 1.88E+10       | 10.27    |
| 1900 | 1.04E+10           | 1.00                      | 1.00       | 1.55      | 1.43   | 1.29 | 2.96E+10       | 10.47    |
| 2000 | 1.52E+10           | 1.00                      | 1.00       | 1.55      | 1.40   | 1.28 | 4.23E+10       | 10.63    |
| 2100 | 2.22E+10           | 1.00                      | 1.00       | 1.55      | 1.38   | 1.27 | 6.04E+10       | 10.78    |
| 2200 | 3.15E+10           | 1.00                      | 1.00       | 1.55      | 1.36   | 1.26 | 8.39E+10       | 10.92    |
| 2300 | 4.18E+10           | 1.00                      | 1.00       | 1.56      | 1.34   | 1.26 | 1.09E+11       | 11.04    |
| 2400 | 5.55E+10           | 1.00                      | 1.00       | 1.56      | 1.32   | 1.24 | 1.42E+11       | 11.15    |
| 2500 | 7.25E+10           | 1.00                      | 1.00       | 1.56      | 1.31   | 1.23 | 1.83E+11       | 11.26    |
| 2600 | 9.27E+10           | 1.00                      | 1.00       | 1.56      | 1.30   | 1.22 | 2.29E+11       | 11.36    |
| 2700 | 1.15E+11           | 1.00                      | 1.00       | 1.56      | 1.28   | 1.23 | 2.83E+11       | 11.45    |
| 2800 | 1.39E+11           | 1.00                      | 1.00       | 1.56      | 1.27   | 1.11 | 3.06E+11       | 11.49    |
| 2900 | 1.69E+11           | 1.00                      | 1.00       | 1.56      | 1.26   | 1.13 | 3.76E+11       | 11.58    |
| 3000 | 2.03E+11           | 1.00                      | 1.00       | 1.57      | 1.25   | 1.03 | 4.09E+11       | 11.61    |

**SI Table 47:** Calculation of the RC-TST rate constants for the reaction R12: CCCC•CCCC → C•CC + C=CCCC.

| R12  |                    | Delta V = 34.508 kcal/mol |            |           |        |      |                |          |
|------|--------------------|---------------------------|------------|-----------|--------|------|----------------|----------|
| T    | k <sub>r</sub> (T) | FACTORS                   |            |           |        |      | Rate Constants | log k(T) |
|      |                    | Symmetry                  | Tunnelling | Partition | Energy | HR   |                |          |
| 300  | 7.28E-10           | 1.00                      | 0.98       | 0.94      | 10.24  | 0.77 | 5.28E-09       | -8.28    |
| 400  | 2.84E-04           | 1.00                      | 0.99       | 1.10      | 5.73   | 0.79 | 1.40E-03       | -2.85    |
| 500  | 7.17E-01           | 1.00                      | 0.99       | 1.20      | 4.04   | 0.80 | 2.75E+00       | 0.44     |
| 600  | 1.31E+02           | 1.00                      | 0.99       | 1.27      | 3.20   | 0.81 | 4.26E+02       | 2.63     |
| 700  | 5.90E+03           | 1.00                      | 0.99       | 1.31      | 2.71   | 0.82 | 1.70E+04       | 4.23     |
| 800  | 1.01E+05           | 1.00                      | 0.99       | 1.34      | 2.39   | 0.84 | 2.70E+05       | 5.43     |
| 900  | 9.23E+05           | 1.00                      | 0.99       | 1.36      | 2.17   | 0.86 | 2.33E+06       | 6.37     |
| 1000 | 5.33E+06           | 1.00                      | 1.00       | 1.38      | 2.01   | 0.85 | 1.25E+07       | 7.10     |
| 1100 | 2.27E+07           | 1.00                      | 1.00       | 1.39      | 1.89   | 0.86 | 5.10E+07       | 7.71     |
| 1200 | 7.80E+07           | 1.00                      | 1.00       | 1.40      | 1.79   | 0.87 | 1.69E+08       | 8.23     |
| 1300 | 2.11E+08           | 1.00                      | 1.00       | 1.41      | 1.71   | 0.88 | 4.46E+08       | 8.65     |
| 1400 | 5.17E+08           | 1.00                      | 1.00       | 1.41      | 1.65   | 0.88 | 1.06E+09       | 9.02     |
| 1500 | 1.09E+09           | 1.00                      | 1.00       | 1.42      | 1.59   | 0.80 | 1.96E+09       | 9.29     |
| 1600 | 2.15E+09           | 1.00                      | 1.00       | 1.42      | 1.55   | 0.85 | 4.01E+09       | 9.60     |
| 1700 | 3.78E+09           | 1.00                      | 1.00       | 1.43      | 1.51   | 0.81 | 6.55E+09       | 9.82     |
| 1800 | 6.44E+09           | 1.00                      | 1.00       | 1.43      | 1.47   | 0.81 | 1.09E+10       | 10.04    |
| 1900 | 1.04E+10           | 1.00                      | 1.00       | 1.43      | 1.44   | 0.83 | 1.78E+10       | 10.25    |
| 2000 | 1.52E+10           | 1.00                      | 1.00       | 1.43      | 1.42   | 0.83 | 2.55E+10       | 10.41    |
| 2100 | 2.22E+10           | 1.00                      | 1.00       | 1.44      | 1.39   | 0.83 | 3.66E+10       | 10.56    |
| 2200 | 3.15E+10           | 1.00                      | 1.00       | 1.44      | 1.37   | 0.88 | 5.46E+10       | 10.74    |
| 2300 | 4.18E+10           | 1.00                      | 1.00       | 1.44      | 1.35   | 0.89 | 7.23E+10       | 10.86    |
| 2400 | 5.55E+10           | 1.00                      | 1.00       | 1.44      | 1.34   | 0.92 | 9.81E+10       | 10.99    |
| 2500 | 7.25E+10           | 1.00                      | 1.00       | 1.44      | 1.32   | 0.90 | 1.24E+11       | 11.09    |
| 2600 | 9.27E+10           | 1.00                      | 1.00       | 1.44      | 1.31   | 0.94 | 1.64E+11       | 11.21    |
| 2700 | 1.15E+11           | 1.00                      | 1.00       | 1.44      | 1.29   | 1.00 | 2.14E+11       | 11.33    |
| 2800 | 1.39E+11           | 1.00                      | 1.00       | 1.44      | 1.28   | 1.04 | 2.67E+11       | 11.43    |
| 2900 | 1.69E+11           | 1.00                      | 1.00       | 1.44      | 1.27   | 1.20 | 3.72E+11       | 11.57    |
| 3000 | 2.03E+11           | 1.00                      | 1.00       | 1.44      | 1.26   | 1.22 | 4.51E+11       | 11.65    |
